# Supplementary material for: Copper-catalyzed asymmetric propargylic substitution with salicylaldehyde-derived imine esters
Source: Royal Society of Chemistry journal article supplement (doi:10.1039/d2cc01695h), 2022-01-01
Supplement: d2cc01695h1.pdf [file d2cc01695h1.pdf]

*Supporting Information for*

**Copper-Catalyzed Asymmetric Propargylic Substitution with  
Salicylaldehyde-Derived Imine Esters**

Ruo-Qing Wang,<sup>‡a,b</sup> Chong Shen,<sup>‡a</sup> Xiang Cheng,<sup>‡a</sup> Xiu-Qin Dong,<sup>\*a,c</sup> and Chun-Jiang Wang<sup>\*a,b</sup>

<sup>a</sup> Engineering Research Center of Organosilicon Compounds & Materials, Ministry of Education, College of Chemistry and Molecular Sciences, Suzhou Institute of Wuhan University, Wuhan University, Wuhan, Hubei, 430072, P. R. China.

<sup>b</sup> State Key Laboratory of Organometallic Chemistry, Shanghai Institute of Organic Chemistry, Shanghai, 230021, China

<sup>c</sup> Suzhou Institute of Wuhan University, Suzhou, Jiangsu, 215123, P. R. China

<sup>‡</sup> These authors contributed equally.

E-mail address: cjwang@whu.edu.cn, xiuqindong@whu.edu.cn

**Table of Contents**

|      |                                                             |     |
|------|-------------------------------------------------------------|-----|
| I.   | General Remarks.....                                        | S2  |
| II.  | General Procedure for the synthesis of <b>3</b> .....       | S2  |
| III. | Synthetic Transformation.....                               | S10 |
| IV.  | Determination of Absolute Configuration of <b>3a'</b> ..... | S13 |
| V.   | Reference.....                                              | S15 |
| VI.  | NMR and HPLC Spectra.....                                   | S16 |

## I. General Remarks

<sup>1</sup>H NMR spectra were recorded on a Bruker 400 MHz spectrometer in CDCl<sub>3</sub>. Chemical shifts are reported in ppm with the internal TMS signal at 0.0 ppm as a standard. <sup>13</sup>C NMR spectra were recorded on a Bruker 100 MHz spectrometer in CDCl<sub>3</sub>. Chemical shifts are reported in ppm with the internal chloroform signal at 77.0 ppm as a standard. <sup>19</sup>F NMR spectra were recorded on a Bruker 376 MHz spectrometer in CDCl<sub>3</sub>. Chemical shifts are reported in ppm with the internal CF<sub>3</sub>COOH signal at -76.55 ppm. The data are reported as (s = single, d = double, t = triple, q = quarter, m = multiple or unresolved, br s = broad single, coupling constant(s) in Hz, integration). Commercially obtained reagents were used without further purification. Solvents were purified prior to use according to the standard methods. Unless otherwise noted, all reactions were carried out under nitrogen atmosphere. The enantiomeric excesses (ee) of the products were determined by high-performance liquid chromatography (HPLC) analysis performed on Agilent 1260 Series chromatographs using a Diacel chiral column (25 cm). Optical rotations were measured on a Rudolph Research Analytical Autopol VI polarimeter with [ $\alpha$ ]D values reported in degrees; concentration (c) is in g/100 mL. All reactions were reacted under Ar<sub>2</sub> atmosphere. The absolute configuration of **9** was determined by comparing the result of previous report<sup>1</sup>, and absolute configurations of other adducts were deduced on the basis of these results.

## II. General Procedure for the synthesis of **3**

In a 10 mL Schlenk tube was placed Cu(CH<sub>3</sub>CN)<sub>4</sub>BF<sub>4</sub> (0.01 mmol) and **L4** (0.01 mmol) under Ar. Anhydrous DCM (1.0 mL) was added, and the mixture was magnetically stirred at room temperature for 30 min. Then the reaction flask was placed in a cool bath of -10 °C, followed by the addition of **1a** (0.2 mmol), **2** (0.2 mmol), 4-methylmorpholine (0.2 mmol) and anhydrous DCM (1.0 mL) sequentially, and monitored by TLC analysis. After completion, the reaction was quenched with H<sub>2</sub>O (3 mL). The aqueous layer was extracted three times with ethyl acetate (6 mL ×3). The combined organic layer was dried over Na<sub>2</sub>SO<sub>4</sub>. The volatile solvent was removed under reduced pressure. The residue was purified by flash chromatography on silica gel to afford pure **3**.

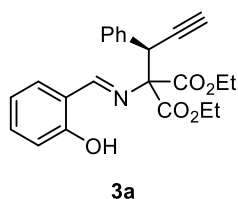

**diethyl (*R,E*)-2-((2-hydroxybenzylidene)amino)-2-(1-phenylprop-2-yn-1-yl)malonate (**3a**):** 67.4 mg, 86% yield, yellow oil;  $[\alpha]_D^{32} = -48.77$  (*c* 1.06, CH<sub>2</sub>Cl<sub>2</sub>); <sup>1</sup>H NMR (400 MHz, CDCl<sub>3</sub>) δ 13.06 (s, 1H), 8.45 (s, 1H), 7.40 – 7.26 (m, 7H), 7.02 (d, *J* = 9.0 Hz, 1H), 6.91 (m, 1H), 4.87 (d, *J* = 2.5 Hz, 1H), 4.39 – 4.29 (m, 2H), 4.13 – 4.03 (m, 2H), 2.42 (d, *J* = 2.5 Hz, 1H), 1.31 (t, *J* = 7.1 Hz, 3H), 1.14 (t, *J* = 7.1 Hz, 3H); <sup>13</sup>C NMR (101 MHz, CDCl<sub>3</sub>) δ 169.2, 166.9, 166.5, 161.1, 135.1, 133.3, 132.6, 129.6, 128.21, 128.17, 118.9, 118.7, 117.4, 81.9, 78.7, 74.3, 62.7, 62.4, 44.7, 14.0, 13.8; HRMS (ESI+) Calcd. For C<sub>23</sub>H<sub>24</sub>NO<sub>5</sub><sup>+</sup> ([M+H]<sup>+</sup>): 394.1649, found: 394.1652. The product was analyzed by HPLC to determine the enantiomeric excess: 92% ee (Chiralpak IE, *i*-propanol/hexane = 2/98 flow rate 1.0 mL/min, λ = 220 nm); *t<sub>r</sub>* = 19.12 and 21.61 min.

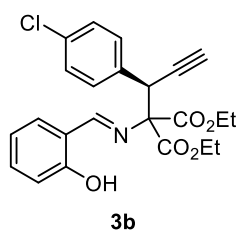

**diethyl (*R,E*)-2-(1-(4-chlorophenyl)prop-2-yn-1-yl)-2-((2-hydroxybenzylidene)amino)malonate (**3b**):** 68.4 mg, 80% yield, yellow oil;  $[\alpha]_D^{32} = -76.92$  (*c* 1.05, CH<sub>2</sub>Cl<sub>2</sub>); <sup>1</sup>H NMR (400 MHz, CDCl<sub>3</sub>) δ 12.96 (s, 1H), 8.46 (s, 1H), 7.43 – 7.34 (m, 1H), 7.33 – 7.27 (m, 3H), 7.24 (m, 2H), 7.02 (d, *J* = 8.2 Hz, 1H), 6.92 (m, 1H), 4.84 (d, *J* = 2.5 Hz, 1H), 4.43 – 4.27 (m, 2H), 4.17 – 3.98 (m, 2H), 2.43 (d, *J* = 2.5 Hz, 1H), 1.31 (t, *J* = 7.1 Hz, 3H), 1.17 (t, *J* = 7.1 Hz, 3H); <sup>13</sup>C NMR (101 MHz, CDCl<sub>3</sub>) δ 169.4, 166.6, 166.4, 161.1, 134.2, 133.7, 133.4, 132.7, 131.0, 128.4, 118.84, 118.76, 117.4, 81.5, 78.5, 74.6, 62.8, 62.5, 44.1, 13.9, 13.8; HRMS (ESI+) Calcd. For C<sub>23</sub>H<sub>23</sub>ClNO<sub>5</sub><sup>+</sup> ([M+H]<sup>+</sup>): 428.1259, found: 428.1259. The product was analyzed by HPLC to determine the enantiomeric excess: 94% ee (Chiralpak AD-H, *i*-propanol/hexane = 5/95 flow rate 1.0 mL/min, λ = 262 nm); *t<sub>r</sub>* = 15.49 and 17.68 min.

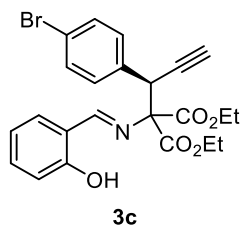

**diethyl (*R,E*)-2-(1-(4-bromophenyl)prop-2-yn-1-yl)-2-((2-hydroxybenzylidene)amino)-malonate (**3c**):** 78.4 mg, 83% yield, yellow oil;  $[\alpha]_D^{32} = -87.46$  (*c* 1.34, CH<sub>2</sub>Cl<sub>2</sub>); <sup>1</sup>H NMR (400 MHz, CDCl<sub>3</sub>) δ 12.96 (s, 1H), 8.46 (s, 1H), 7.42 – 7.35 (m, 3H), 7.30 (dd, *J* = 7.7, 1.7 Hz, 1H), 7.23 (d, *J* = 8.5 Hz, 2H), 7.02 (d, *J* = 7.4 Hz, 1H), 6.94 – 6.90 (m, 1H), 4.83 (d, *J* = 2.5 Hz, 1H), 4.40 – 4.27 (m, 2H), 4.17 – 4.05 (m, 2H), 2.43 (d, *J* = 2.4 Hz, 1H), 1.31 (t, *J* = 7.1 Hz, 3H), 1.17 (t, *J* = 7.1 Hz, 3H); <sup>13</sup>C NMR (101 MHz, CDCl<sub>3</sub>) δ 169.4, 166.6, 166.4, 161.0, 134.2, 133.5, 132.7, 131.33, 131.31, 122.4, 118.9, 118.7, 117.4, 81.4, 78.4, 74.6, 62.9, 62.5, 44.1, 13.9, 13.8; HRMS (ESI+) Calcd. For C<sub>23</sub>H<sub>23</sub>BrNO<sub>5</sub><sup>+</sup> ([M+H]<sup>+</sup>): 472.0574, found: 472.0566. The product was analyzed by HPLC to determine the enantiomeric excess: 90% ee (Chiralpak AD-H, *i*-propanol/hexane = 5/95 flow rate 1.0 mL/min, λ = 220 nm); t<sub>r</sub> = 16.91 and 18.45 min.

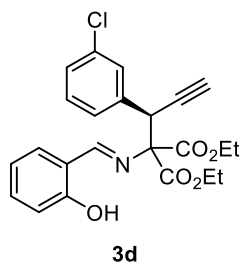

**diethyl (*R,E*)-2-(1-(3-chlorophenyl)prop-2-yn-1-yl)-2-((2-hydroxybenzylidene)amino)-malonate (**3d**):** 68.3 mg, 80% yield, yellow oil;  $[\alpha]_D^{32} = -65.74$  (*c* 1.01, CH<sub>2</sub>Cl<sub>2</sub>); <sup>1</sup>H NMR (400 MHz, CDCl<sub>3</sub>) δ 12.91 (s, 1H), 8.46 (s, 1H), 7.42 – 7.25 (m, 4H), 7.26 – 7.17 (m, 2H), 7.02 (d, *J* = 7.8 Hz, 1H), 6.91 (t, *J* = 7.5 Hz, 1H), 4.84 (d, *J* = 2.5 Hz, 1H), 4.41 – 4.27 (m, 2H), 4.17 – 4.09 (m, 2H), 2.45 (d, *J* = 2.5 Hz, 1H), 1.31 (t, *J* = 7.1 Hz, 3H), 1.18 (t, *J* = 7.1 Hz, 3H); <sup>13</sup>C NMR (101 MHz, CDCl<sub>3</sub>) δ 169.5, 166.6, 166.4, 161.1, 137.1, 133.9, 133.5, 132.7, 129.8, 129.5, 128.3, 127.9, 118.82, 118.77, 117.4, 81.2, 78.5, 74.7, 62.9, 62.6, 44.3, 14.0, 13.8; Calcd. For C<sub>23</sub>H<sub>23</sub>ClNO<sub>5</sub><sup>+</sup> ([M+H]<sup>+</sup>): 428.1258, found: 428.1259. The product was analyzed by HPLC to determine the enantiomeric excess: 87% ee (Chiralpak AD-H, *i*-propanol/hexane = 5/95 flow rate 1.0 mL/min, λ = 264 nm); t<sub>r</sub> = 13.89 and 20.14 min.

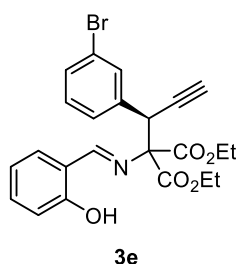

**diethyl (*R,E*)-2-(1-(3-bromophenyl)prop-2-yn-1-yl)-2-((2-hydroxybenzylidene)amino)-malonate (**3e**):** 79.1 mg, 84% yield, yellow oil;  $[\alpha]_D^{32} = -60.40$  (*c* 1.01, CH<sub>2</sub>Cl<sub>2</sub>); <sup>1</sup>H NMR (400 MHz, CDCl<sub>3</sub>) δ 12.91 (s, 1H), 8.46 (s, 1H), 7.46 (t, *J* = 1.9 Hz, 1H), 7.42 – 7.29 (m, 4H), 7.16 (t, *J* = 7.9 Hz, 1H), 7.04 – 6.99 (m, 1H), 6.91 (m, 1H), 4.82 (d, *J* = 2.5 Hz, 1H), 4.40 – 4.29 (m, 2H), 4.17 – 4.09 (m, 2H), 2.44 (d, *J* = 2.5 Hz, 1H), 1.31 (t, *J* = 7.1 Hz, 3H), 1.19 (t, *J* = 7.1 Hz, 3H); <sup>13</sup>C NMR (101 MHz, CDCl<sub>3</sub>) δ 169.5, 166.6, 166.3, 161.1, 137.3, 133.5, 132.70, 132.67, 131.2, 129.8, 128.3, 122.0, 118.82, 118.75, 117.4, 81.2, 78.5, 74.7, 62.9, 62.6, 44.3, 14.0, 13.8; HRMS (ESI+) Calcd. For C<sub>23</sub>H<sub>23</sub>BrNO<sub>5</sub><sup>+</sup> ([M+H]<sup>+</sup>): 472.0571, found: 472.0566. The product was analyzed by HPLC to determine the enantiomeric excess: 87% ee (Chiralpak AD-H, *i*-propanol/hexane = 5/95 flow rate 1.0 mL/min, λ = 220 nm); t<sub>r</sub> = 14.14 and 22.15 min.

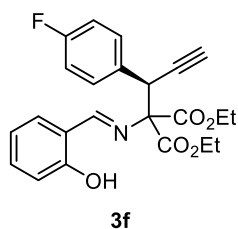

**diethyl (*R,E*)-2-(1-(4-fluorophenyl)prop-2-yn-1-yl)-2-((2-hydroxybenzylidene)amino)-malonate (**3f**):** 72.3 mg, 88% yield, yellow oil;  $[\alpha]_D^{32} = -48.81$  (*c* 1.18, CH<sub>2</sub>Cl<sub>2</sub>); <sup>1</sup>H NMR (400 MHz, CDCl<sub>3</sub>) δ 13.00 (s, 1H), 8.45 (s, 1H), 7.41 – 7.36 (m, 1H), 7.34 – 7.29 (m, 3H), 7.02 (d, *J* = 8.3 Hz, 1H), 6.99 – 6.89 (m, 3H), 4.85 (d, *J* = 2.5 Hz, 1H), 4.38 – 4.29 (m, 2H), 4.15 – 4.06 (m, 2H), 2.43 (d, *J* = 2.5 Hz, 1H), 1.31 (t, *J* = 7.1 Hz, 3H), 1.16 (t, *J* = 7.1 Hz, 3H); <sup>13</sup>C NMR (101 MHz, CDCl<sub>3</sub>) δ 169.4, 166.7, 166.5, 162.5 (d, *J* = 245.9 Hz), 161.1, 133.4, 132.7, 131.3 (d, *J* = 8.1 Hz), 130.9 (d, *J* = 3.1 Hz), 118.9 (d, *J* = 8.0 Hz), 117.4, 115.3, 115.0, 81.7, 78.6, 74.5, 62.8, 62.5, 43.9, 14.0, 13.8; <sup>19</sup>F NMR (376 MHz, CDCl<sub>3</sub>) δ -113.82; HRMS (ESI+) Calcd. For C<sub>23</sub>H<sub>23</sub>FNO<sub>5</sub><sup>+</sup> ([M+H]<sup>+</sup>): 412.1555, found: 412.1553. The product was analyzed by HPLC

to determine the enantiomeric excess: 90% ee (Chiralpak IE, *i*-propanol/hexane = 5/95 flow rate 1.0 mL/min,  $\lambda = 254$  nm);  $t_r = 11.28$  and 12.72 min.

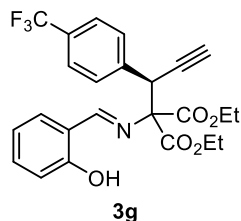

**diethyl (*R,E*)-2-((2-hydroxybenzylidene)amino)-2-(1-(4-(trifluoromethyl)phenyl)prop-2-yn-1-yl)malonate (**3g**):** 82.9 mg, 90% yield, yellow oil;  $[\alpha]_D^{32} = -57.19$  (*c* 1.14, CH<sub>2</sub>Cl<sub>2</sub>); <sup>1</sup>H NMR (400 MHz, CDCl<sub>3</sub>)  $\delta$  12.92 (s, 1H), 8.48 (s, 1H), 7.56 – 7.47 (m, 4H), 7.42 – 7.37 (m, 1H), 7.31 (dd, *J* = 7.7, 1.7 Hz, 1H), 7.02 (d, *J* = 8.3 Hz, 1H), 6.95 – 6.91 (m, 1H), 4.92 (d, *J* = 2.5 Hz, 1H), 4.41 – 4.29 (m, 2H), 4.15 – 4.05 (m, 2H), 2.46 (d, *J* = 2.5 Hz, 1H), 1.32 (t, *J* = 7.1 Hz, 3H), 1.14 (t, *J* = 7.1 Hz, 3H); <sup>13</sup>C NMR (101 MHz, CDCl<sub>3</sub>)  $\delta$  169.6, 166.6, 166.4, 161.1, 139.3, 133.6, 132.7, 130.4 (q, *J* = 32.3 Hz), 130.1, 125.1 (q, *J* = 4.0 Hz), 123.9 (q, *J* = 272.7 Hz), 118.9, 118.7, 117.4, 81.1, 78.5, 74.9, 63.0, 62.6, 44.4, 13.9, 13.7; <sup>19</sup>F NMR (376 MHz, CDCl<sub>3</sub>)  $\delta$  -62.66; HRMS (ESI+) Calcd. For C<sub>24</sub>H<sub>23</sub>F<sub>3</sub>NO<sub>5</sub><sup>+</sup> ([M+H]<sup>+</sup>): 462.1523, found: 462.1522. The product was analyzed by HPLC to determine the enantiomeric excess: 92% ee (Chiralpak IE, *i*-propanol/hexane = 5/95 flow rate 1.0 mL/min,  $\lambda = 254$  nm);  $t_r = 7.52$  and 8.27 min.

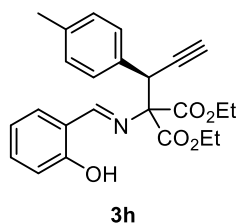

**diethyl (*R,E*)-2-((2-hydroxybenzylidene)amino)-2-(1-(*p*-tolyl)prop-2-yn-1-yl)malonate (**3h**):** 65.2 mg, 80% yield, yellow oil;  $[\alpha]_D^{32} = -56.79$  (*c* 1.12, CH<sub>2</sub>Cl<sub>2</sub>); <sup>1</sup>H NMR (400 MHz, CDCl<sub>3</sub>)  $\delta$  13.10 (s, 1H), 8.46 (s, 1H), 7.37 (m, 1H), 7.29 (dd, *J* = 7.7, 1.7 Hz, 1H), 7.24 – 7.19 (m, 2H), 7.07 (d, *J* = 7.8 Hz, 2H), 7.03 – 7.00 (m, 1H), 6.93 – 6.89 (m, 1H), 4.83 (d, *J* = 2.5 Hz, 1H), 4.38 – 4.28 (m, 2H), 4.14 – 4.04 (m, 2H), 2.40 (d, *J* = 2.5 Hz, 1H), 2.29 (s, 3H), 1.31 (t, *J* = 7.1 Hz, 3H), 1.16 (t, *J* = 7.1 Hz, 3H); <sup>13</sup>C NMR (101 MHz, CDCl<sub>3</sub>)  $\delta$  169.2, 166.9, 166.5,

161.1, 137.9, 133.2, 132.6, 132.0, 129.4, 128.9, 118.9, 118.7, 117.4, 82.1, 78.7, 74.1, 62.7, 62.3, 44.4, 21.1, 14.0, 13.8; HRMS (ESI+) Calcd. For  $C_{24}H_{26}NO_5^+$  ( $[M+H]^+$ ): 408.1805, found: 408.1811. The product was analyzed by HPLC to determine the enantiomeric excess: 94% ee (Chiralpak AD-H, *i*-propanol/hexane = 5/95 flow rate 1.0 mL/min,  $\lambda$  = 262 nm);  $t_r$  = 17.79 and 20.48 min.

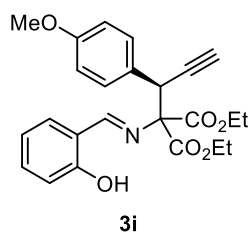

**diethyl (R,E)-2-((2-hydroxybenzylidene)amino)-2-(1-(4-methoxyphenyl)prop-2-yn-1-yl)malonate (3i):** 80.1 mg, 95% yield, yellow oil;  $[\alpha]_D^{32} = -90.80$  (*c* 1.38,  $CH_2Cl_2$ );  $^1H$  NMR (400 MHz,  $CDCl_3$ )  $\delta$  13.11 (s, 1H), 8.44 (s, 1H), 7.40 – 7.35 (m, 1H), 7.32 – 7.25 (m, 3H), 7.02 (d, *J* = 8.2 Hz, 1H), 6.91 (t, *J* = 7.5 Hz, 1H), 6.80 (d, *J* = 8.7 Hz, 2H), 4.82 (d, *J* = 2.5 Hz, 1H), 4.38 – 4.28 (m, 2H), 4.15 – 4.05 (m, 2H), 3.75 (s, 3H), 2.41 (d, *J* = 2.4 Hz, 1H), 1.31 (t, *J* = 7.1 Hz, 3H), 1.17 (t, *J* = 7.1 Hz, 3H);  $^{13}C$  NMR (101 MHz,  $CDCl_3$ )  $\delta$  169.2, 166.9, 166.6, 161.1, 159.4, 133.3, 132.6, 130.7, 127.1, 118.9, 118.7, 117.4, 113.6, 82.2, 78.8, 74.1, 62.7, 62.4, 55.2, 44.0, 14.0, 13.9; HRMS (ESI+) Calcd. For  $C_{24}H_{26}NO_6^+$  ( $[M+H]^+$ ): 424.1755, found: 424.1753. The product was analyzed by HPLC to determine the enantiomeric excess: 92% ee (Chiralpak AD-H, *i*-propanol/hexane = 2/98 flow rate 1.0 mL/min,  $\lambda$  = 254 nm);  $t_r$  = 38.30 and 46.27 min.

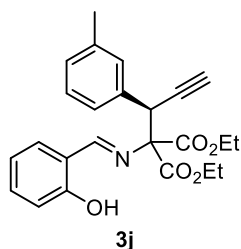

**diethyl (R,E)-2-((2-hydroxybenzylidene)amino)-2-(1-(m-tolyl)prop-2-yn-1-yl)malonate (3j):** 69.3 mg, 85% yield, yellow oil;  $[\alpha]_D^{32} = -54.85$  (*c* 1.36,  $CH_2Cl_2$ );  $^1H$  NMR (400 MHz,  $CDCl_3$ )  $\delta$  13.05 (s, 1H), 8.42 (s, 1H), 7.39 – 7.34 (m, 1H), 7.30 – 7.26 (m, 1H), 7.14 (t, *J* = 6.4 Hz, 3H), 7.07 (s, 1H), 7.02 (d, *J* = 8.2 Hz, 1H), 6.92 – 6.88 (m, 1H), 4.83 (d, *J* = 2.5 Hz, 1H),

4.40 – 4.28 (m, 2H), 4.13 – 4.04 (m, 2H), 2.41 (d,  $J = 2.5$  Hz, 1H), 2.27 (s, 3H), 1.31 (t,  $J = 7.1$  Hz, 3H), 1.15 (t,  $J = 7.1$  Hz, 3H);  $^{13}\text{C}$  NMR (101 MHz,  $\text{CDCl}_3$ )  $\delta$  168.9, 166.9, 166.6, 161.2, 137.8, 134.9, 133.2, 132.6, 130.4, 128.9, 128.1, 126.6, 118.9, 118.7, 117.4, 82.0, 78.7, 74.2, 62.7, 62.3, 44.7, 21.3, 14.0, 13.8; HRMS (ESI+) Calcd. For  $\text{C}_{24}\text{H}_{26}\text{NO}_5^+$  ( $[\text{M}+\text{H}]^+$ ): 408.1805, found: 408.1806. The product was analyzed by HPLC to determine the enantiomeric excess: 92% ee (Chiralpak AD-H, *i*-propanol/hexane = 5/95 flow rate 1.0 mL/min,  $\lambda = 220$  nm);  $t_r = 14.09$  and 17.76 min.

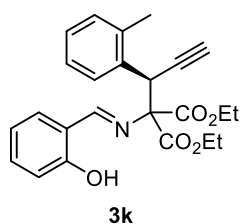

**diethyl (R,E)-2-((2-hydroxybenzylidene)amino)-2-(1-(o-tolyl)prop-2-yn-1-yl)malonate**

**(3k):** 61.1 mg, 75% yield, yellow oil;  $[\alpha]_D^{32} = -50.00$  ( $c$  1.17,  $\text{CH}_2\text{Cl}_2$ );  $^1\text{H}$  NMR (400 MHz, Chloroform-*d*)  $\delta$  13.16 (s, 1H), 8.54 (s, 1H), 7.47 – 7.42 (m, 1H), 7.39 (ddd,  $J = 8.6, 7.3, 1.7$  Hz, 1H), 7.34 (dd,  $J = 7.7, 1.7$  Hz, 1H), 7.15 – 7.08 (m, 3H), 7.04 (dd,  $J = 8.3, 1.0$  Hz, 1H), 6.95 – 6.91 (m, 1H), 5.16 (d,  $J = 2.5$  Hz, 1H), 4.42 – 4.27 (m, 2H), 4.06 – 3.87 (m, 2H), 2.39 (s, 3H), 2.38 (d,  $J = 2.4$  Hz, 1H), 1.30 (t,  $J = 7.1$  Hz, 3H), 0.98 (t,  $J = 7.1$  Hz, 3H).  $^{13}\text{C}$  NMR (101 MHz, Chloroform-*d*)  $\delta$  168.9, 167.1, 166.8, 161.1, 135.9, 134.3, 133.3, 132.6, 130.3, 129.5, 127.9, 126.3, 118.9, 118.8, 117.4, 82.4, 78.0, 73.9, 62.8, 62.3, 39.4, 19.7, 13.9, 13.5; HRMS (ESI+) Calcd. For  $\text{C}_{24}\text{H}_{26}\text{NO}_5^+$  ( $[\text{M}+\text{H}]^+$ ): 408.1805, found: 408.1802. The product was analyzed by HPLC to determine the enantiomeric excess: 76% ee (Chiralpak AD-H, *i*-propanol/hexane = 5/95 flow rate 1.0 mL/min,  $\lambda = 220$  nm);  $t_r = 13.02$  and 14.71 min.

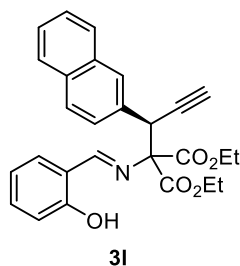



**diethyl (R,E)-2-((2-hydroxybenzylidene)amino)-2-(1-(naphthalen-2-yl)prop-2-yn-1-yl)malonate (3l):** 80.7 mg, 91% yield, yellow oil;  $[\alpha]_D^{32} = -90.87$  (*c* 1.15, CH<sub>2</sub>Cl<sub>2</sub>); <sup>1</sup>H NMR (400 MHz, CDCl<sub>3</sub>) δ 13.11 (s, 1H), 8.47 (s, 1H), 7.82 – 7.73 (m, 4H), 7.51 – 7.36 (m, 4H), 7.30 – 7.26 (m, 1H), 7.04 (d, *J* = 8.3 Hz, 1H), 6.93 – 6.89 (m, 1H), 5.04 (d, *J* = 2.5 Hz, 1H), 4.41 – 4.30 (m, 2H), 4.04 (q, *J* = 7.1 Hz, 2H), 2.47 (d, *J* = 2.5 Hz, 1H), 1.32 (t, *J* = 7.1 Hz, 3H), 1.05 (t, *J* = 7.1 Hz, 3H); <sup>13</sup>C NMR (101 MHz, CDCl<sub>3</sub>) δ 169.2, 166.9, 166.5, 161.2, 133.3, 133.0, 132.9, 132.7, 132.6, 129.0, 127.93, 127.90, 127.6, 127.1, 126.2, 126.1, 118.9, 118.8, 117.4, 81.9, 78.9, 74.5, 62.8, 62.4, 44.9, 14.0, 13.7; HRMS (ESI+) Calcd. For C<sub>27</sub>H<sub>26</sub>NO<sub>5</sub><sup>+</sup> ([M+H]<sup>+</sup>): 444.1805, found: 444.1805. The product was analyzed by HPLC to determine the enantiomeric excess: 91% ee (Chiralpak AD-H, *i*-propanol /hexane = 5/95 flow rate 1.0 mL/min, λ = 220 nm); *t*<sub>r</sub> = 27.07 and 28.87 min.

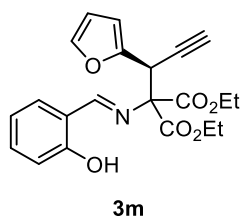

**diethyl (S,E)-2-(1-(furan-2-yl)prop-2-yn-1-yl)-2-((2-hydroxybenzylidene)amino)malonate (3m):** 66.6 mg, 87% yield, yellow oil;  $[\alpha]_D^{32} = -33.00$  (*c* 1.00, CH<sub>2</sub>Cl<sub>2</sub>); <sup>1</sup>H NMR (400 MHz, CDCl<sub>3</sub>) δ 12.90 (s, 1H), 8.55 (s, 1H), 7.37 – 7.29 (m, 3H), 6.97 (d, *J* = 8.3 Hz, 1H), 6.89 (m, 1H), 6.40 (dt, *J* = 3.3, 0.8 Hz, 1H), 6.31 (dd, *J* = 3.2, 1.9 Hz, 1H), 5.05 (d, *J* = 2.6 Hz, 1H), 4.39 – 4.30 (m, 2H), 4.26 (q, *J* = 7.1 Hz, 2H), 2.38 (d, *J* = 2.5 Hz, 1H), 1.33 (t, *J* = 7.1 Hz, 3H), 1.27 (t, *J* = 7.1 Hz, 3H); <sup>13</sup>C NMR (101 MHz, CDCl<sub>3</sub>) δ 170.3, 166.3, 166.2, 161.1, 148.7, 142.5, 133.2, 132.7, 119.0, 118.7, 117.3, 110.7, 110.1, 79.2, 77.2, 73.6, 62.9, 62.8, 39.1, 14.0, 13.9; HRMS (ESI+) Calcd. For C<sub>21</sub>H<sub>22</sub>NO<sub>6</sub><sup>+</sup> ([M+H]<sup>+</sup>): 384.1442, found: 384.1440. The product was analyzed by HPLC to determine the enantiomeric excess: 93% ee (Chiralpak IE, *i*-propanol/hexane = 5/95 flow rate 1.0 mL/min, λ = 254 nm); *t*<sub>r</sub> = 18.62 and 21.27 min.

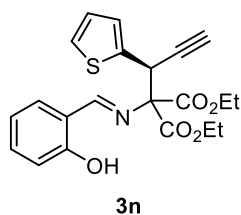

**diethyl (*S,E*)-2-((2-hydroxybenzylidene)amino)-2-(1-(thiophen-2-yl)prop-2-yn-1-yl)-malonate (**3n**):** 70.3 mg, 88% yield, yellow oil;  $[\alpha]_D^{32} = -45.98$  (*c* 1.02, CH<sub>2</sub>Cl<sub>2</sub>); <sup>1</sup>H NMR (400 MHz, CDCl<sub>3</sub>) δ 12.92 (s, 1H), 8.55 (s, 1H), 7.39 – 7.34 (m, 1H), 7.31 – 7.29 (m, 1H), 7.22 – 7.20 (m, 1H), 7.07 – 6.99 (m, 2H), 6.92 – 6.87 (m, 2H), 5.21 (d, *J* = 2.5 Hz, 1H), 4.39 – 4.29 (m, 2H), 4.25 – 4.13 (m, 2H), 2.45 (d, *J* = 2.5 Hz, 1H), 1.32 (t, *J* = 7.1 Hz, 3H), 1.23 (t, *J* = 7.1 Hz, 3H); <sup>13</sup>C NMR (101 MHz, CDCl<sub>3</sub>) δ 170.3, 166.4, 166.2, 161.0, 137.2, 133.3, 132.8, 128.2, 126.3, 118.9, 118.7, 117.3, 81.3, 78.4, 74.1, 62.9, 62.7, 40.2, 13.9, 13.8; HRMS (ESI+) Calcd. For C<sub>21</sub>H<sub>22</sub>NO<sub>5</sub>S<sup>+</sup> ([M+H]<sup>+</sup>): 400.1213, found: 400.1209. The product was analyzed by HPLC to determine the enantiomeric excess: 90% ee (Chiralpak AD-H, *i*-propanol/hexane = 5/95 flow rate 1.0 mL/min, λ = 220 nm); t<sub>r</sub> = 26.81 and 33.63 min.

### III. Synthetic Transformation

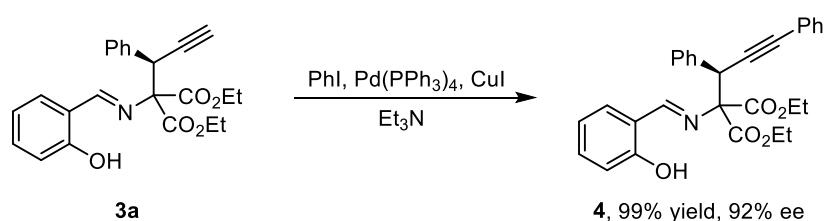

A mixture of **3a** (0.2 mmol, 92% ee), iodobenzene (0.40 mmol), Pd(PPh<sub>3</sub>)<sub>4</sub> (0.02 mmol), and CuI (0.04 mmol) in Et<sub>3</sub>N (2 mL) was stirred at 25 °C for 20 h.<sup>2,3</sup> After the reaction was completed, the crude reaction mixture was filtrated with celite and washed with EtOAc. The solvents were removed under reduced pressure. Then the residue was purified by silica gel column chromatography to afford the desired product **4**.

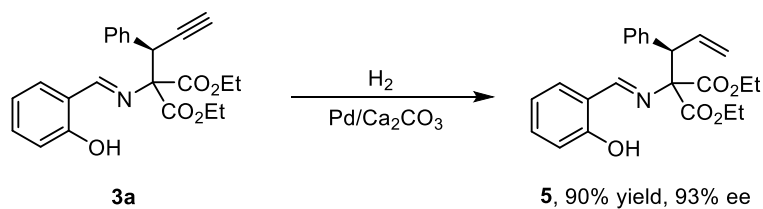

To a solution of **3a** (0.20 mmol) in EtOH (2 mL) under nitrogen, then 10 mg Pd-CaCO<sub>3</sub> was added. The reaction mixture was stirred under H<sub>2</sub> atmosphere (1 atm) at 25 °C for 3d.<sup>2</sup> After the reaction was completed (monitored by TLC), the crude reaction mixture was filtered over a short pad of celite and washed with EtOAc. The solvents were removed under reduced pressure. Then the residue was purified by silica gel column chromatography to afford the desired product **5**.

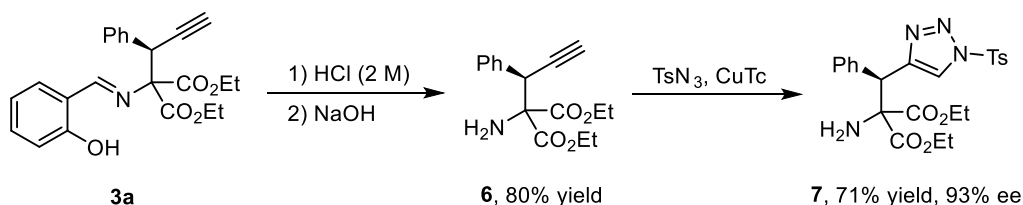

To a solution of **3a** (0.30 mmol) in THF (1 mL), then 1 mL 2 M HCl was added. The reaction mixture was stirred at 25 °C for 2 h. After the reaction was complete (monitored by TLC), THF was removed under reduced pressure. The crude reaction mixture was extracted with EtOAc (3 × 3 mL) and the aqueous solution was added with 10% NaOH until pH = 10, then the crude reaction mixture was extracted with DCM (3 × 3 mL), the organics were combined and dried over Na<sub>2</sub>SO<sub>4</sub> and concentrated under vacuum and purified by silica-gel flash chromatography to afford the desired product **6**.

A mixture of **6** (0.20 mmol), copper(I) thiophene-2-carboxylate (CuTc, 0.02 mmol) in anhydrous toluene (1.5 mL) was cooled in an ice-water bath. Subsequently, the tosyl azide (0.24 mmol) was added slowly, then the reaction mixture was allowed to warm to room temperature and stir until complete (monitored by TLC).<sup>2,3</sup> The reaction was quenched by saturated NH<sub>4</sub>Cl aqueous solution (3 mL) and extracted into EtOAc (3 × 5 mL). The combined organic layers were dried over Na<sub>2</sub>SO<sub>4</sub>, filtrated and concentrated in vacuo. Then the residue was purified by silica gel column chromatography to afford the desired product **7**.

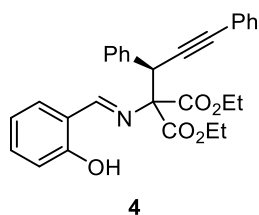

**diethyl (S,E)-2-(1,3-diphenylprop-2-yn-1-yl)-2-((2-hydroxybenzylidene)amino)malonate (4):** 93.0 mg, 99% yield, yellow oil;  $[\alpha]_D^{32} = -8.59$  (*c* 0.92, CH<sub>2</sub>Cl<sub>2</sub>); <sup>1</sup>H NMR (400 MHz, Chloroform-*d*)  $\delta$  13.18 (s, 1H), 8.46 (s, 1H), 7.42 – 7.32 (m, 5H), 7.30 – 7.24 (m, 7H), 7.03 (dd, *J* = 8.4, 1.0 Hz, 1H), 6.91 – 6.87 (m, 1H), 5.09 (s, 1H), 4.42 – 4.26 (m, 2H), 4.14 – 4.05 (m, 2H), 1.30 (t, *J* = 7.1 Hz, 3H), 1.14 (t, *J* = 7.1 Hz, 3H). <sup>13</sup>C NMR (101 MHz, Chloroform-*d*)  $\delta$  168.8, 167.0, 166.8, 161.3, 135.6, 133.2, 132.5, 131.7, 129.7, 128.2, 128.13, 128.07, 122.9, 118.9, 118.7, 117.4, 87.4, 86.4, 79.2, 62.6, 62.3, 45.6, 14.0, 13.8.; HRMS (ESI+) Calcd. For C<sub>29</sub>H<sub>28</sub>NO<sub>5</sub><sup>+</sup> ([M+H]<sup>+</sup>): 470.1962, found: 470.1960. The product was analyzed by HPLC to determine the enantiomeric excess: 92% ee (Chiralpak IE, *i*-propanol/hexane = 5/95 flow rate 1.0 mL/min,  $\lambda$  = 254 nm); *t<sub>r</sub>* = 11.88 and 14.01 min.

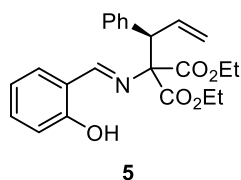

**diethyl (R,E)-2-((2-hydroxybenzylidene)amino)-2-(1-phenylallyl)malonate (5):** 71.2 mg, 90% yield, yellow oil;  $[\alpha]_D^{32} = 14.3$  (*c* 1.20, CH<sub>2</sub>Cl<sub>2</sub>); <sup>1</sup>H NMR (400 MHz, Chloroform-*d*)  $\delta$  13.12 (s, 1H), 8.34 (s, 1H), 7.38 – 7.34 (m, 1H), 7.31 – 7.27 (m, 3H), 7.26 – 7.17 (m, 3H), 7.02 – 6.99 (dd, *J* = 8.4, 1.0 Hz, 1H), 6.92 – 6.88 (m, 1H), 6.35 – 6.26 (m, 1H), 5.24 (ddd, *J* = 10.2, 1.3, 1.2 Hz, 1H), 5.12 (ddd, *J* = 17.0, 1.4, 1.2 Hz, 1H), 4.54 – 4.52 (m, 1H), 4.34 – 4.21 (m, 2H), 4.11 – 3.99 (m, 2H), 1.28 (t, *J* = 7.1 Hz, 3H), 1.10 (t, *J* = 7.1 Hz, 3H). <sup>13</sup>C NMR (101 MHz, Chloroform-*d*)  $\delta$  169.3, 167.6, 167.3, 161.1, 137.8, 136.4, 133.2, 132.5, 130.0, 128.1, 127.4, 118.94, 118.85, 118.8, 117.3, 79.1, 62.4, 62.1, 55.1, 14.0, 13.8; HRMS (ESI+) Calcd. For C<sub>23</sub>H<sub>26</sub>NO<sub>5</sub><sup>+</sup> ([M+H]<sup>+</sup>): 396.1805, found: 396.1805. The product was analyzed by HPLC to determine the enantiomeric excess: 93% ee (Chiralpak IE, *i*-propanol/hexane = 5/95 flow rate 1.0 mL/min,  $\lambda$  = 254 nm); *t<sub>r</sub>* = 8.83 and 10.33 min.

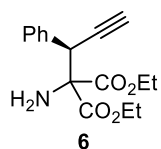

**diethyl (*R*)-2-amino-2-(1-phenylprop-2-yn-1-yl)malonate (6):** 69.4 mg, 80% yield, yellow oil;  $^1\text{H}$  NMR (400 MHz, Chloroform-*d*)  $\delta$  7.50 – 7.43 (m, 2H), 7.34 – 7.27 (m, 3H), 4.79 (d,  $J = 2.5$  Hz, 1H), 4.40 – 4.26 (m, 2H), 4.15 – 4.02 (m, 2H), 2.33 (d,  $J = 2.5$  Hz, 1H), 2.12 (brs, 2H), 1.34 (t,  $J = 7.1$  Hz, 3H), 1.18 (t,  $J = 7.1$  Hz, 3H).  $^{13}\text{C}$  NMR (101 MHz, Chloroform-*d*)  $\delta$  169.4, 168.6, 135.2, 129.5, 128.2, 128.0, 82.0, 72.7, 70.1, 62.5, 62.3, 43.5, 14.0, 13.8. HRMS (ESI+) Calcd. For  $\text{C}_{16}\text{H}_{20}\text{NO}_4^+$  ( $[\text{M}+\text{H}]^+$ ): 290.1388, found: 290.1385.

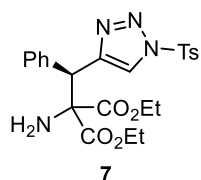

**diethyl (*R*)-2-amino-2-(phenyl(1-tosyl-1H-1,2,3-triazol-4-yl)methyl)malonate (7):** 69.1 mg, 71% yield, white solid, mp 88–90 °C;  $[\alpha]_D^{32} = 77.00$  ( $c$  0.90,  $\text{CH}_2\text{Cl}_2$ );  $^1\text{H}$  NMR (400 MHz, Chloroform-*d*)  $\delta$  8.30 (s, 1H), 8.00 – 7.90 (m, 2H), 7.37 – 7.34 (m, 4H), 7.27 – 7.24 (m, 2H), 5.35 (s, 1H), 4.12 – 4.01 (m, 4H), 2.44 (s, 3H), 1.17 (t,  $J = 7.1$  Hz, 3H), 0.99 (t,  $J = 7.1$  Hz, 3H).  $^{13}\text{C}$  NMR (101 MHz, Chloroform-*d*)  $\delta$  169.6, 169.5, 147.2, 147.1, 136.4, 133.1, 130.3, 129.7, 128.6, 128.4, 127.8, 122.6, 69.8, 62.5, 62.4, 47.6, 21.8, 13.9, 13.6. HRMS (ESI+) Calcd. For  $\text{C}_{23}\text{H}_{27}\text{N}_4\text{O}_6\text{S}^+$  ( $[\text{M}+\text{H}]^+$ ): 487.1646, found: 487.1646. The product was analyzed by HPLC to determine the enantiomeric excess: 93% ee (Chiralcel AS-H, *i*-propanol/hexane = 10/90 flow rate 1.0 mL/min,  $\lambda = 220$  nm);  $t_r = 21.99$  and 25.66 min.

#### IV. Determination of Absolute Configuration of 3a'

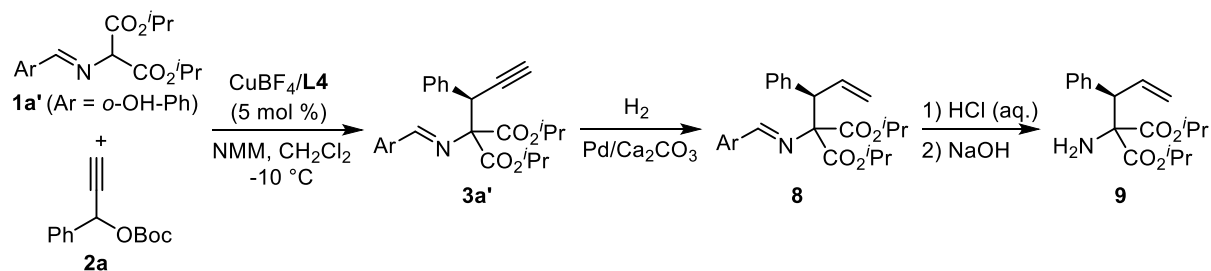

In a 10 mL Schlenk flask was placed  $\text{Cu}(\text{CH}_3\text{CN})_4\text{BF}_4$  (0.01 mmol) and **L4** (0.01 mmol) under Ar. Anhydrous DCM (1.0 mL) was added, and the mixture was magnetically stirred at room temperature for 30 min. Then the reaction flask was placed in a cool bath of  $-10\text{ }^\circ\text{C}$ , followed by addition of **1a'** (0.4 mmol), **2a** (0.4 mmol), 4-methylmorpholine (0.4 mmol) and Anhydrous DCM (1.0 mL) sequentially, and monitored by TLC analysis. After completion, the reaction was quenched with  $\text{H}_2\text{O}$  (3 mL). The aqueous layer was extracted three times with ethyl acetate (6 mL  $\times$  3). The combined organic layer was dried over  $\text{Na}_2\text{SO}_4$ . The volatile solvent was removed under reduced pressure. The residue was purified by flash chromatography on silica gel to afford pure **3a'**.

To a solution of **3a'** (0.30 mmol) in EtOH (3 mL) under nitrogen, then 10 mg Pd- $\text{CaCO}_3$  was added. The reaction mixture was stirred under  $\text{H}_2$  atmosphere (1 atm) at  $25\text{ }^\circ\text{C}$  for 3d.<sup>2</sup> After the reaction was completed (monitored by TLC), the crude reaction mixture was filtered over a short pad of celite and washed with EtOAc. The solvents were removed under reduced pressure. Then the residue was purified by silica gel column chromatography to afford the desired product **8**.

To a solution of **8** (0.20 mmol) in THF (1 mL), then 1 mL 2 M HCl was added. The reaction mixture was stirred at  $25\text{ }^\circ\text{C}$  for 2h. After the reaction was complete (monitored by TLC), THF was removed under reduced pressure. The crude reaction mixture was extracted with EtOAc (3  $\times$  3 mL) and the aqueous solution was added with 10% NaOH until pH = 10, then the crude reaction mixture was extracted with DCM (3  $\times$  3 mL), the organics were combined and dried over  $\text{Na}_2\text{SO}_4$  and concentrated under vacuum and purified by silica-gel flash chromatography to afford the desired product **9**;  $[\alpha]^{32}_{\text{D}} = -50.6$  (*c* 0.89,  $\text{CH}_2\text{Cl}_2$ ).

Compared with the results in the literature<sup>1</sup>, the absolute configuration of **9** is determined to be *R*.

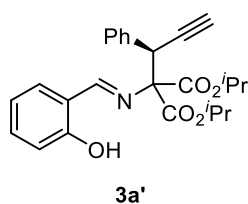

**diisopropyl (R,E)-2-((2-hydroxybenzylidene)amino)-2-(1-phenylprop-2-yn-1-yl)malonate (3a')**: 71% yield, yellow liquid;  $^1\text{H}$  NMR (400 MHz, Chloroform-*d*)  $\delta$  13.12 (s, 1H), 8.45 (s, 1H), 7.40 – 7.32 (m, 3H), 7.32 – 7.22 (m, 4H), 7.03 – 7.01 (m, 1H), 6.93 – 6.89 (m, 1H), 5.24 – 5.15 (m, 1H), 4.95 – 4.86 (m, 1H), 4.84 (d,  $J = 2.5$  Hz, 1H), 2.41 (d,  $J = 2.5$  Hz, 1H), 1.30 (d,  $J = 6.0$  Hz, 3H), 1.29 (d,  $J = 6.0$  Hz, 3H), 1.21 (d,  $J = 6.3$  Hz, 3H), 1.06 (d,  $J = 6.3$  Hz, 3H).  $^{13}\text{C}$  NMR (101 MHz, Chloroform-*d*)  $\delta$  169.0, 166.4, 166.0, 161.1, 135.2, 133.2, 132.5, 129.8, 128.2, 128.1, 118.9, 118.7, 117.4, 82.2, 78.4, 74.1, 70.7, 70.5, 44.5, 21.6, 21.5, 21.4, 21.3. The product was analyzed by HPLC to determine the enantiomeric excess: 65% ee (Chiralpak AD-H, *i*-propanol/hexane = 5/95 flow rate 1.0 mL/min,  $\lambda = 262$  nm);  $t_r = 16.01$  and 19.99 min.

## V. Reference

1. R.-Q. Wang, C. Shen, X. Cheng, Z.-F. Wang, H.-Y. Tao, X.-Q. Dong, C.-J. Wang, *Chin. J. Chem.* **2020**, *38*, 807.
2. W. Shao, H. Li, C. Liu, C.-J. Liu, S.-L. You, *Angew. Chem. Int. Ed.* **2015**, *54*, 7684.
3. Q. Zhu, B. Meng, C. Gu, Y. Xu, J. Chen, C. Lei, X. Wu, *Org. Lett.* **2019**, *21*, 9985.

## VI. NMR and HPLC Spectra

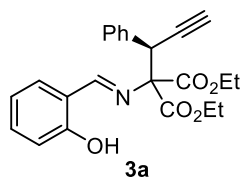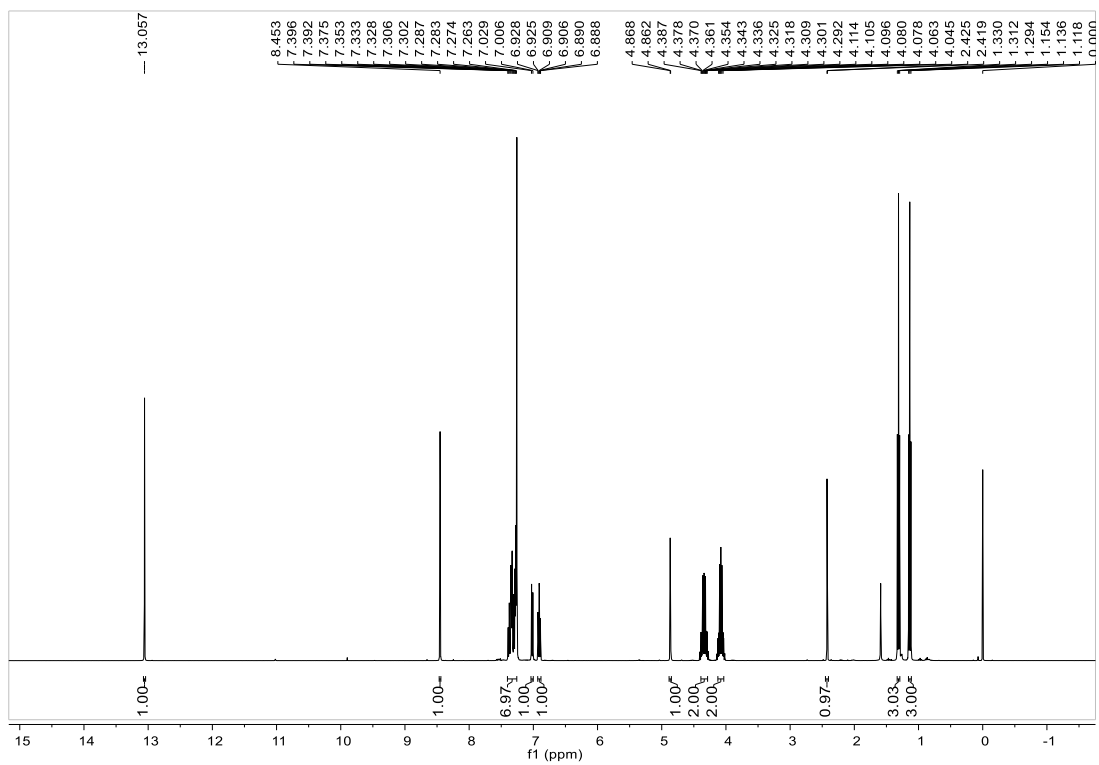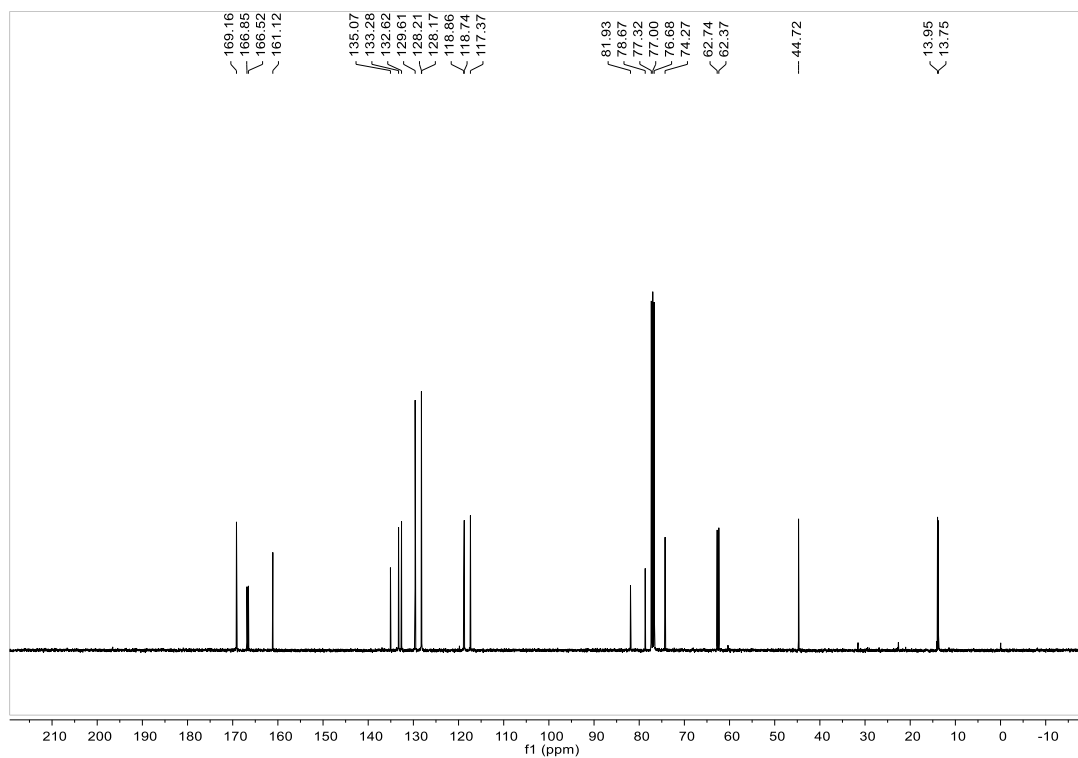



```

=====
Acq. Operator   : SYSTEM                      Seq. Line :    1
Acq. Instrument : 1260                      Location  :   55
Injection Date  : 10/16/2019 12:58:31 PM    Inj       :    1
                                           Inj Volume: 10.000 µl
Acq. Method     : E:\DATA\WRQ\WRQ-04-94\WRQ-04-94-IE-98 2019-10-16 12-56-55\WRQ-4-IE-98-2-DAD
                  -1ML.M
Last changed    : 10/16/2019 12:56:55 PM by SYSTEM
Analysis Method : E:\DATA\WRQ\WRQ-04-94\WRQ-04-94-IE-98 2019-10-16 12-56-55\WRQ-4-IE-98-2-DAD
                  -1ML.M (Sequence Method)
Last changed    : 7/21/2020 9:28:42 PM by SYSTEM
                  (modified after loading)
Additional Info : Peak(s) manually integrated
  
```

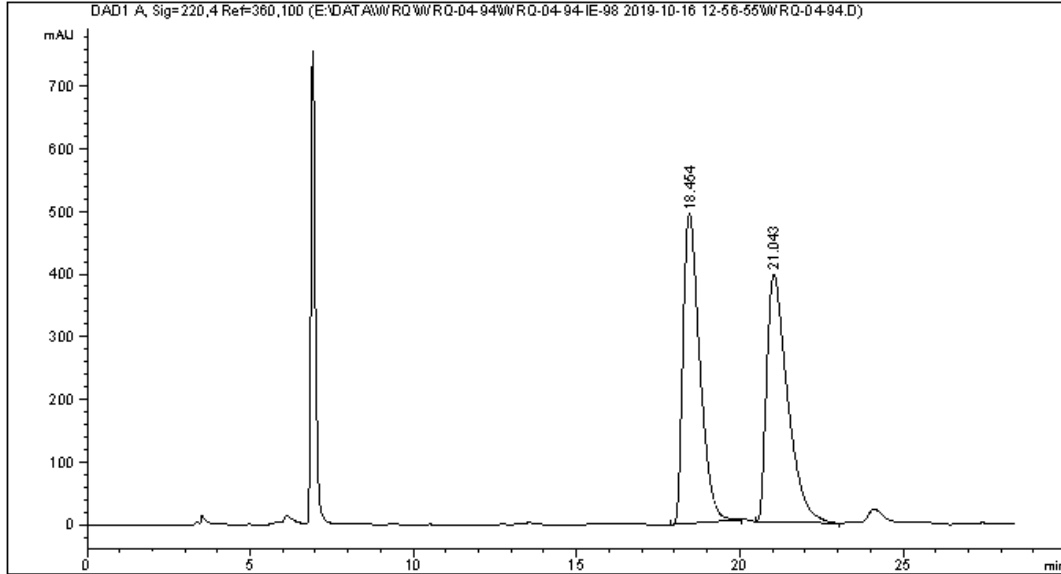

=====  
 Area Percent Report  
 =====

```

Sorted By       :      Signal
Multiplier      :      1.0000
Dilution       :      1.0000
Do not use Multiplier & Dilution Factor with ISTDs
  
```

Signal 1: DAD1 A, Sig=220,4 Ref=360,100

| Peak # | RetTime [min] | Type | Width [min] | Area [mAU*s] | Height [mAU] | Area %  |
|--------|---------------|------|-------------|--------------|--------------|---------|
| 1      | 18.454        | BB   | 0.5397      | 1.75740e4    | 494.36200    | 49.9957 |
| 2      | 21.043        | BB   | 0.6629      | 1.75770e4    | 395.17868    | 50.0043 |

Totals :                    3.51509e4    889.54068

Data File E:\DATA\WRQ\WRQ-04-109\WRQ-04-109-1 2019-10-31 16-48-56\WRQ-04-109.D  
 Sample Name: WRQ-04-109-1

```

=====
Acq. Operator   : SYSTEM                      Seq. Line :    1
Acq. Instrument : 1260                        Location  :   51
Injection Date  : 10/31/2019 4:50:27 PM      Inj       :    1
                                           Inj Volume: 10.000 µl

Acq. Method    : E:\DATA\WRQ\WRQ-04-109\WRQ-04-109-1 2019-10-31 16-48-56\WRQ-4-IE-98-2-DAD-
                LML.M
Last changed   : 10/31/2019 4:48:56 PM by SYSTEM
Analysis Method : E:\DATA\WRQ\WRQ-04-109\WRQ-04-109-1 2019-10-31 16-48-56\WRQ-4-IE-98-2-DAD-
                LML.M (Sequence Method)
Last changed   : 7/21/2020 9:26:59 PM by SYSTEM
                (modified after loading)
Additional Info : Peak(s) manually integrated
  
```

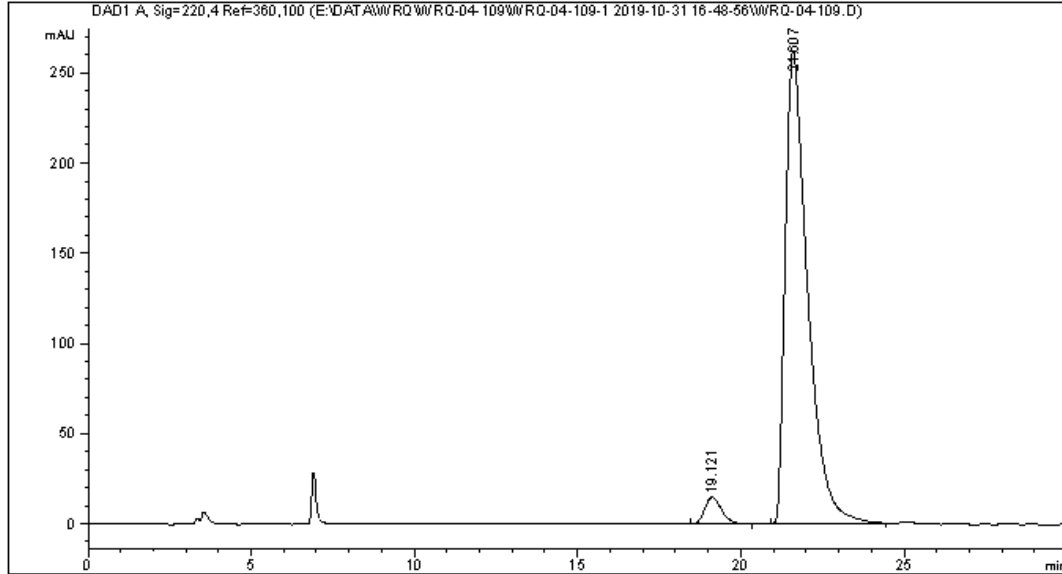

=====  
 Area Percent Report  
 =====

```

Sorted By      :      Signal
Multiplier     :      1.0000
Dilution       :      1.0000
Do not use Multiplier & Dilution Factor with ISTDs
  
```

Signal 1: DAD1 A, Sig=220,4 Ref=360,100

| Peak # | RetTime [min] | Type | Width [min] | Area [mAU*s] | Height [mAU] | Area %  |
|--------|---------------|------|-------------|--------------|--------------|---------|
| 1      | 19.121        | BB   | 0.4871      | 531.76917    | 14.59544     | 4.1155  |
| 2      | 21.607        | BB   | 0.6855      | 1.23893e4    | 261.62451    | 95.8845 |

Totals :                    1.29210e4   276.21995

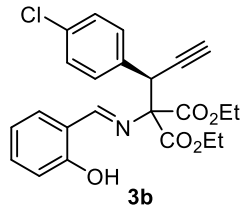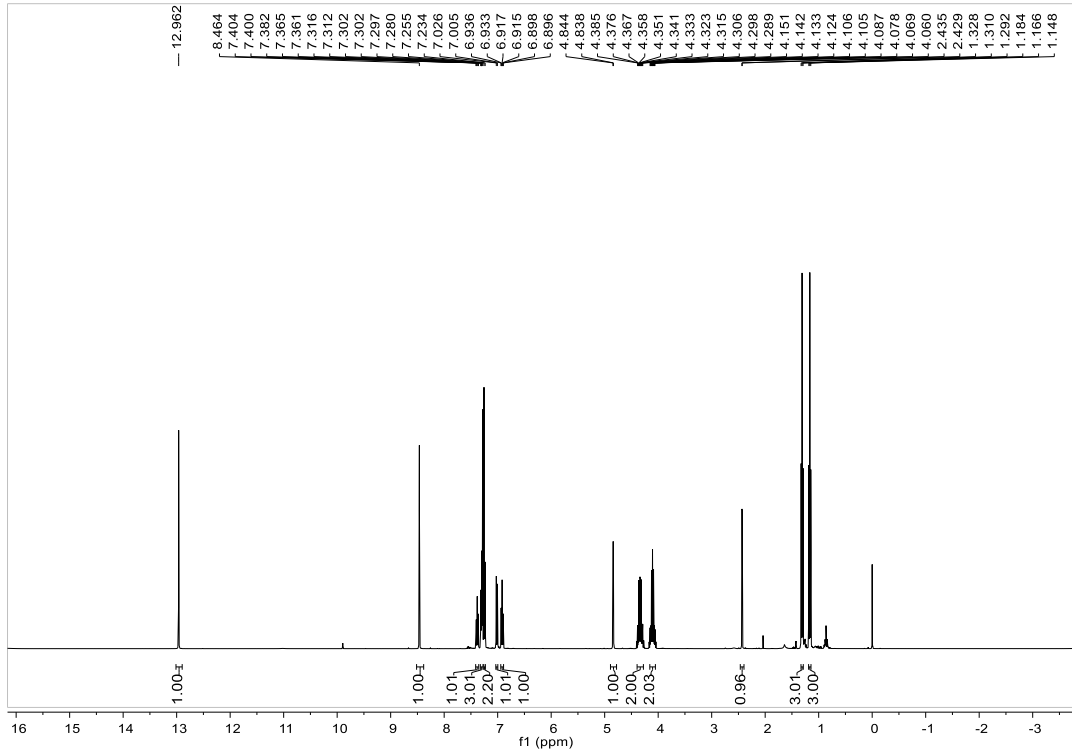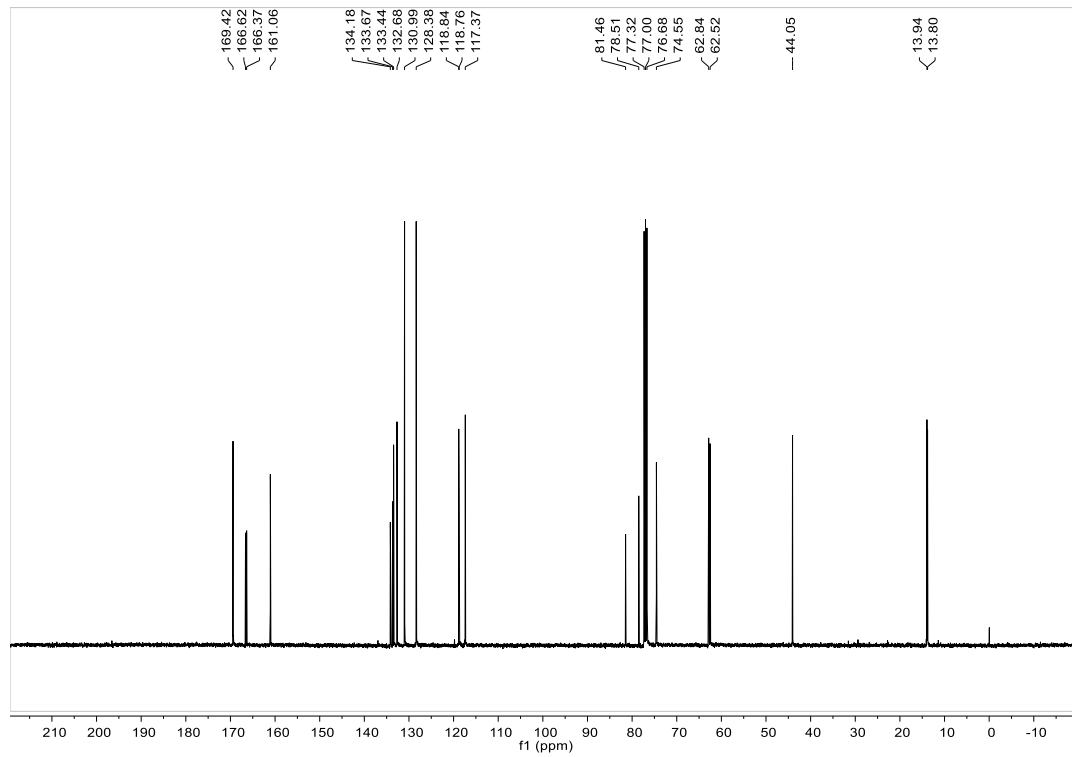

Data File E:\DATA\WRQ\WRQ-05--05\WRQ-05-05-06-95-5 2019-12-18 01-01-11\WRQ-05--05.D  
 Sample Name: WRQ-05-05-C1-rac

```

=====
Acq. Operator   : SYSTEM                      Seq. Line :    1
Acq. Instrument : 1260                       Location  :   51
Injection Date  : 12/18/2019 1:02:38 AM      Inj       :    1
                                           Inj Volume: 10.000 µl

Acq. Method     : E:\DATA\WRQ\WRQ-05--05\WRQ-05-05-06-95-5 2019-12-18 01-01-11\WRQ-2-95-5-DAD
                  -1ML-60MIN.M
Last changed    : 12/18/2019 1:01:11 AM by SYSTEM
Analysis Method : E:\DATA\WRQ\WRQ-05--05\WRQ-05-05-06-95-5 2019-12-18 01-01-11\WRQ-2-95-5-DAD
                  -1ML-60MIN.M (Sequence Method)
Last changed    : 7/21/2020 8:07:05 PM by SYSTEM
                  (modified after loading)
  
```

Additional Info : Peak(s) manually integrated

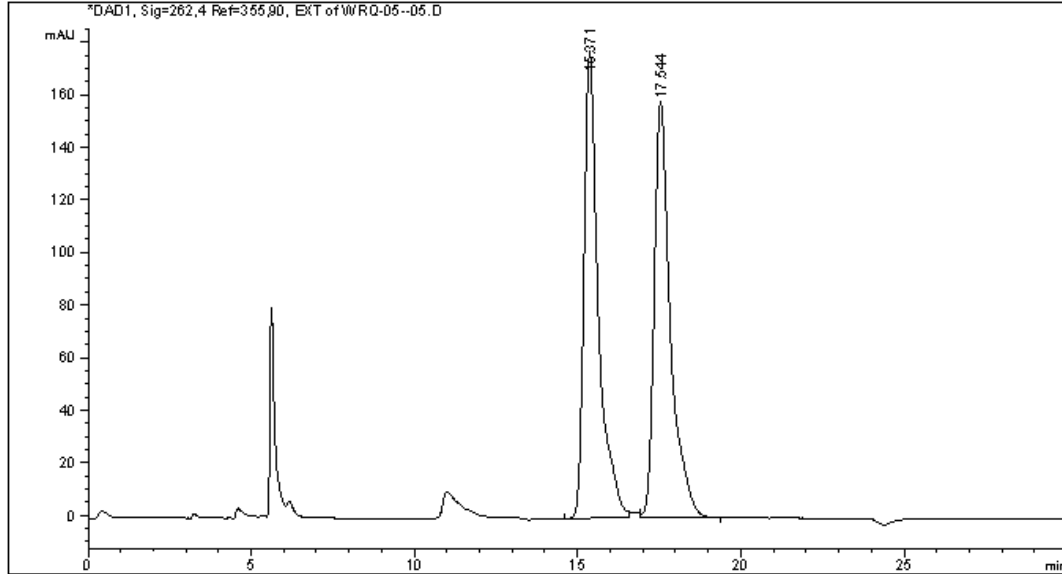

=====  
 Area Percent Report  
 =====

```

Sorted By      :      Signal
Multiplier     :      1.0000
Dilution      :      1.0000
Do not use Multiplier & Dilution Factor with ISTDs
  
```

Signal 1: DAD1, Sig=262,4 Ref=355,90, EXT  
 Signal has been modified after loading from rawdata file!

| Peak # | RetTime [min] | Type | Width [min] | Area [mAU*s] | Height [mAU] | Area %  |
|--------|---------------|------|-------------|--------------|--------------|---------|
| 1      | 15.371        | MF R | 0.5119      | 5449.81299   | 177.45215    | 50.0770 |
| 2      | 17.544        | FM R | 0.5726      | 5433.06006   | 158.14549    | 49.9230 |

Totals :                    1.08829e4    335.59764

Data File E:\DATA\WRQ\WRQ-05--07\WRQ-05-07-8-9-10 2019-12-19 23-03-29\WRQ-05-07.D  
 Sample Name: WRQ-05-07

```

=====
Acq. Operator   : SYSTEM                      Seq. Line :    1
Acq. Instrument : 1260                        Location  :   53
Injection Date  : 12/19/2019 11:04:59 PM      Inj       :    1
                                           Inj Volume: 5.000 µl

Acq. Method     : E:\DATA\WRQ\WRQ-05--07\WRQ-05-07-8-9-10 2019-12-19 23-03-29\WRQ-2-95-5-DAD-
                  LML-30MIN.M
Last changed    : 12/19/2019 11:03:29 PM by SYSTEM
Analysis Method : E:\DATA\WRQ\WRQ-05--07\WRQ-05-07-8-9-10 2019-12-19 23-03-29\WRQ-2-95-5-DAD-
                  LML-30MIN.M (Sequence Method)
Last changed    : 7/21/2020 8:10:39 PM by SYSTEM
                  (modified after loading)
  
```

Additional Info : Peak(s) manually integrated

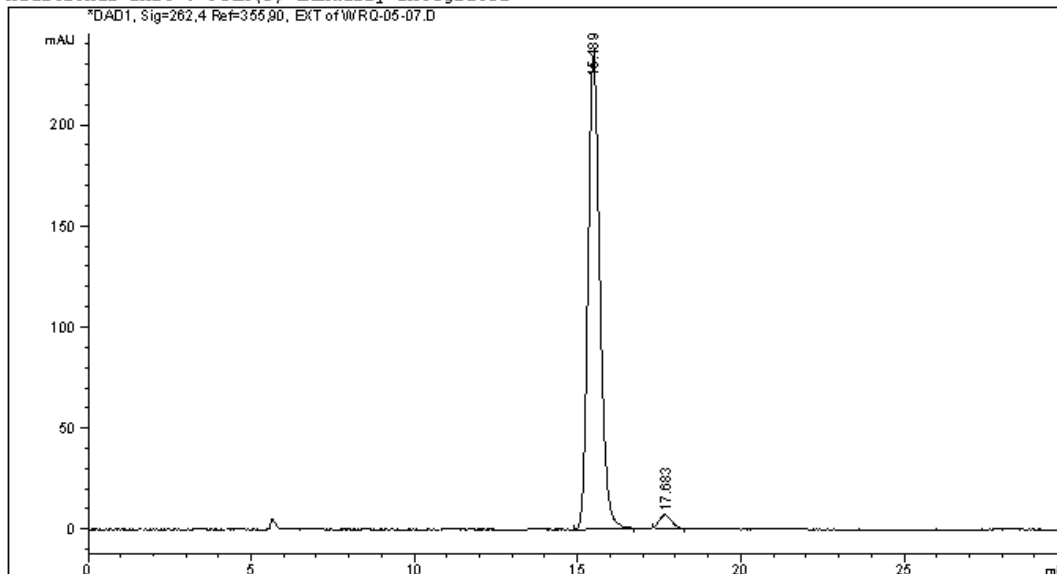

=====  
 Area Percent Report  
 =====

```

Sorted By       :      Signal
Multiplier      :      1.0000
Dilution        :      1.0000
Do not use Multiplier & Dilution Factor with ISTDs
  
```

Signal 1: DAD1, Sig=262,4 Ref=355,90, EXT  
 Signal has been modified after loading from rawdata file!

| Peak # | RetTime [min] | Type | Width [min] | Area [mAU*s] | Height [mAU] | Area %  |
|--------|---------------|------|-------------|--------------|--------------|---------|
| 1      | 15.489        | MM R | 0.4238      | 5945.11084   | 233.81195    | 97.1726 |
| 2      | 17.683        | MM R | 0.4397      | 172.98402    | 6.55733      | 2.8274  |

Totals :                    6118.09486   240.36928

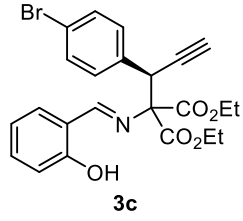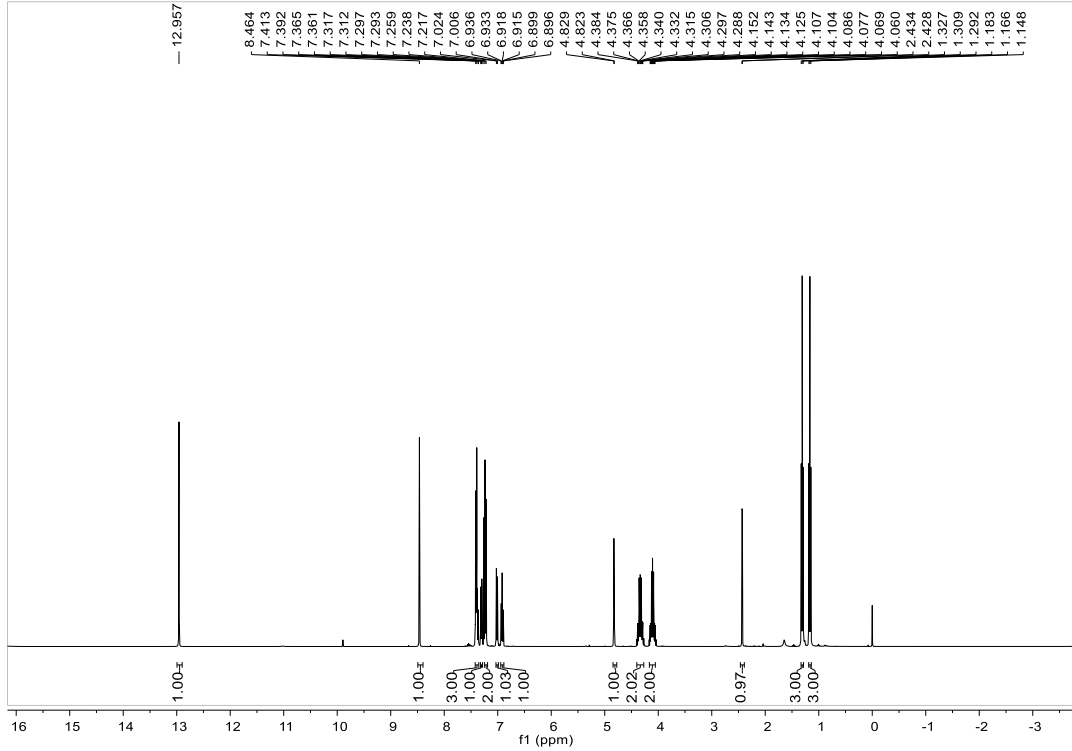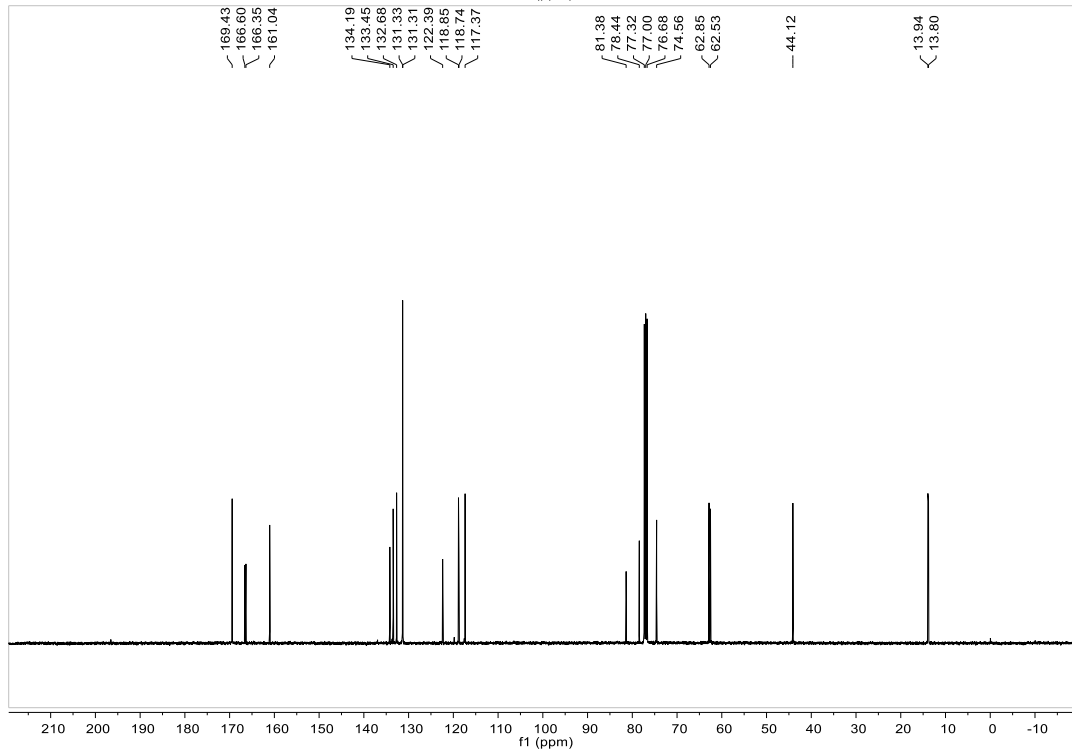

Data File E:\DATA\WRQ\WRQ-05-17-18\WRQ-05-17-18 2019-12-28 23-09-37\WRQ-05-17-181.D  
 Sample Name: WRQ-05-18

```

=====
Acq. Operator   : SYSTEM                      Seq. Line :    2
Acq. Instrument : 1260                       Location  :   52
Injection Date  : 12/28/2019 11:42:31 PM    Inj       :    1
                                           Inj Volume: 7.000 µl

Acq. Method     : E:\DATA\WRQ\WRQ-05-17-18\WRQ-05-17-18 2019-12-28 23-09-37\WRQ-2-95-5-DAD-
                  LML-30MIN.M
Last changed    : 12/28/2019 11:09:37 PM by SYSTEM
Analysis Method : E:\DATA\WRQ\WRQ-05-17-18\WRQ-05-17-18 2019-12-28 23-09-37\WRQ-2-95-5-DAD-
                  LML-30MIN.M (Sequence Method)
Last changed    : 7/21/2020 8:56:14 PM by SYSTEM
                  (modified after loading)
  
```

Additional Info : Peak(s) manually integrated

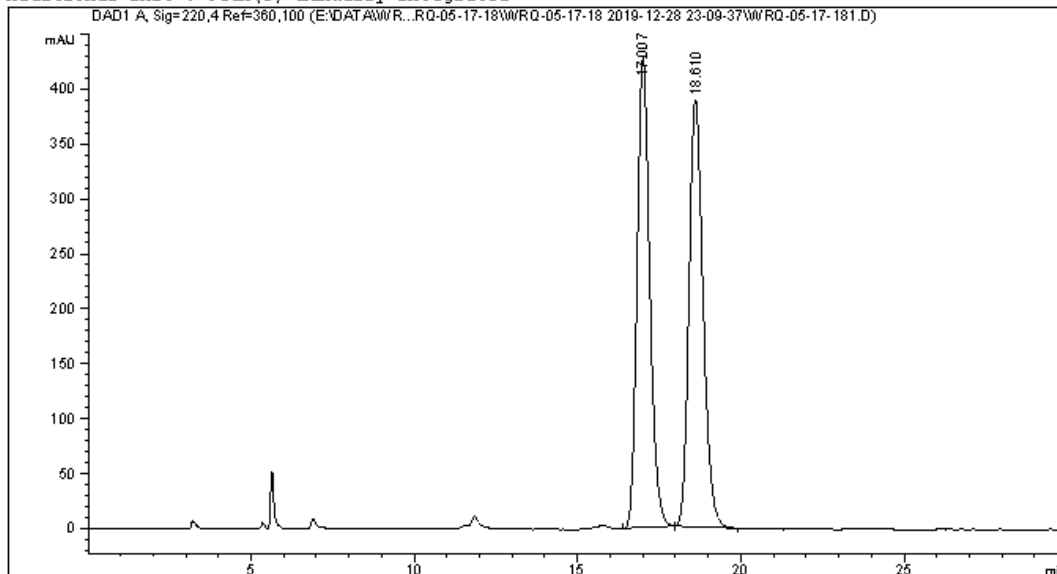

=====  
 Area Percent Report  
 =====

```

Sorted By       :      Signal
Multiplier      :      1.0000
Dilution        :      1.0000
Do not use Multiplier & Dilution Factor with ISTDs
  
```

Signal 1: DAD1 A, Sig=220,4 Ref=360,100

| Peak # | RetTime [min] | Type | Width [min] | Area [mAU*s] | Height [mAU] | Area %  |
|--------|---------------|------|-------------|--------------|--------------|---------|
| 1      | 17.007        | BB   | 0.4115      | 1.15967e4    | 428.87823    | 49.8109 |
| 2      | 18.610        | BB   | 0.4627      | 1.16848e4    | 388.71231    | 50.1891 |

Totals :                    2.32815e4   817.59055

```

=====
Acq. Operator   : SYSTEM                      Seq. Line :    1
Acq. Instrument : 1260                       Location  :   54
Injection Date  : 12/30/2019 5:41:13 PM      Inj       :    1
                                           Inj Volume: 7.000 µl

Acq. Method     : E:\DATA\WRQ\WRQ-05-20\WRQ-05-20 2019-12-30 17-39-45\WRQ-2-95-5-DAD-1ML-
                 30MIN.M
Last changed    : 12/30/2019 5:39:45 PM by SYSTEM
Analysis Method : E:\DATA\WRQ\WRQ-05-20\WRQ-05-20 2019-12-30 17-39-45\WRQ-2-95-5-DAD-1ML-
                 30MIN.M (Sequence Method)
Last changed    : 7/21/2020 8:52:29 PM by SYSTEM
                 (modified after loading)
Additional Info : Peak(s) manually integrated
  
```

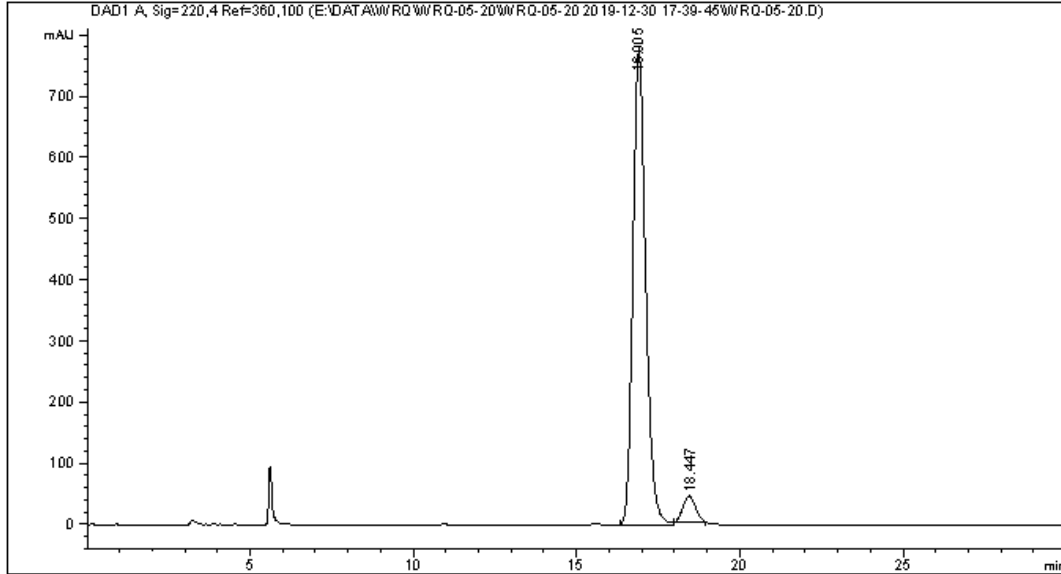

=====  
 Area Percent Report  
 =====

```

Sorted By      :      Signal
Multiplier     :      1.0000
Dilution       :      1.0000
Do not use Multiplier & Dilution Factor with ISTDs
  
```

Signal 1: DAD1 A, Sig=220,4 Ref=360,100

| Peak # | RetTime [min] | Type | Width [min] | Area [mAU*s] | Height [mAU] | Area %  |
|--------|---------------|------|-------------|--------------|--------------|---------|
| 1      | 16.905        | MM R | 0.4571      | 2.12663e4    | 775.46625    | 94.8088 |
| 2      | 18.447        | MM R | 0.4508      | 1164.42810   | 43.04722     | 5.1912  |

Totals :                    2.24307e4    818.51347



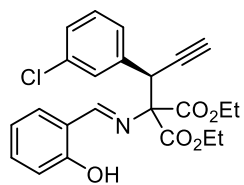

**3d**

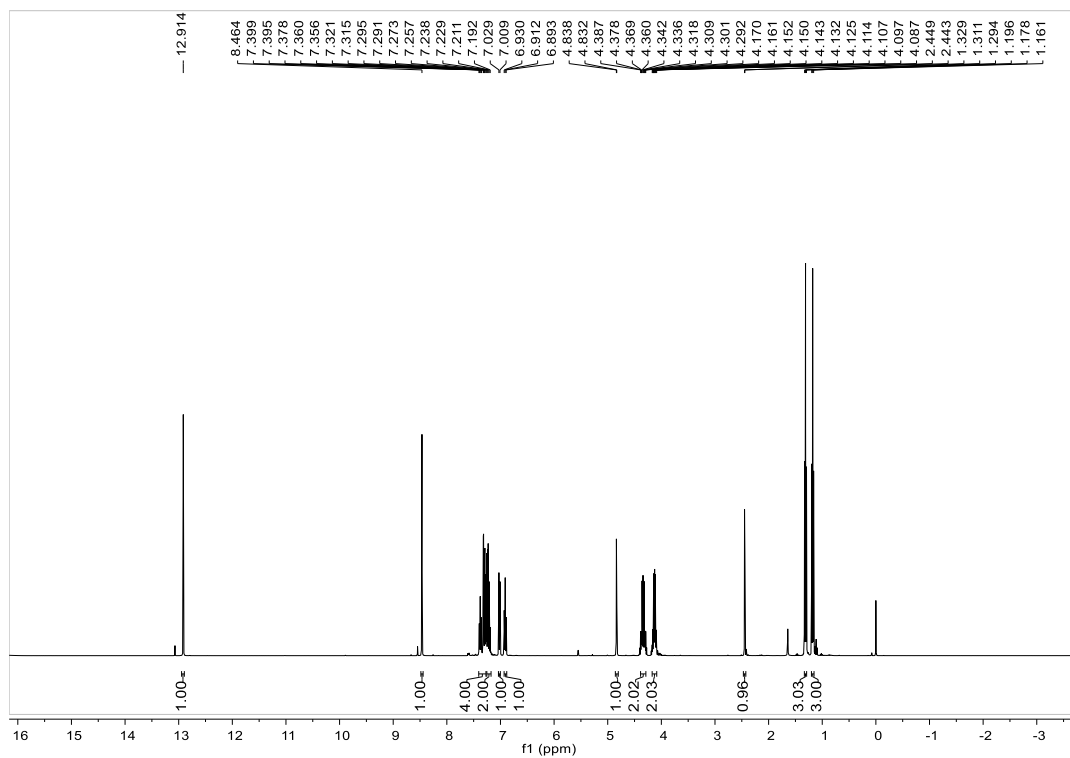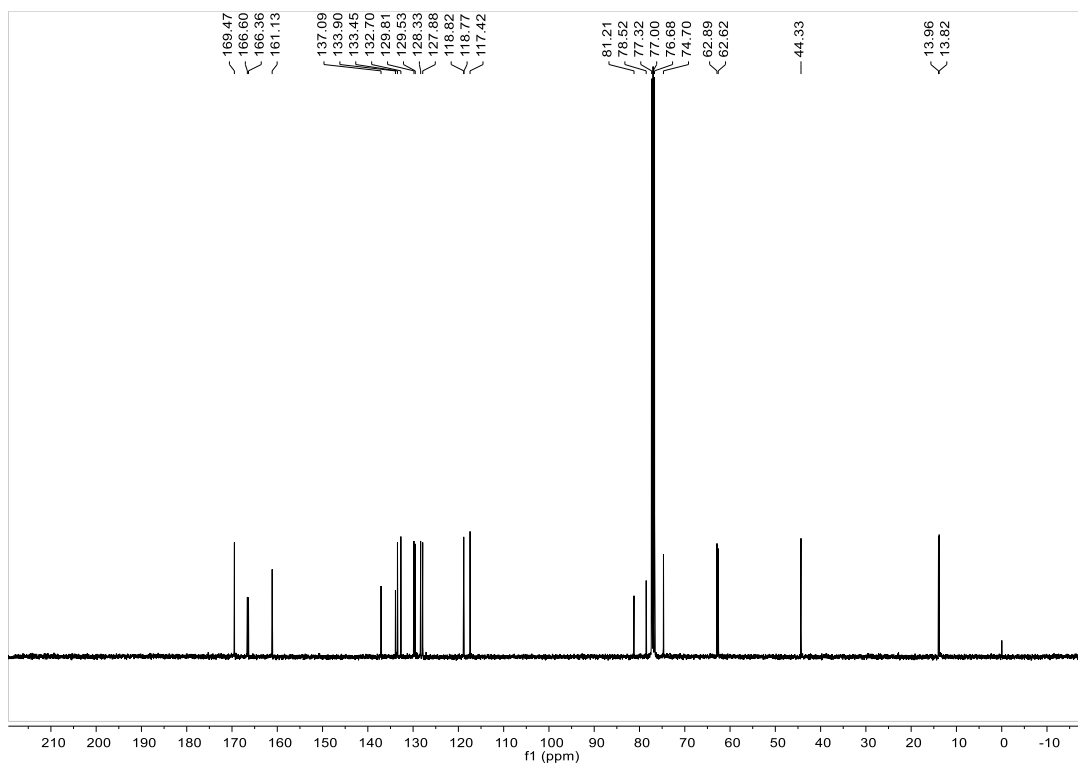



Data File E:\DATA\WRQ\WRQ-05-12-13\WRQ-05-12-13 2019-12-25 15-43-54\WRQ-05-12-13.D  
 Sample Name: WRQ-05-12-C1

```

=====
Acq. Operator   : SYSTEM                      Seq. Line :    1
Acq. Instrument : 1260                       Location  :   51
Injection Date  : 12/25/2019 3:45:22 PM      Inj       :    1
                                           Inj Volume: 7.000 µl

Acq. Method    : E:\DATA\WRQ\WRQ-05-12-13\WRQ-05-12-13 2019-12-25 15-43-54\WRQ-2-95-5-DAD-
                LML-30MIN.M
Last changed   : 12/25/2019 3:43:54 PM by SYSTEM
Analysis Method : E:\DATA\WRQ\WRQ-05-12-13\WRQ-05-12-13 2019-12-25 15-43-54\WRQ-2-95-5-DAD-
                LML-30MIN.M (Sequence Method)
Last changed   : 7/21/2020 8:33:26 PM by SYSTEM
                (modified after loading)
  
```

Additional Info : Peak(s) manually integrated

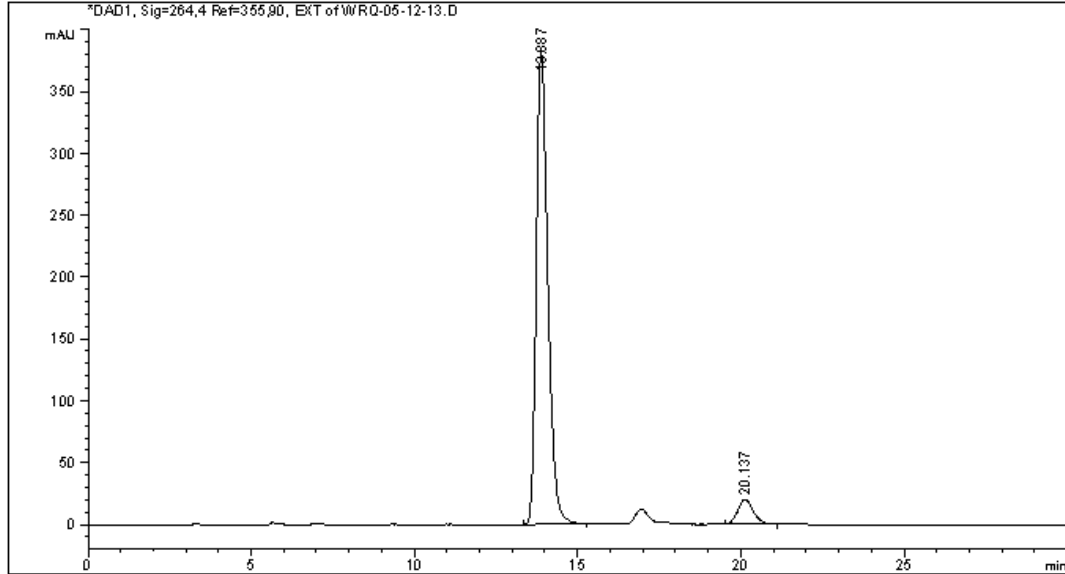

=====  
 Area Percent Report  
 =====

```

Sorted By      :      Signal
Multiplier     :      1.0000
Dilution      :      1.0000
Do not use Multiplier & Dilution Factor with ISTDs
  
```

Signal 1: DAD1, Sig=264,4 Ref=355,90, EXT  
 Signal has been modified after loading from rawdata file!

| Peak # | RetTime [min] | Type | Width [min] | Area [mAU*s] | Height [mAU] | Area %  |
|--------|---------------|------|-------------|--------------|--------------|---------|
| 1      | 13.887        | BB   | 0.3774      | 9416.22852   | 382.17908    | 93.5279 |
| 2      | 20.137        | BB   | 0.4078      | 651.60229    | 19.90847     | 6.4721  |

Totals :                    1.00678e4    402.08755

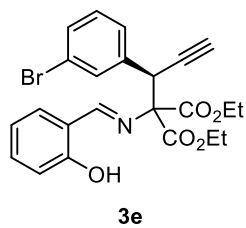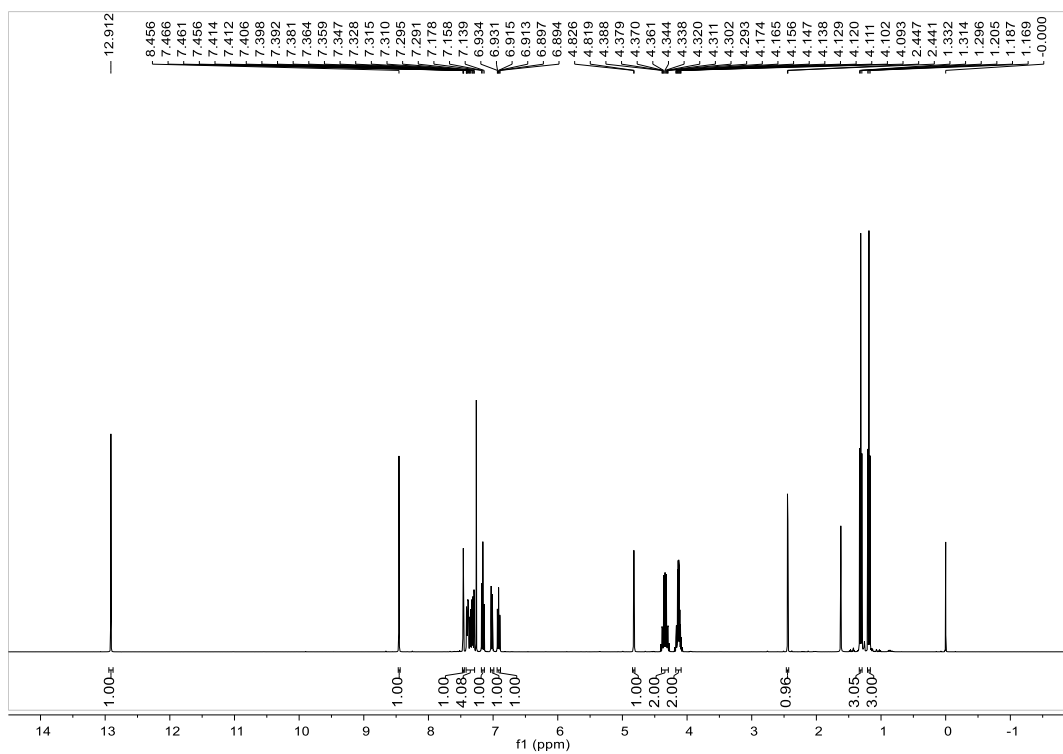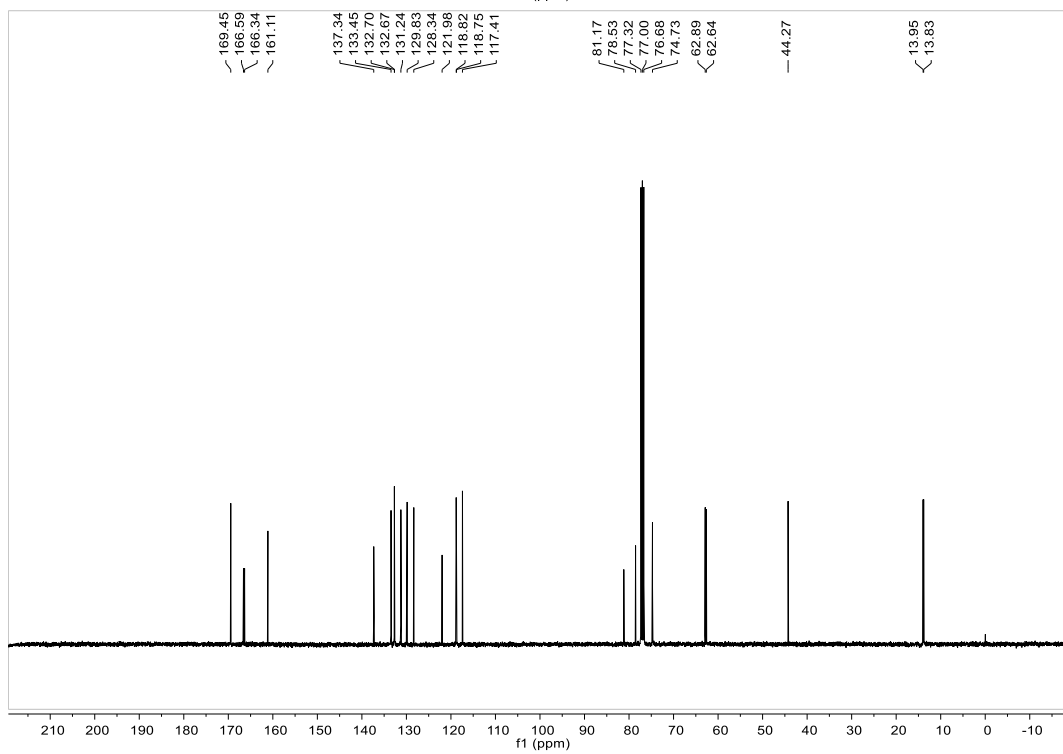

```

=====
Acq. Operator   : SYSTEM                      Seq. Line :    1
Acq. Instrument : 1260                      Location  :   65
Injection Date  : 6/19/2020 9:13:57 PM      Inj       :    1
                                           Inj Volume: 10.000 µl
Acq. Method    : E:\DATA\WRQ\WRQ-05-mBr-RAC\WRQ-05-mBr-RAC 2020-06-19 21-12-22\WRQ-2-95-5-
                DAD-1ML-40MIN.M
Last changed   : 6/19/2020 9:12:22 PM by SYSTEM
Analysis Method : E:\DATA\WRQ\WRQ-05-mBr-RAC\WRQ-05-mBr-RAC 2020-06-19 21-12-22\WRQ-2-95-5-
                DAD-1ML-40MIN.M (Sequence Method)
Last changed   : 7/20/2020 8:30:01 PM by SYSTEM
                (modified after loading)
  
```

Additional Info : Peak(s) manually integrated

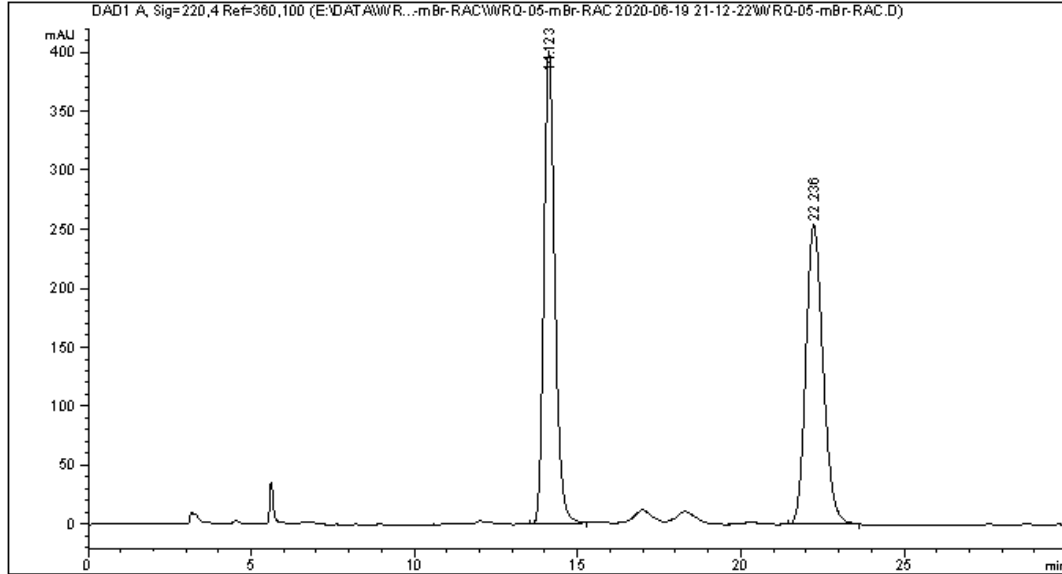

Area Percent Report

```

Sorted By      :      Signal
Multiplier     :      1.0000
Dilution      :      1.0000
Do not use Multiplier & Dilution Factor with ISTDs
  
```

Signal 1: DAD1 A, Sig=220,4 Ref=360,100

| Peak # | RetTime [min] | Type | Width [min] | Area [mAU*s] | Height [mAU] | Area %  |
|--------|---------------|------|-------------|--------------|--------------|---------|
| 1      | 14.123        | BB   | 0.3503      | 9274.55566   | 400.37326    | 49.9855 |
| 2      | 22.236        | BB   | 0.5483      | 9279.94336   | 253.95900    | 50.0145 |

Totals :                    1.85545e4    654.33226

```

=====
Acq. Operator   : SYSTEM                      Seq. Line :    1
Acq. Instrument : 1260                      Location  :   66
Injection Date  : 6/19/2020 9:47:22 PM      Inj       :    1
                                           Inj Volume: 10.000 µl
Acq. Method     : E:\DATA\WRQ\WRQ-05--mBr-S\WRQ-05-mBr-S 2020-06-19 21-45-45\WRQ-2-95-5-DAD-
                  LML-40MIN.M
Last changed    : 6/19/2020 9:45:45 PM by SYSTEM
Analysis Method : E:\DATA\WRQ\WRQ-05--mBr-S\WRQ-05-mBr-S 2020-06-19 21-45-45\WRQ-2-95-5-DAD-
                  LML-40MIN.M (Sequence Method)
Last changed    : 7/20/2020 8:28:13 PM by SYSTEM
                  (modified after loading)
  
```

Additional Info : Peak(s) manually integrated

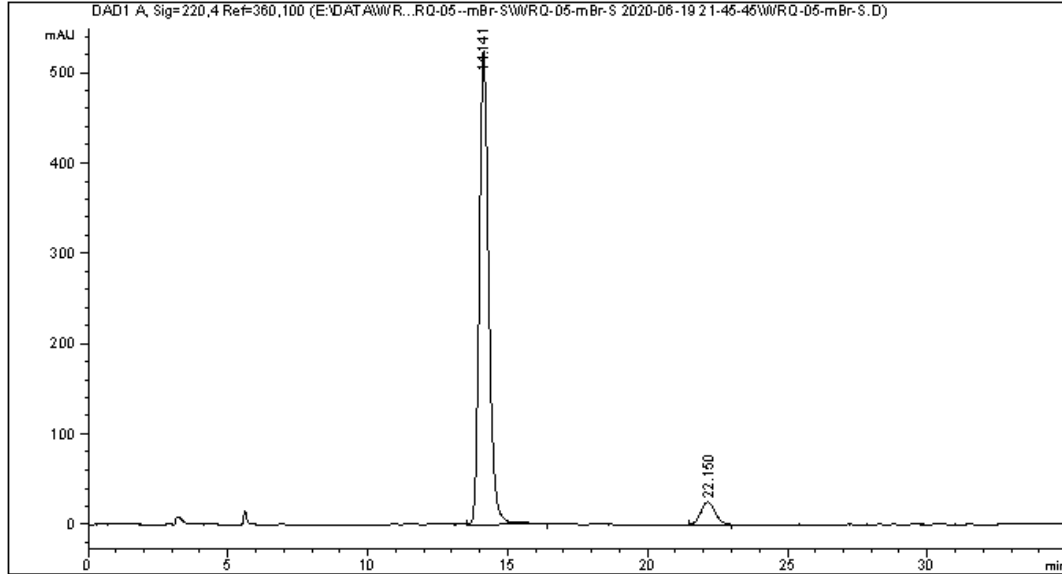

=====  
 Area Percent Report  
 =====

```

Sorted By      :      Signal
Multiplier     :      1.0000
Dilution      :      1.0000
Do not use Multiplier & Dilution Factor with ISTDs
  
```

Signal 1: DAD1 A, Sig=220,4 Ref=360,100

| Peak # | RetTime [min] | Type | Width [min] | Area [mAU*s] | Height [mAU] | Area %  |
|--------|---------------|------|-------------|--------------|--------------|---------|
| 1      | 14.141        | MM R | 0.3950      | 1.24136e4    | 523.78461    | 93.3130 |
| 2      | 22.150        | MM R | 0.6012      | 889.57928    | 24.66289     | 6.6870  |

Totals :                    1.33032e4    548.44749

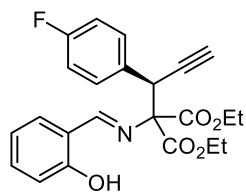

**3f**

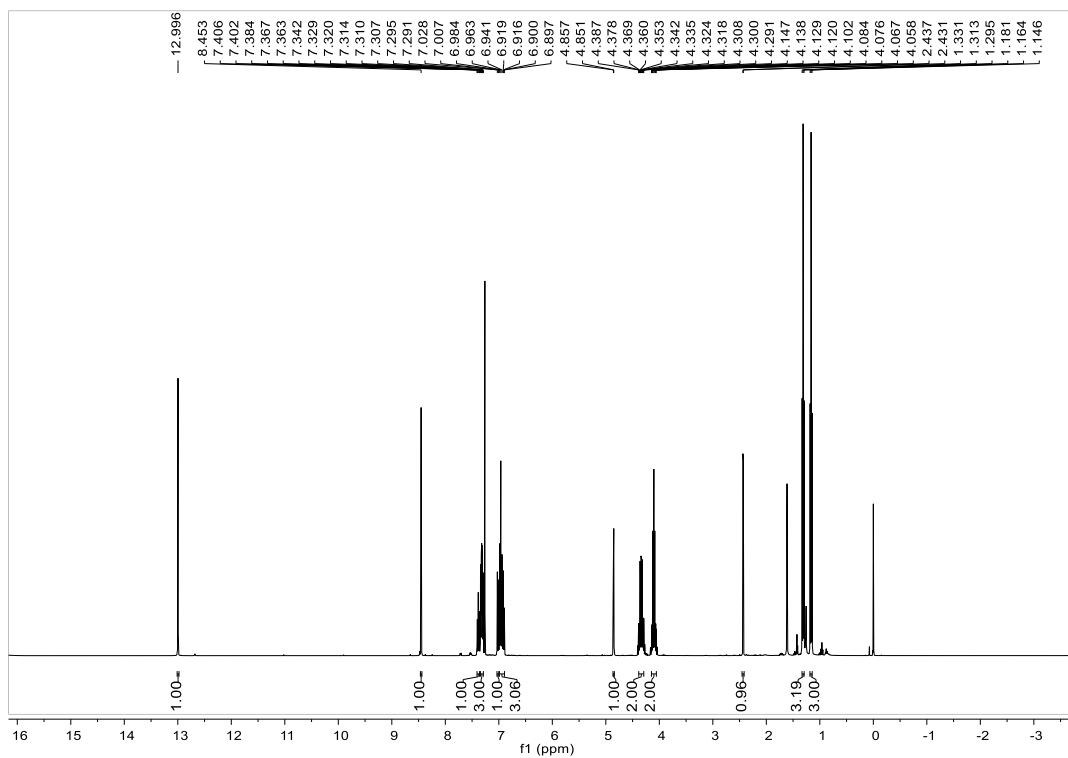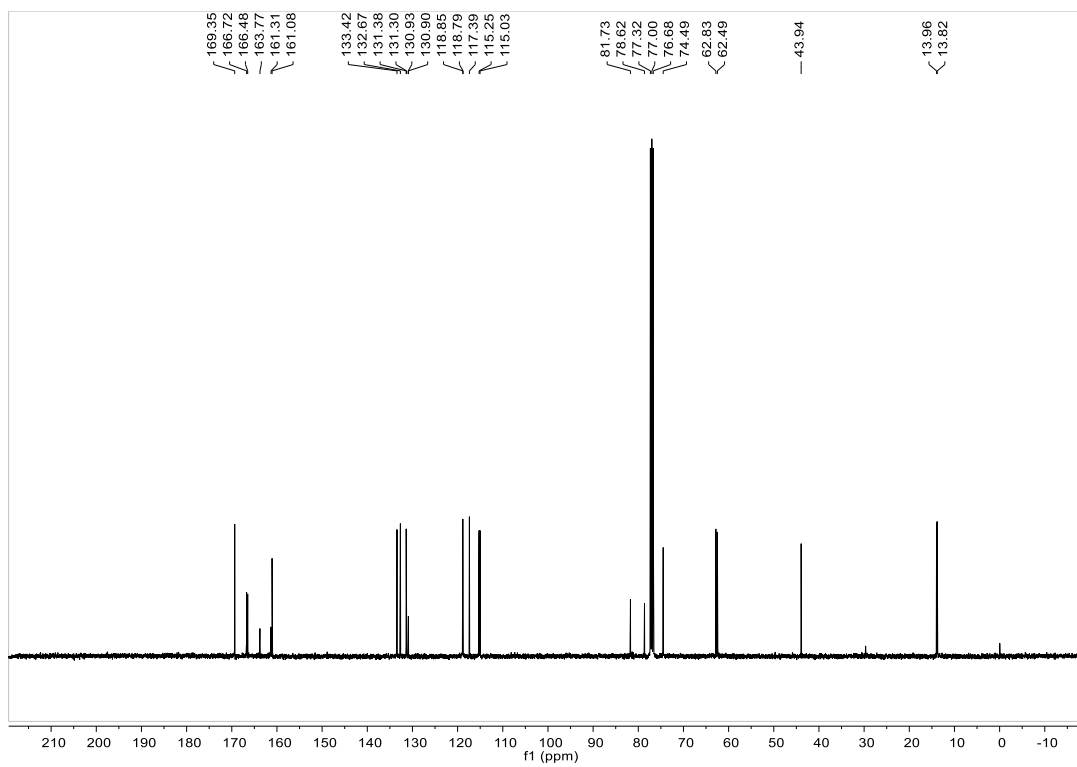

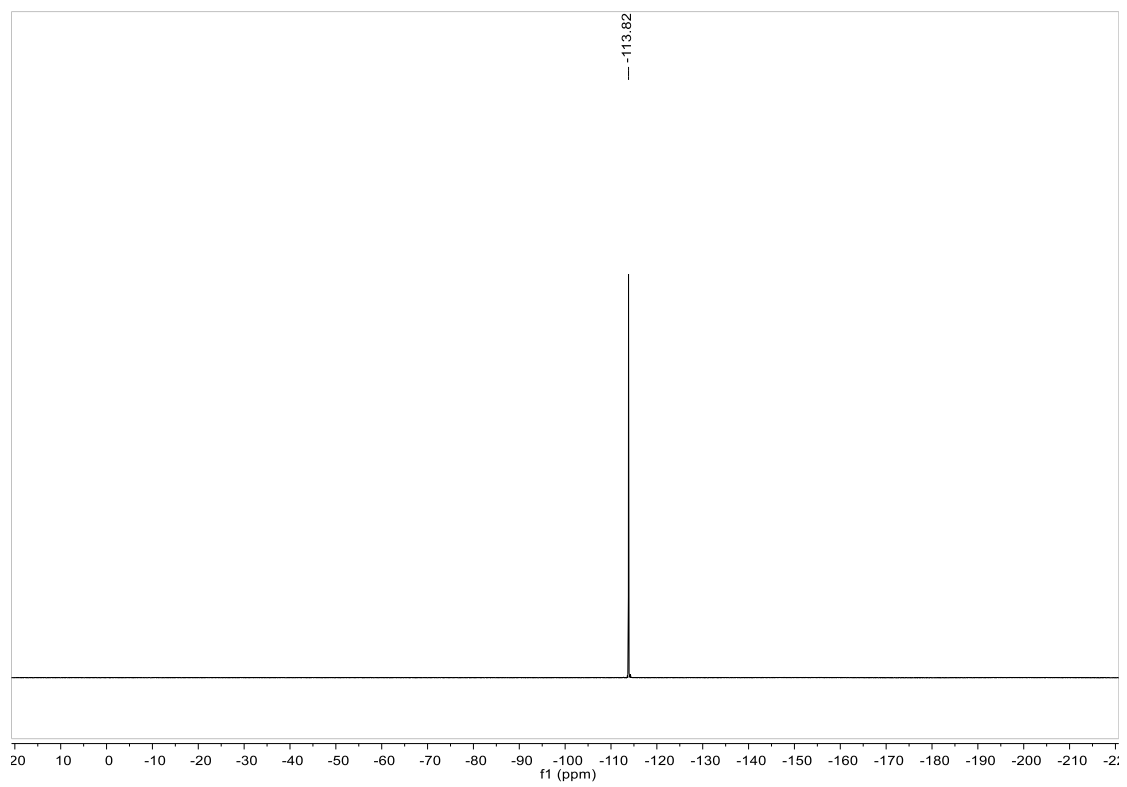



Data File E:\DATA\WRQ\WRQ-05-F-RAC\WRQ-05-F-RAC 2020-06-16 17-54-06\WRQ-05-F-RAC1.D  
 Sample Name: WRQ-05-F-RAC

```

=====
Acq. Operator   : SYSTEM                      Seq. Line :    2
Acq. Instrument : 1260                        Location  :   61
Injection Date  : 6/16/2020 6:27:01 PM       Inj       :    1
                                           Inj Volume: 10.000 µl

Acq. Method     : E:\DATA\WRQ\WRQ-05-F-RAC\WRQ-05-F-RAC 2020-06-16 17-54-06\WRQ-4-IE-95-5-DAD
                  -1ML-30MIN.M
Last changed    : 6/16/2020 5:54:06 PM by SYSTEM
Analysis Method : E:\DATA\WRQ\WRQ-05-F-RAC\WRQ-05-F-RAC 2020-06-16 17-54-06\WRQ-4-IE-95-5-DAD
                  -1ML-30MIN.M (Sequence Method)
Last changed    : 7/20/2020 8:40:11 PM by SYSTEM
                  (modified after loading)
  
```

Additional Info : Peak(s) manually integrated

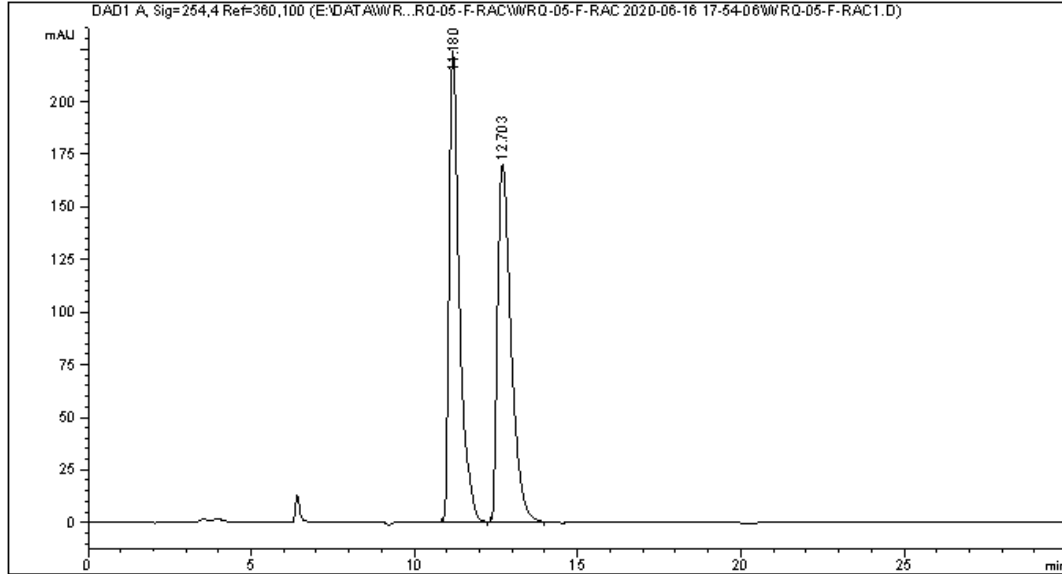

Area Percent Report

```

Sorted By      :      Signal
Multiplier     :      1.0000
Dilution       :      1.0000
Do not use Multiplier & Dilution Factor with ISTDs
  
```

Signal 1: DAD1 A, Sig=254,4 Ref=360,100

| Peak # | RetTime [min] | Type | Width [min] | Area [mAU*s] | Height [mAU] | Area %  |
|--------|---------------|------|-------------|--------------|--------------|---------|
| 1      | 11.180        | BB   | 0.3244      | 4918.21631   | 223.81128    | 50.2807 |
| 2      | 12.703        | BB   | 0.4325      | 4863.31055   | 169.64330    | 49.7193 |

Totals : 9781.52686 393.45457

```

=====
Acq. Operator   : SYSTEM                      Seq. Line :    1
Acq. Instrument : 1260                        Location  :   62
Injection Date  : 6/16/2020 7:48:15 PM       Inj       :    1
                                           Inj Volume: 10.000 µl
Acq. Method     : E:\DATA\WRQ\WRQ-05-F-S\WRQ-05-F-S 2020-06-16 19-46-40\WRQ-4-IE-95-5-DAD-1ML
                  -30MIN.M
Last changed    : 6/16/2020 7:46:40 PM by SYSTEM
Analysis Method : E:\DATA\WRQ\WRQ-05-F-S\WRQ-05-F-S 2020-06-16 19-46-40\WRQ-4-IE-95-5-DAD-1ML
                  -30MIN.M (Sequence Method)
Last changed    : 7/20/2020 8:39:30 PM by SYSTEM
                  (modified after loading)
  
```

Additional Info : Peak(s) manually integrated

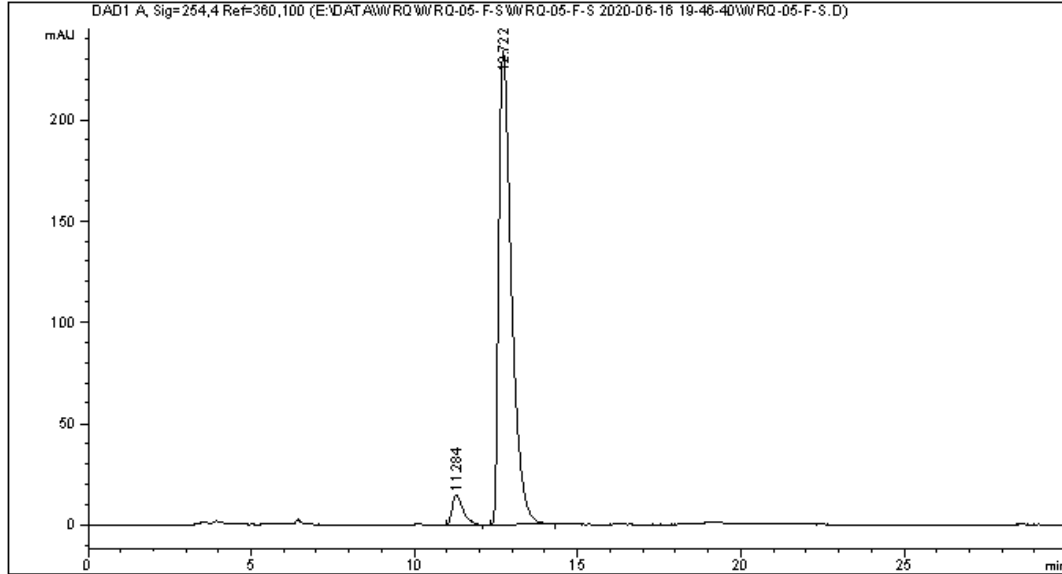

=====  
 Area Percent Report  
 =====

```

Sorted By      :      Signal
Multiplier     :      1.0000
Dilution      :      1.0000
Do not use Multiplier & Dilution Factor with ISTDs
  
```

Signal 1: DAD1 A, Sig=254,4 Ref=360,100

| Peak # | RetTime [min] | Type | Width [min] | Area [mAU*s] | Height [mAU] | Area %  |
|--------|---------------|------|-------------|--------------|--------------|---------|
| 1      | 11.284        | BB   | 0.3092      | 338.43790    | 14.56021     | 5.0712  |
| 2      | 12.722        | MM R | 0.4516      | 6335.30176   | 233.79028    | 94.9288 |

Totals :                    6673.73965   248.35049

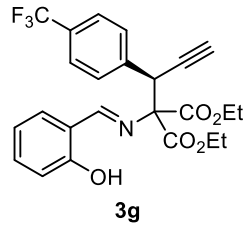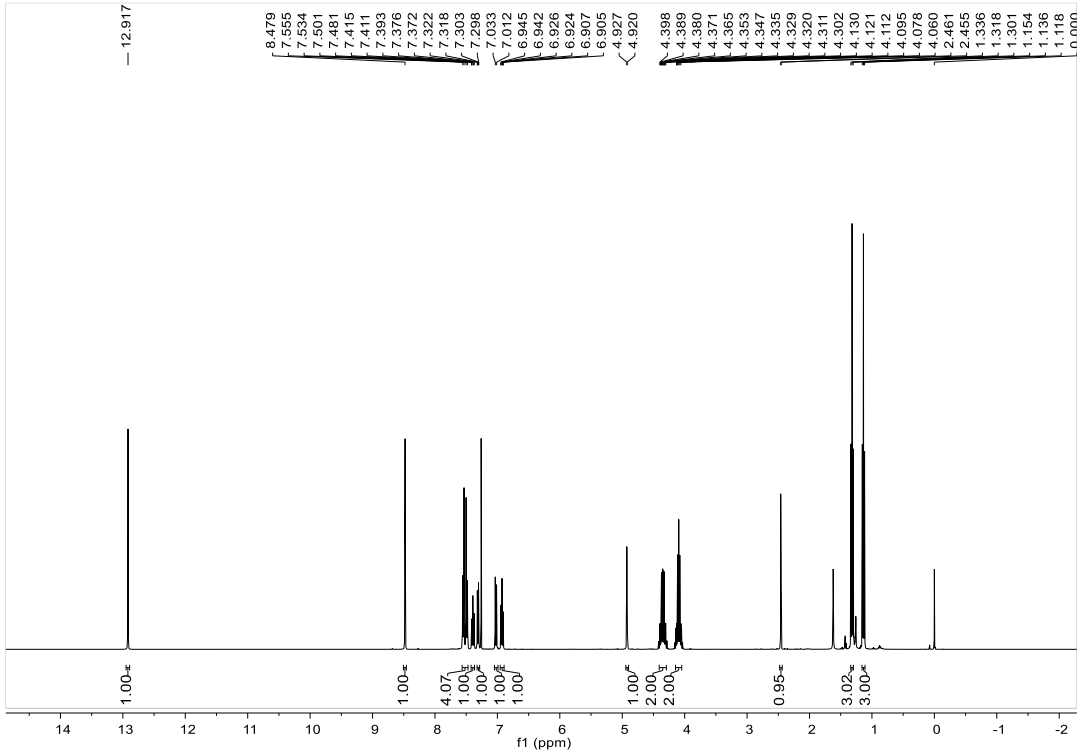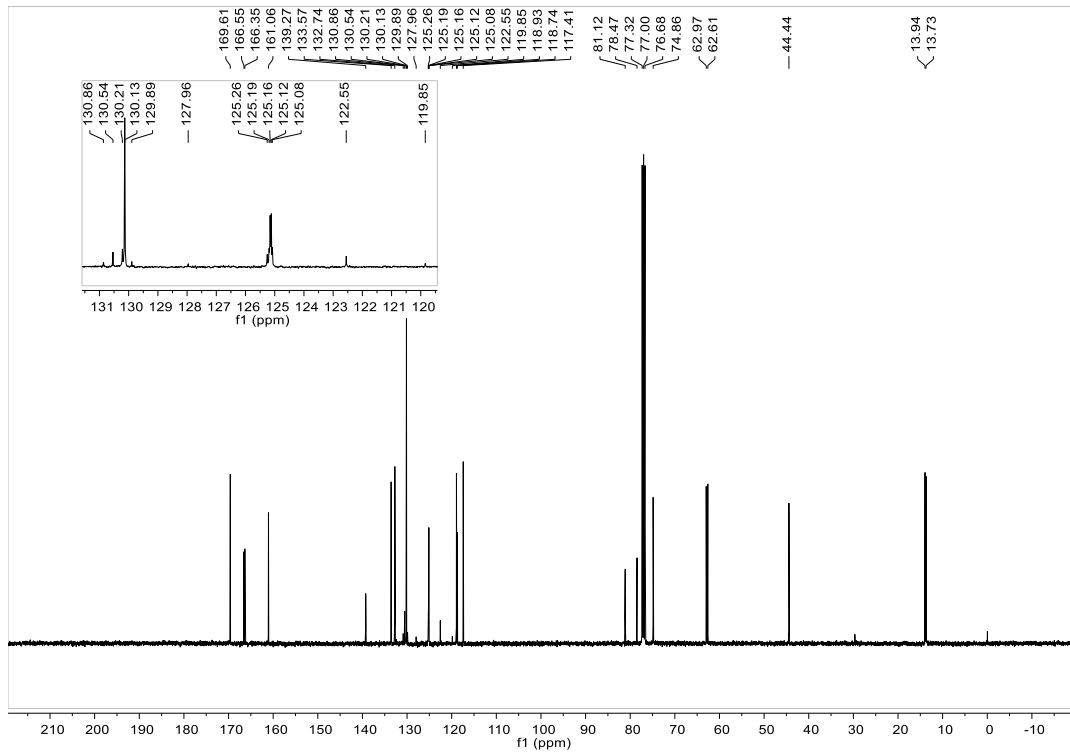

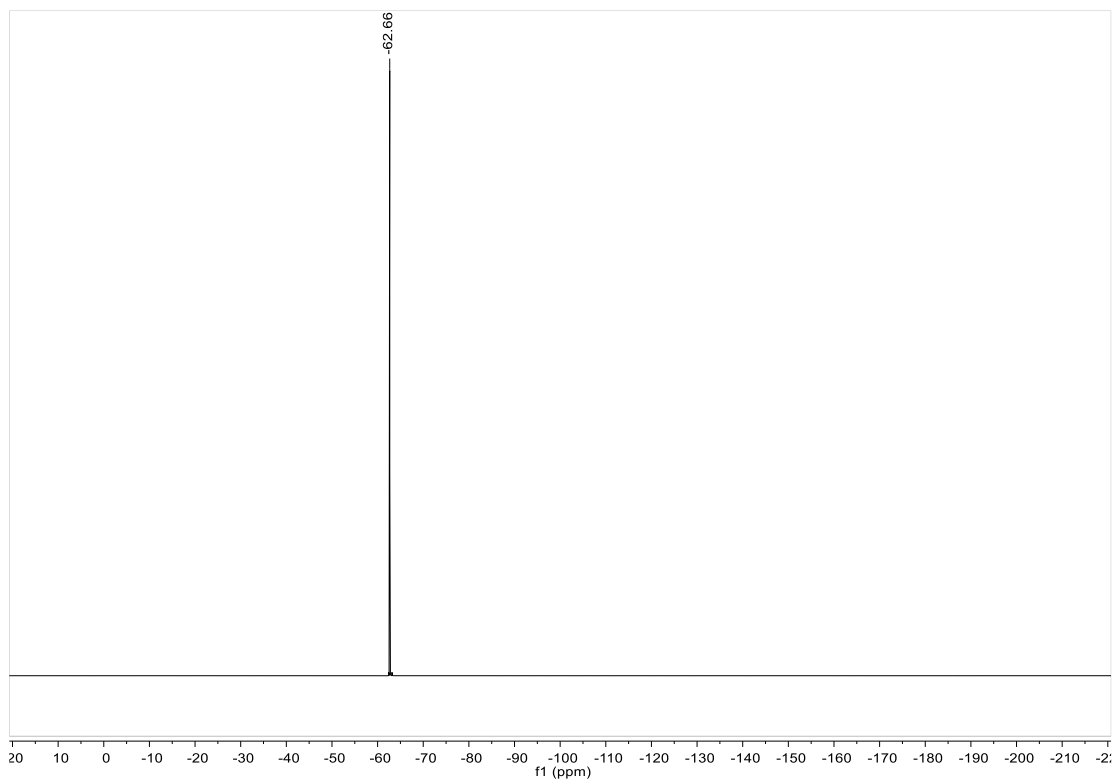

```

=====
Acq. Operator   : SYSTEM                      Seq. Line :    1
Acq. Instrument : 1260                       Location  :   63
Injection Date  : 6/16/2020 9:29:32 PM      Inj       :    1
                                           Inj Volume: 7.000 µl

Acq. Method     : E:\DATA\WRQ\WRQ-05-CF3-RAC\WRQ-05-CF3-RAC 2020-06-16 21-27-58\WRQ-4-IE-95-5
                  -DAD-1ML-30MIN.M
Last changed    : 6/16/2020 9:27:58 PM by SYSTEM
Analysis Method : E:\DATA\WRQ\WRQ-05-CF3-RAC\WRQ-05-CF3-RAC 2020-06-16 21-27-58\WRQ-4-IE-95-5
                  -DAD-1ML-30MIN.M (Sequence Method)
Last changed    : 7/20/2020 9:55:02 PM by SYSTEM
                  (modified after loading)
  
```

Additional Info : Peak(s) manually integrated

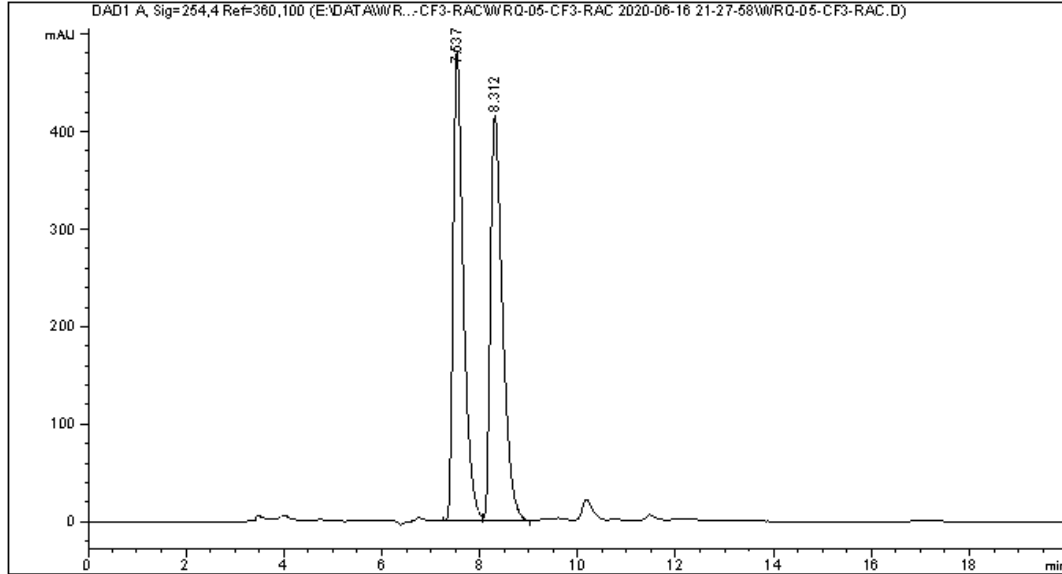

Area Percent Report

```

=====
Sorted By      :      Signal
Multiplier     :      1.0000
Dilution       :      1.0000
Do not use Multiplier & Dilution Factor with ISTDs
  
```

Signal 1: DAD1 A, Sig=254,4 Ref=360,100

| Peak # | RetTime [min] | Type | Width [min] | Area [mAU*s] | Height [mAU] | Area %  |
|--------|---------------|------|-------------|--------------|--------------|---------|
| 1      | 7.537         | BV   | 0.2208      | 7093.07568   | 481.72916    | 50.0025 |
| 2      | 8.312         | VB   | 0.2573      | 7092.35742   | 415.08438    | 49.9975 |

Totals : 1.41854e4 896.81354

```

=====
Acq. Operator   : SYSTEM                      Seq. Line :    1
Acq. Instrument : 1260                       Location  :   64
Injection Date  : 6/16/2020 8:51:23 PM      Inj       :    1
                                           Inj Volume: 10.000 µl

Acq. Method     : E:\DATA\WRQ\WRQ--05-CF3-S\WRQ-05-CF3-S 2020-06-16 20-49-51\WRQ-4-IE-95-5-
                  DAD-1ML-30MIN.M
Last changed    : 6/16/2020 8:49:51 PM by SYSTEM
Analysis Method : E:\DATA\WRQ\WRQ--05-CF3-S\WRQ-05-CF3-S 2020-06-16 20-49-51\WRQ-4-IE-95-5-
                  DAD-1ML-30MIN.M (Sequence Method)
Last changed    : 7/20/2020 9:54:07 PM by SYSTEM
                  (modified after loading)
  
```

Additional Info : Peak(s) manually integrated

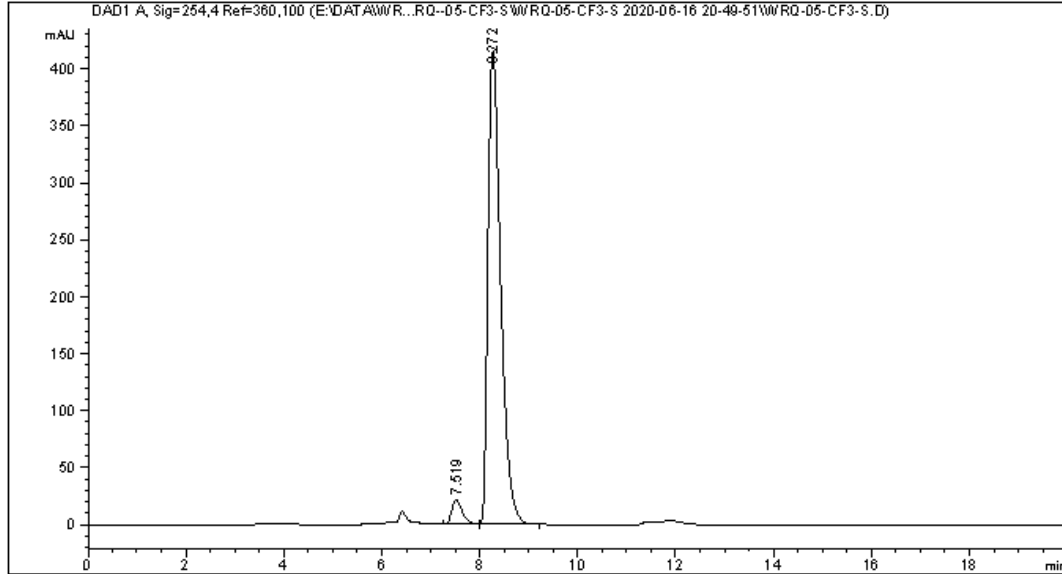

Area Percent Report

```

Sorted By      :      Signal
Multiplier     :      1.0000
Dilution       :      1.0000
Do not use Multiplier & Dilution Factor with ISTDs
  
```

Signal 1: DAD1 A, Sig=254,4 Ref=360,100

| Peak # | RetTime [min] | Type | Width [min] | Area [mAU*s] | Height [mAU] | Area %  |
|--------|---------------|------|-------------|--------------|--------------|---------|
| 1      | 7.519         | BB   | 0.2238      | 320.80942    | 21.65504     | 4.1342  |
| 2      | 8.272         | BB   | 0.2762      | 7439.04053   | 414.89069    | 95.8658 |

Totals : 7759.84995 436.54573

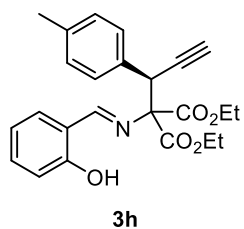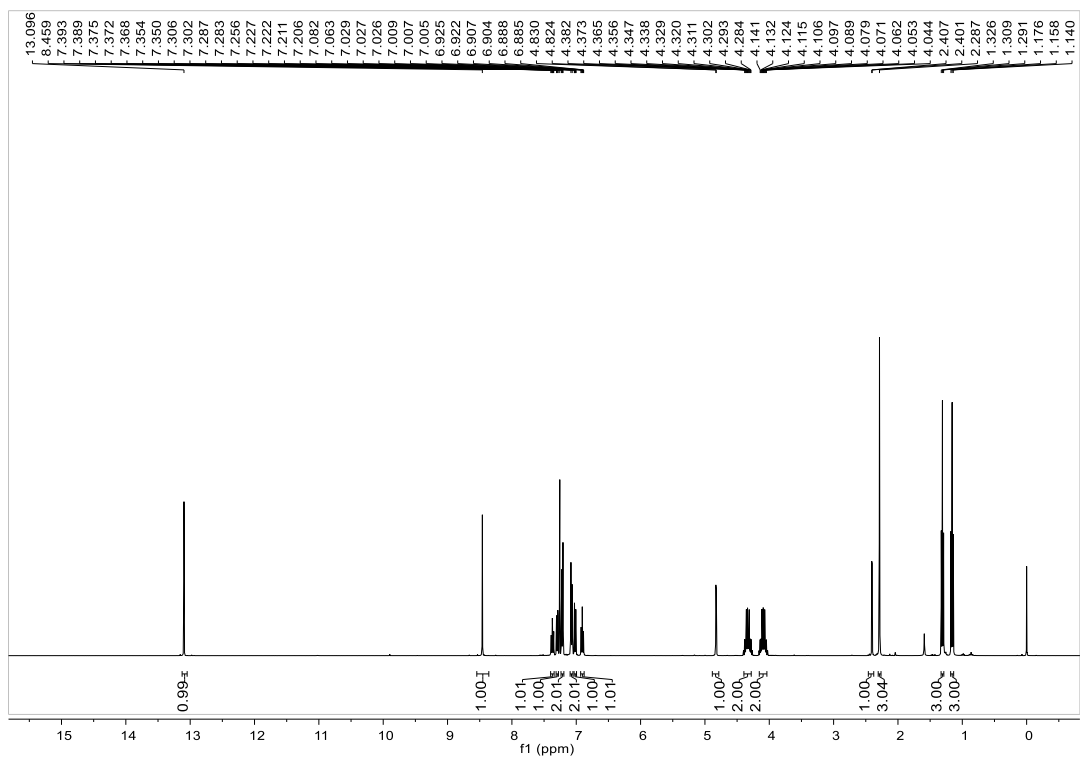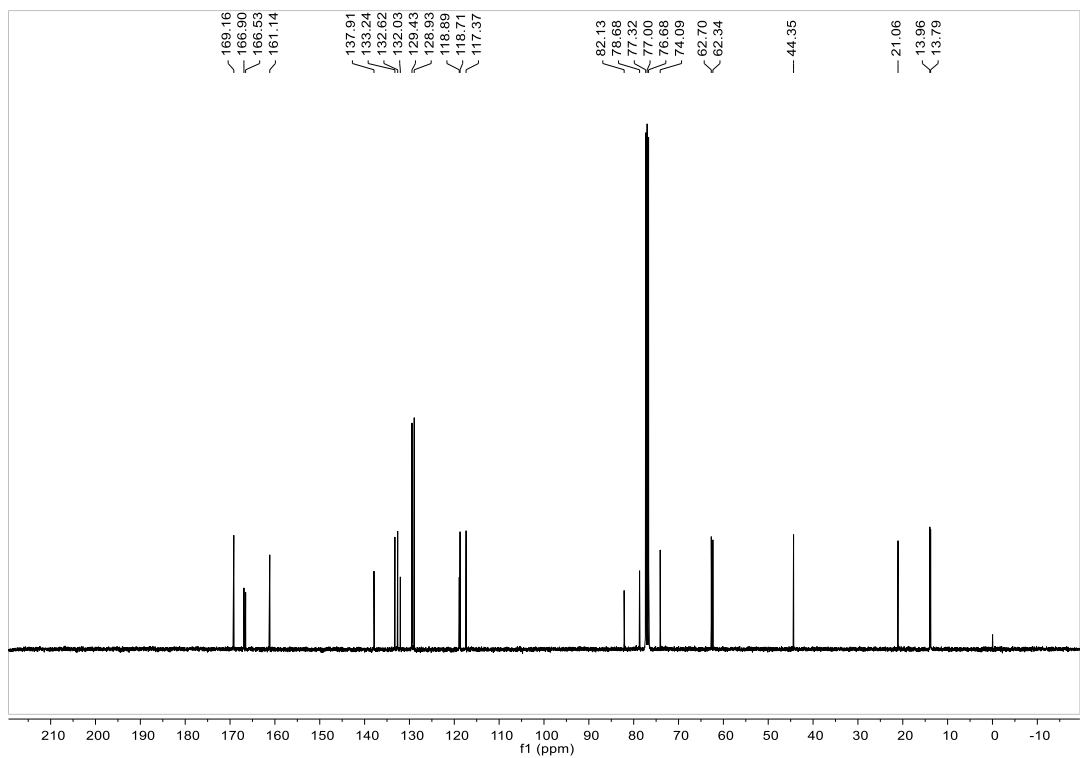

Data File E:\DATA\WRQ\WRQ-05--05\WRQ-05-05-06-95-5 2019-12-18 01-01-11\WRQ-05--051.D  
Sample Name: WRQ-05--06-Me

```
=====
Acq. Operator   : SYSTEM                      Seq. Line :    2
Acq. Instrument : 1260                      Location  :   52
Injection Date  : 12/18/2019 2:04:08 AM      Inj       :    1
                                           Inj Volume: 10.000 µl
Acq. Method     : E:\DATA\WRQ\WRQ-05--05\WRQ-05-05-06-95-5 2019-12-18 01-01-11\WRQ-2-95-5-DAD
                  -1ML-60MIN.M
Last changed    : 12/18/2019 1:01:11 AM by SYSTEM
Analysis Method : E:\DATA\WRQ\WRQ-05--05\WRQ-05-05-06-95-5 2019-12-18 01-01-11\WRQ-2-95-5-DAD
                  -1ML-60MIN.M (Sequence Method)
Last changed    : 7/21/2020 8:15:01 PM by SYSTEM
                  (modified after loading)
Additional Info : Peak(s) manually integrated
                *DAD1, Sig=262,4 Ref=355,90, EXT of WRQ-05--051.D
=====
```

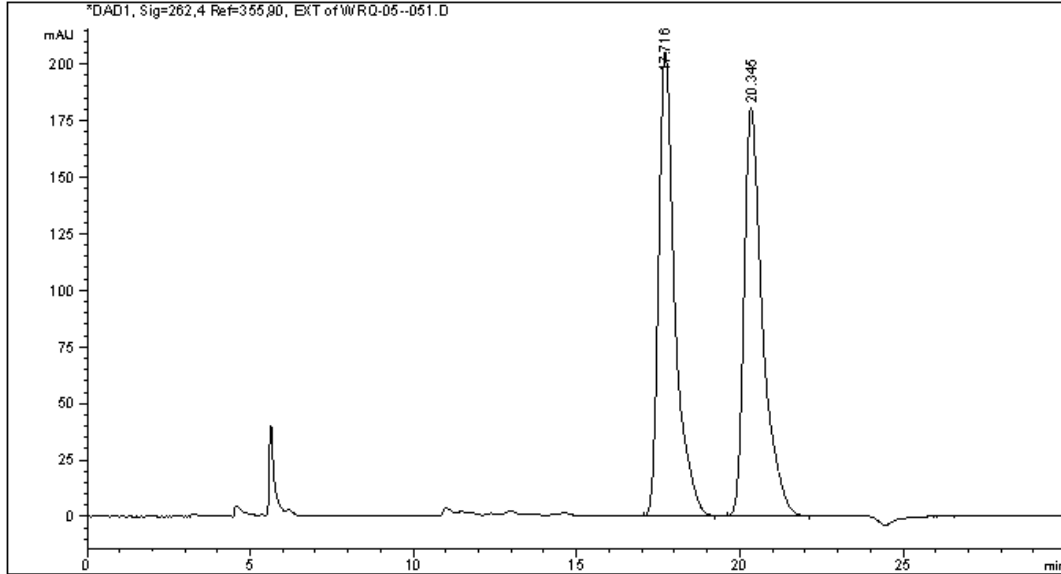

=====  
Area Percent Report  
=====

```
Sorted By      : Signal
Multiplier     : 1.0000
Dilution       : 1.0000
Do not use Multiplier & Dilution Factor with ISTDs
```

Signal 1: DAD1, Sig=262,4 Ref=355,90, EXT  
Signal has been modified after loading from rawdata file!

| Peak # | RetTime [min] | Type | Width [min] | Area [mAU*s] | Height [mAU] | Area %  |
|--------|---------------|------|-------------|--------------|--------------|---------|
| 1      | 17.716        | BB   | 0.5042      | 7095.61768   | 205.33069    | 49.9542 |
| 2      | 20.345        | BB   | 0.5712      | 7108.61523   | 180.61755    | 50.0458 |

Totals : 1.42042e4 385.94824



```

=====
Acq. Operator   : SYSTEM                      Seq. Line :    2
Acq. Instrument : 1260                      Location  :   54
Injection Date  : 12/19/2019 11:36:27 PM    Inj       :    1
                                           Inj Volume: 5.000 µl

Acq. Method     : E:\DATA\WRQ\WRQ-05--07\WRQ-05-07-8-9-10 2019-12-19 23-03-29\WRQ-2-95-5-DAD-
                  LML-30MIN.M
Last changed    : 12/19/2019 11:03:29 PM by SYSTEM
Analysis Method : E:\DATA\WRQ\WRQ-05--07\WRQ-05-07-8-9-10 2019-12-19 23-03-29\WRQ-2-95-5-DAD-
                  LML-30MIN.M (Sequence Method)
Last changed    : 7/21/2020 8:16:33 PM by SYSTEM
                  (modified after loading)
Additional Info  : Peak(s) manually integrated
  
```

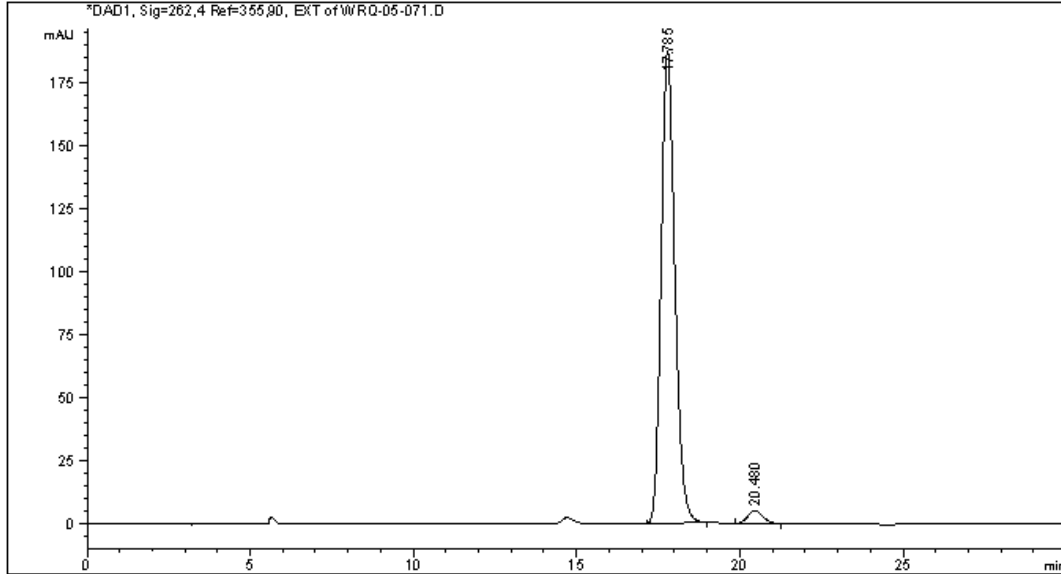

=====  
 Area Percent Report  
 =====

```

Sorted By       :      Signal
Multiplier      :      1.0000
Dilution        :      1.0000
Do not use Multiplier & Dilution Factor with ISTDs
  
```

Signal 1: DAD1, Sig=262,4 Ref=355,90, EXT  
 Signal has been modified after loading from rawdata file!

| Peak # | RetTime [min] | Type | Width [min] | Area [mAU*s] | Height [mAU] | Area %  |
|--------|---------------|------|-------------|--------------|--------------|---------|
| 1      | 17.785        | BB   | 0.4526      | 5495.39795   | 187.11365    | 97.0338 |
| 2      | 20.480        | BB   | 0.3829      | 167.98982    | 5.18680      | 2.9662  |

Totals :                    5663.38777   192.30045

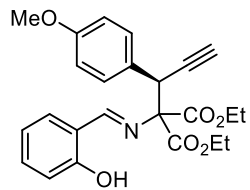

**3i**

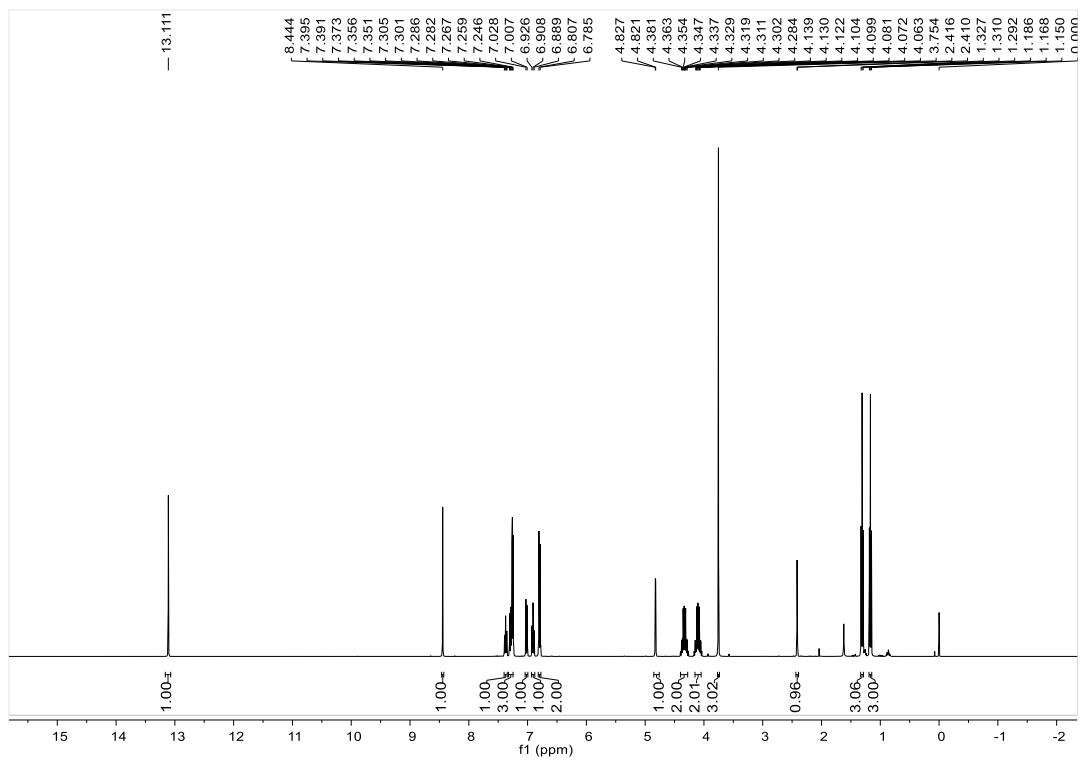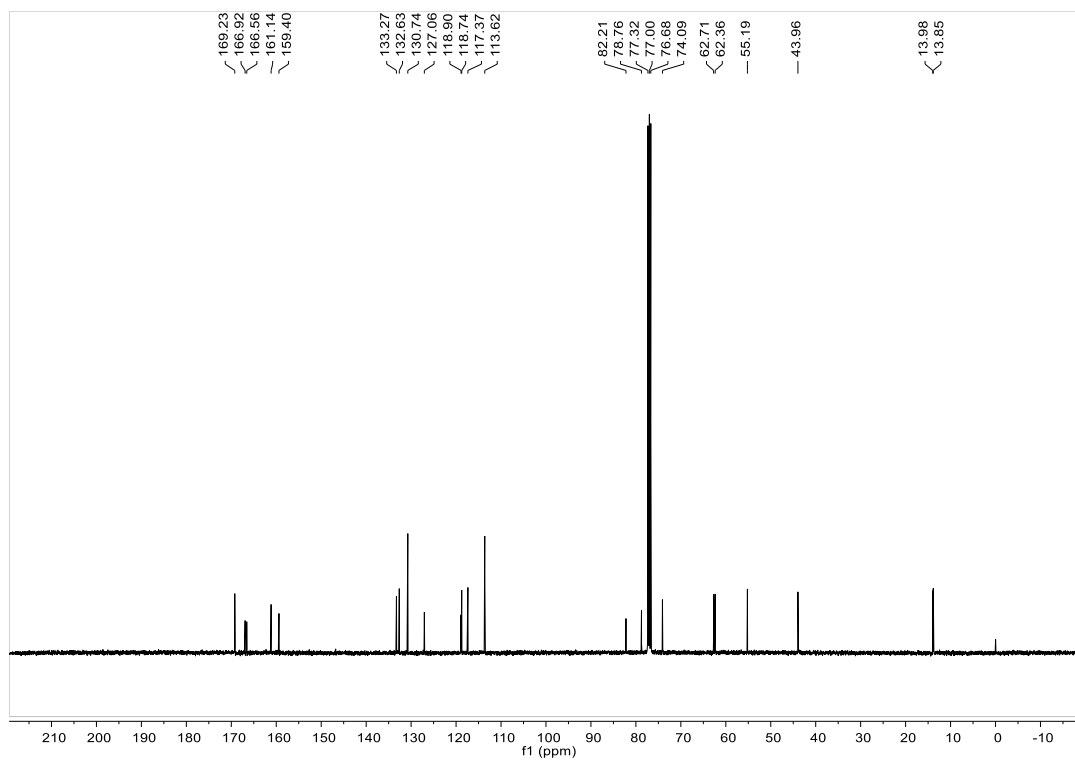

```

=====
Acq. Operator   : SYSTEM                      Seq. Line :    1
Acq. Instrument : 1260                       Location  :   51
Injection Date  : 12/1/2019 12:48:18 AM      Inj       :    1
                                           Inj Volume: 10.000 µl

Acq. Method    : E:\DATA\WRQ\WRQ-04-139\WRQ-04-139-AD-98 2019-12-01 00-46-53\WRQ-2-98-2-DAD-
                LML.M
Last changed   : 12/1/2019 12:46:53 AM by SYSTEM
Analysis Method : E:\DATA\WRQ\WRQ-04-139\WRQ-04-139-AD-98 2019-12-01 00-46-53\WRQ-2-98-2-DAD-
                LML.M (Sequence Method)
Last changed   : 7/20/2020 10:47:02 PM by SYSTEM
                (modified after loading)
Additional Info : Peak(s) manually integrated
  
```

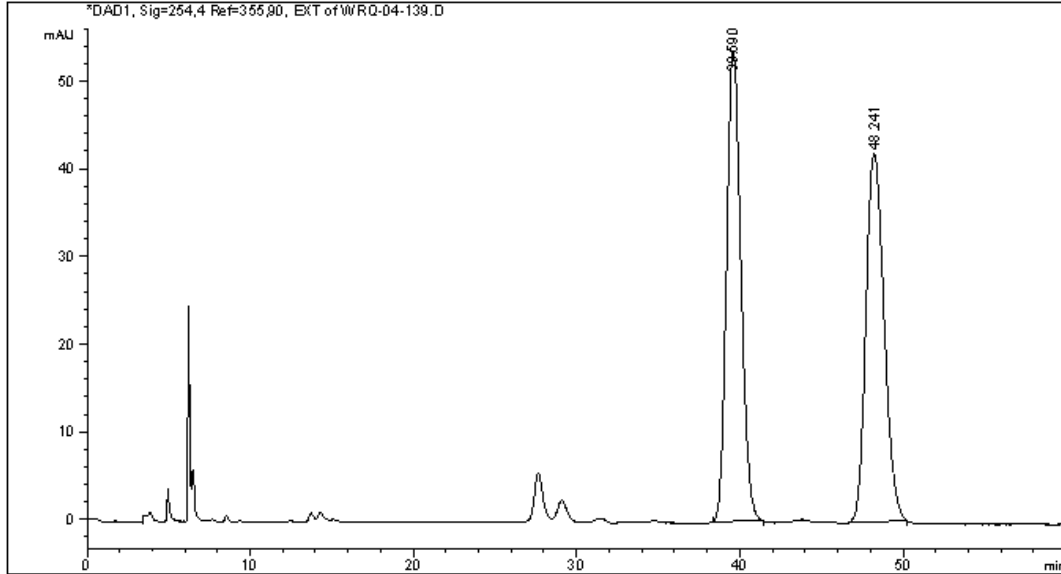

=====  
 Area Percent Report  
 =====

```

Sorted By      :      Signal
Multiplier     :      1.0000
Dilution      :      1.0000
Do not use Multiplier & Dilution Factor with ISTDs
  
```

Signal 1: DAD1, Sig=254,4 Ref=355,90, EXT  
 Signal has been modified after loading from rawdata file!

| Peak # | RetTime [min] | Type | Width [min] | Area [mAU*s] | Height [mAU] | Area %  |
|--------|---------------|------|-------------|--------------|--------------|---------|
| 1      | 39.590        | BB   | 0.7156      | 3262.94092   | 53.64431     | 50.2936 |
| 2      | 48.241        | BB   | 0.9024      | 3224.84229   | 41.97158     | 49.7064 |

Totals :                    6487.78320    95.61590

Data File E:\DATA\LYN\WCS-2-35 2019-12-05 22-40-08\LYN-4-193.D  
 Sample Name: WRQ-04-145

```

=====
Acq. Operator   : SYSTEM                      Seq. Line :    4
Acq. Instrument : 1260                      Location  :   53
Injection Date  : 12/6/2019 12:15:38 AM      Inj       :    1
                                           Inj Volume: 5.000 µl

Acq. Method     : E:\DATA\LYN\WCS-2-35 2019-12-05 22-40-08\WRQ-2-98-2--70min-DAD.M
Last changed    : 12/5/2019 10:40:08 PM by SYSTEM
Analysis Method : E:\DATA\LYN\WCS-2-35 2019-12-05 22-40-08\WRQ-2-98-2--70min-DAD.M (Sequence
Method)
Last changed    : 7/20/2020 10:21:54 PM by SYSTEM
                 (modified after loading)
Additional Info : Peak(s) manually integrated
  
```

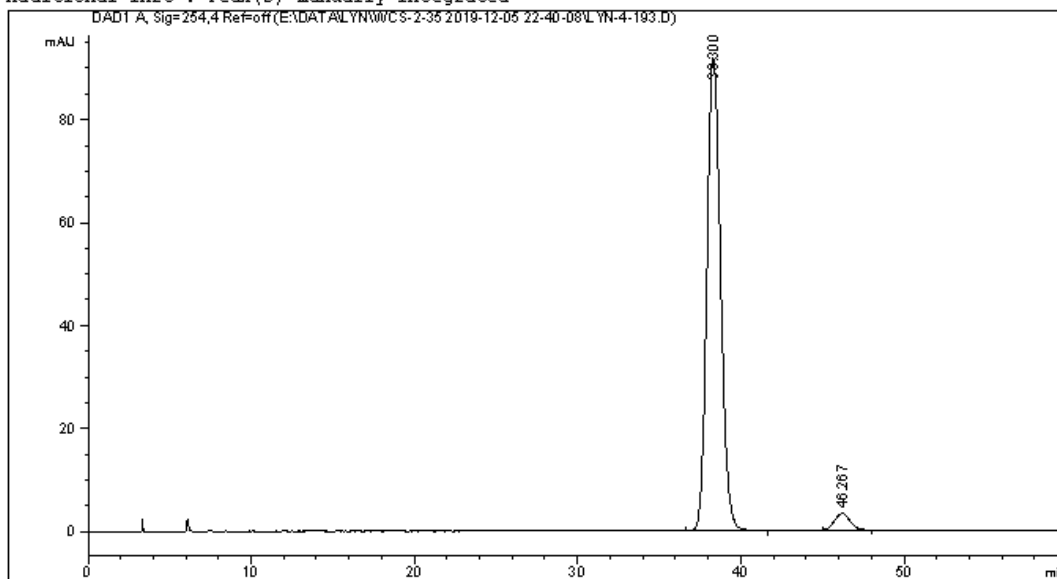

=====  
 Area Percent Report  
 =====

```

Sorted By      :      Signal
Multiplier     :      1.0000
Dilution      :      1.0000
Do not use Multiplier & Dilution Factor with ISTDs
  
```

Signal 1: DAD1 A, Sig=254,4 Ref=off

| Peak # | RetTime [min] | Type | Width [min] | Area [mAU*s] | Height [mAU] | Area %  |
|--------|---------------|------|-------------|--------------|--------------|---------|
| 1      | 38.300        | MM R | 0.9701      | 5340.50244   | 91.74818     | 96.0108 |
| 2      | 46.267        | MM R | 1.0928      | 221.89731    | 3.38426      | 3.9892  |

Totals :                    5562.39975    95.13244

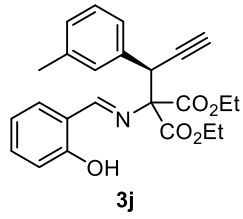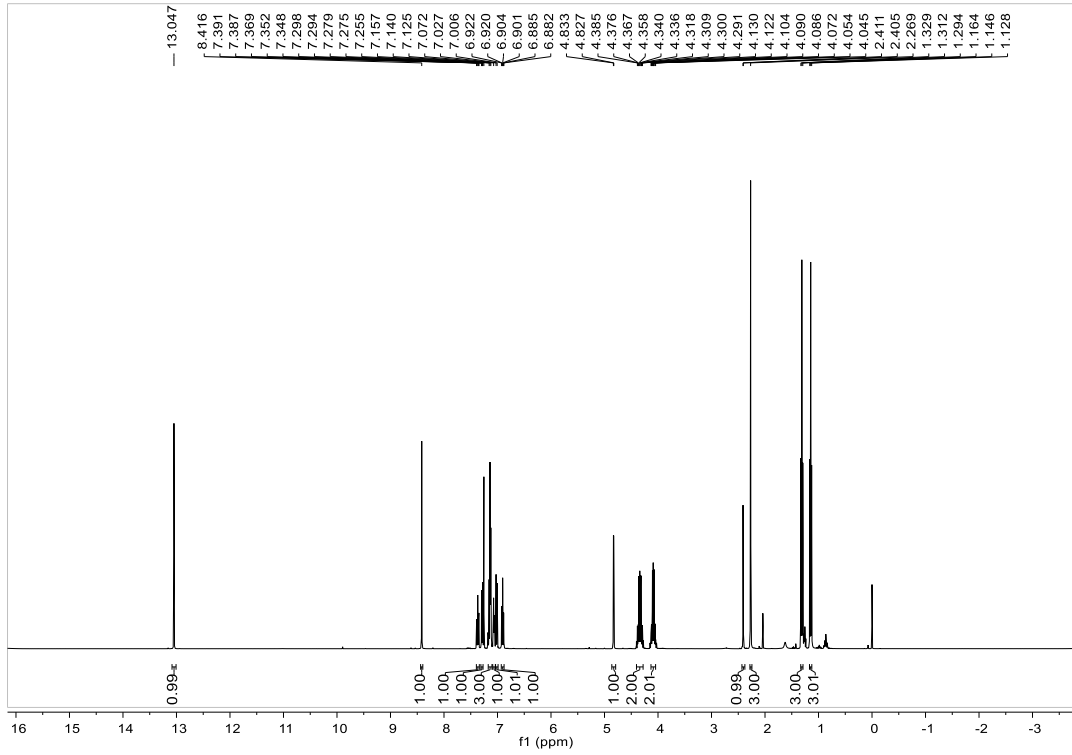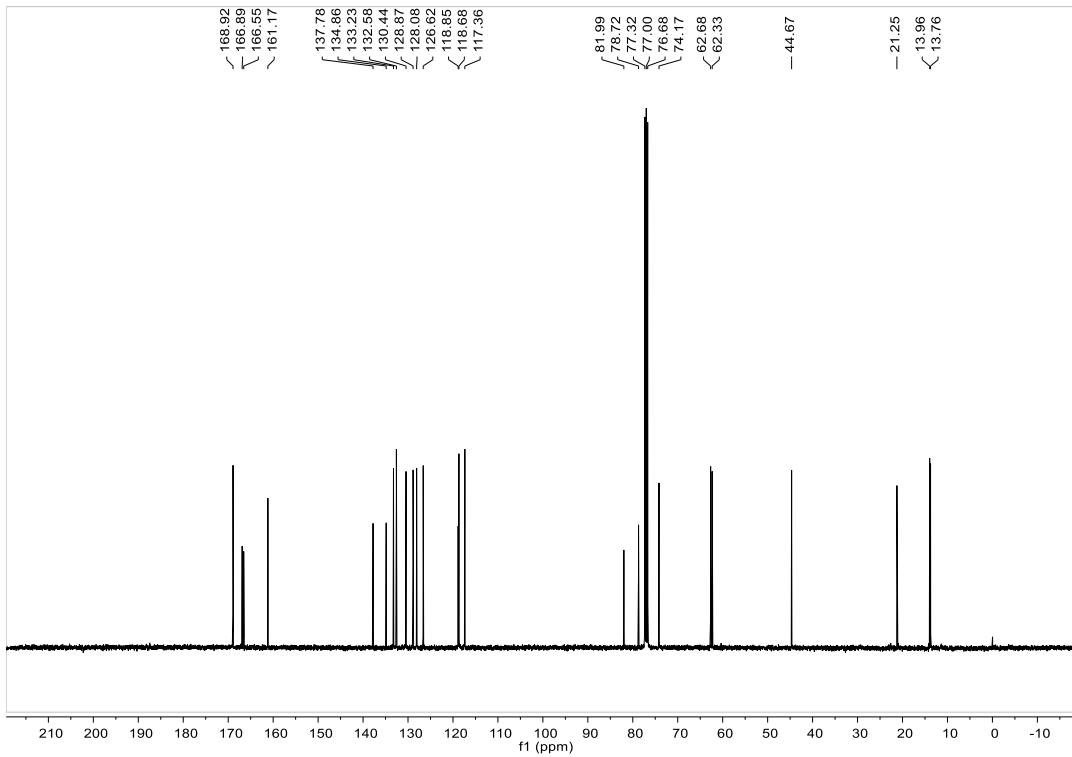

Data File E:\DATA\WRQ\WRQ-05--07\WRQ-05-07-8-9-10 2019-12-19 23-03-29\WRQ-05-074.D  
 Sample Name: WRQ-05-10

```

=====
Acq. Operator   : SYSTEM                      Seq. Line :    5
Acq. Instrument : 1260                        Location  :   56
Injection Date  : 12/20/2019 1:41:06 AM      Inj       :    1
                                           Inj Volume: 10.000 µl

Acq. Method    : E:\DATA\WRQ\WRQ-05--07\WRQ-05-07-8-9-10 2019-12-19 23-03-29\WRQ-2-95-5-DAD-
                LML-60MIN.M
Last changed   : 12/19/2019 11:03:29 PM by SYSTEM
Analysis Method : E:\DATA\WRQ\WRQ-05--07\WRQ-05-07-8-9-10 2019-12-19 23-03-29\WRQ-2-95-5-DAD-
                LML-60MIN.M (Sequence Method)
Last changed   : 7/21/2020 8:21:55 PM by SYSTEM
                (modified after loading)
Additional Info : Peak(s) manually integrated
  
```

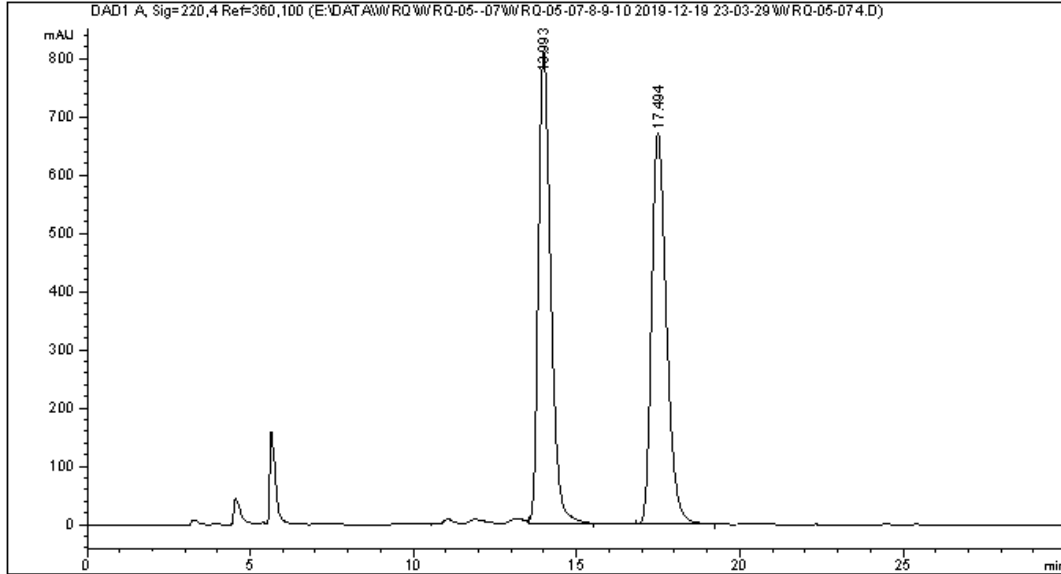

=====  
 Area Percent Report  
 =====

```

Sorted By      :      Signal
Multiplier     :      1.0000
Dilution      :      1.0000
Do not use Multiplier & Dilution Factor with ISTDs
  
```

Signal 1: DAD1 A, Sig=220,4 Ref=360,100

| Peak # | RetTime [min] | Type | Width [min] | Area [mAU*s] | Height [mAU] | Area %  |
|--------|---------------|------|-------------|--------------|--------------|---------|
| 1      | 13.993        | FM R | 0.4369      | 2.12496e4    | 810.65375    | 50.1537 |
| 2      | 17.494        | BB   | 0.4772      | 2.11193e4    | 671.04120    | 49.8463 |

Totals :                    4.23688e4  1481.69495

```

=====
Acq. Operator   : SYSTEM                      Seq. Line :    2
Acq. Instrument : 1260                       Location  :   52
Injection Date  : 12/25/2019 4:16:51 PM      Inj       :    1
                                           Inj Volume: 7.000 µl

Acq. Method     : E:\DATA\WRQ\WRQ-05-12-13\WRQ-05-12-13 2019-12-25 15-43-54\WRQ-2-95-5-DAD-
                  LML-30MIN.M
Last changed    : 12/25/2019 3:43:54 PM by SYSTEM
Analysis Method : E:\DATA\WRQ\WRQ-05-12-13\WRQ-05-12-13 2019-12-25 15-43-54\WRQ-2-95-5-DAD-
                  LML-30MIN.M (Sequence Method)
Last changed    : 7/21/2020 8:23:13 PM by SYSTEM
                  (modified after loading)
Additional Info : Peak(s) manually integrated
  
```

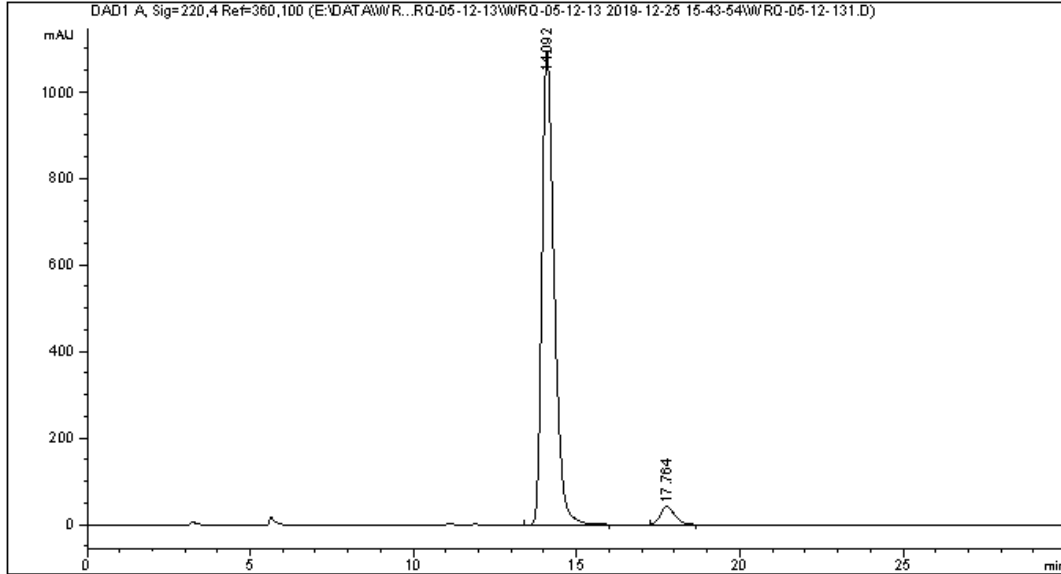

=====  
 Area Percent Report  
 =====

```

Sorted By      :      Signal
Multiplier     :      1.0000
Dilution       :      1.0000
Do not use Multiplier & Dilution Factor with ISTDs
  
```

Signal 1: DAD1 A, Sig=220,4 Ref=360,100

| Peak # | RetTime [min] | Type | Width [min] | Area [mAU*s] | Height [mAU] | Area %  |
|--------|---------------|------|-------------|--------------|--------------|---------|
| 1      | 14.092        | MM R | 0.4321      | 2.83623e4    | 1093.86584   | 95.7648 |
| 2      | 17.764        | MM R | 0.5092      | 1254.31787   | 41.05161     | 4.2352  |

Totals :                    2.96166e4 1134.91745

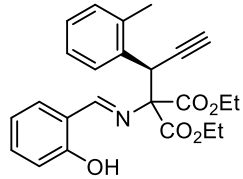

3k

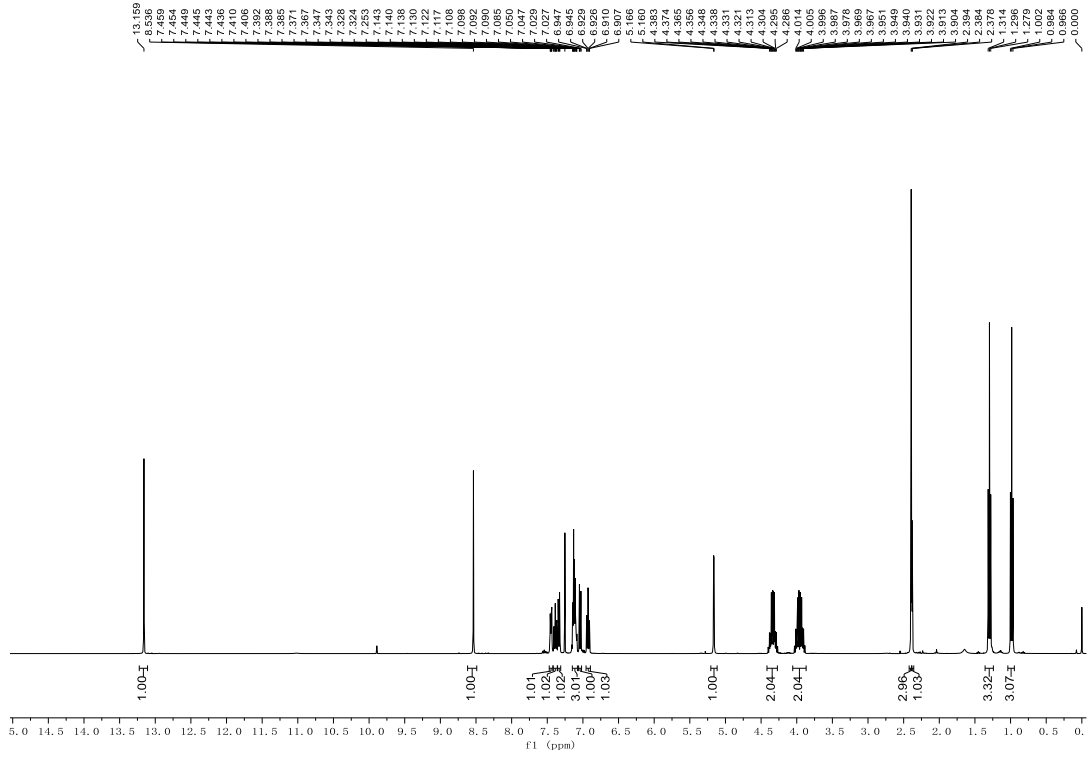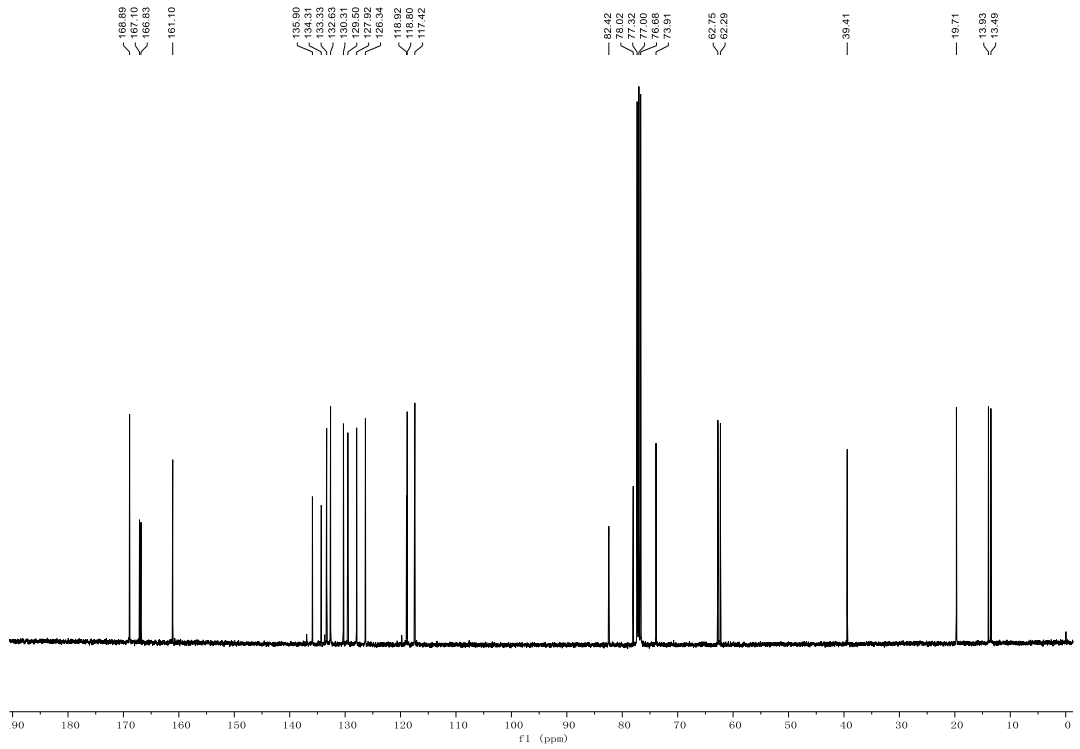



```

=====
Acq. Operator   : SYSTEM                      Seq. Line :    1
Acq. Instrument : 1260                        Location  :   51
Injection Date  : 12/28/2019 11:11:03 PM      Inj       :    1
                                           Inj Volume: 7.000 µl

Acq. Method     : E:\DATA\WRQ\WRQ-05-17-18\WRQ-05-17-18 2019-12-28 23-09-37\WRQ-2-95-5-DAD-
                  LML-30MIN.M
Last changed    : 12/28/2019 11:09:37 PM by SYSTEM
Analysis Method : E:\DATA\WRQ\WRQ-05-17-18\WRQ-05-17-18 2019-12-28 23-09-37\WRQ-2-95-5-DAD-
                  LML-30MIN.M (Sequence Method)
Last changed    : 6/27/2021 10:28:38 PM by SYSTEM
                  (modified after loading)
Additional Info : Peak(s) manually integrated
  
```

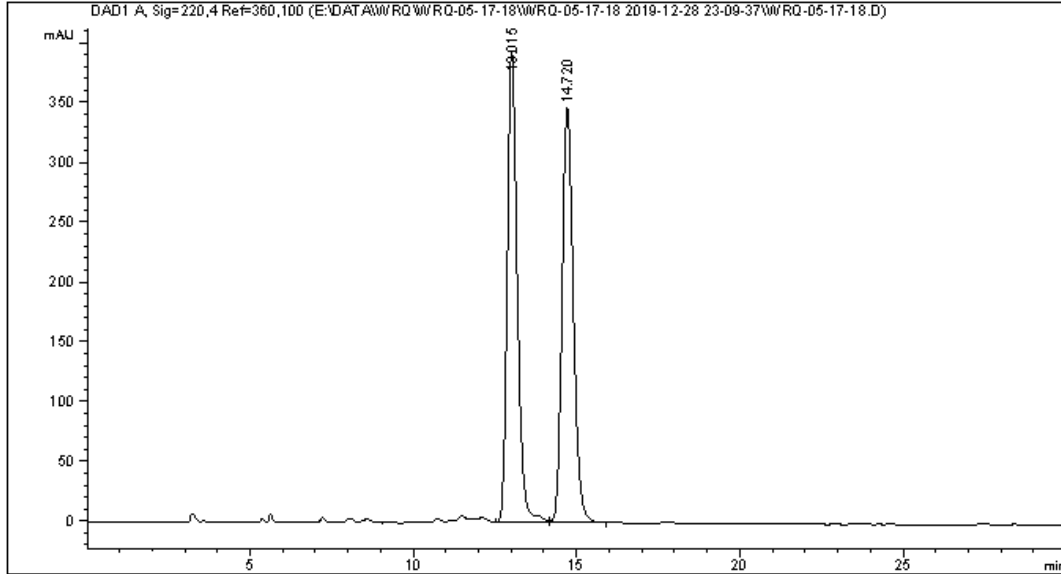

=====  
 Area Percent Report  
 =====

```

Sorted By       :      Signal
Multiplier      :      1.0000
Dilution       :      1.0000
Do not use Multiplier & Dilution Factor with ISTDs
  
```

Signal 1: DAD1 A, Sig=220,4 Ref=360,100

| Peak # | RetTime [min] | Type | Width [min] | Area [mAU*s] | Height [mAU] | Area %  |
|--------|---------------|------|-------------|--------------|--------------|---------|
| 1      | 13.015        | BV   | 0.3285      | 8453.36914   | 393.68243    | 50.3530 |
| 2      | 14.720        | VB   | 0.3734      | 8334.84082   | 346.79016    | 49.6470 |

Totals :                    1.67882e4    740.47260

```

=====
Acq. Operator   : SYSTEM                      Seq. Line :    3
Acq. Instrument : 1260                        Location  :   53
Injection Date  : 12/29/2019 12:14:03 AM      Inj       :    1
                                           Inj Volume: 7.000 µl

Acq. Method    : E:\DATA\WRQ\WRQ-05-17-18\WRQ-05-17-18 2019-12-28 23-09-37\WRQ-2-95-5-DAD-
                LML-30MIN.M
Last changed   : 12/28/2019 11:09:37 PM by SYSTEM
Analysis Method : E:\DATA\WRQ\WRQ-05-17-18\WRQ-05-17-18 2019-12-28 23-09-37\WRQ-2-95-5-DAD-
                LML-30MIN.M (Sequence Method)
Last changed   : 6/27/2021 10:28:38 PM by SYSTEM
                (modified after loading)
  
```

Additional Info : Peak(s) manually integrated

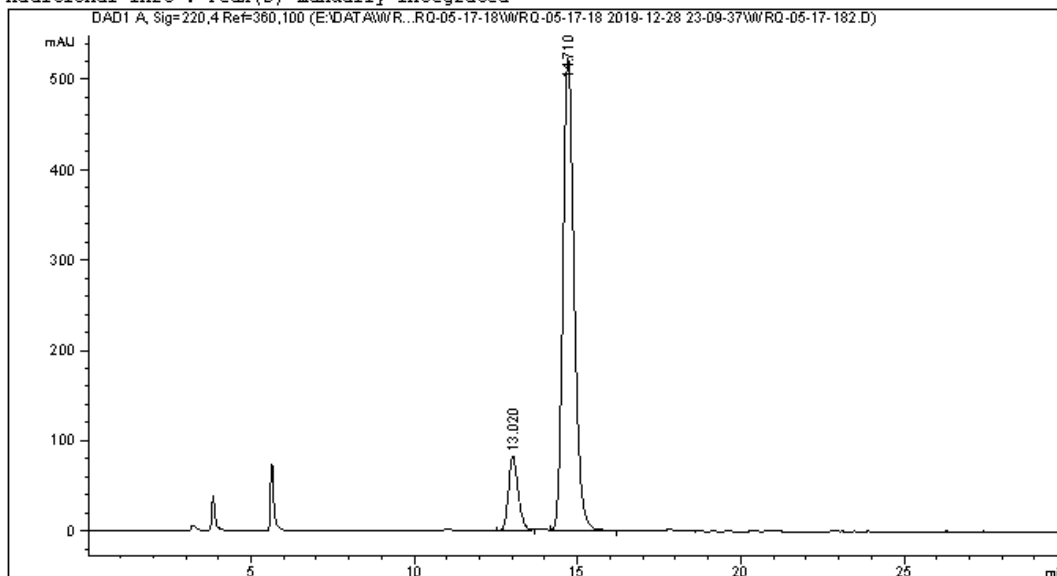

=====  
 Area Percent Report  
 =====

```

Sorted By      :      Signal
Multiplier     :      1.0000
Dilution      :      1.0000
Do not use Multiplier & Dilution Factor with ISTDs
  
```

Signal 1: DAD1 A, Sig=220,4 Ref=360,100

| Peak # | RetTime [min] | Type | Width [min] | Area [mAU*s] | Height [mAU] | Area %  |
|--------|---------------|------|-------------|--------------|--------------|---------|
| 1      | 13.020        | BB   | 0.3092      | 1688.35095   | 82.01949     | 11.8889 |
| 2      | 14.710        | BB   | 0.3702      | 1.25127e4    | 522.84393    | 88.1111 |

Totals :                    1.42011e4    604.86343

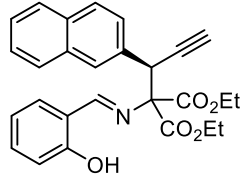

31

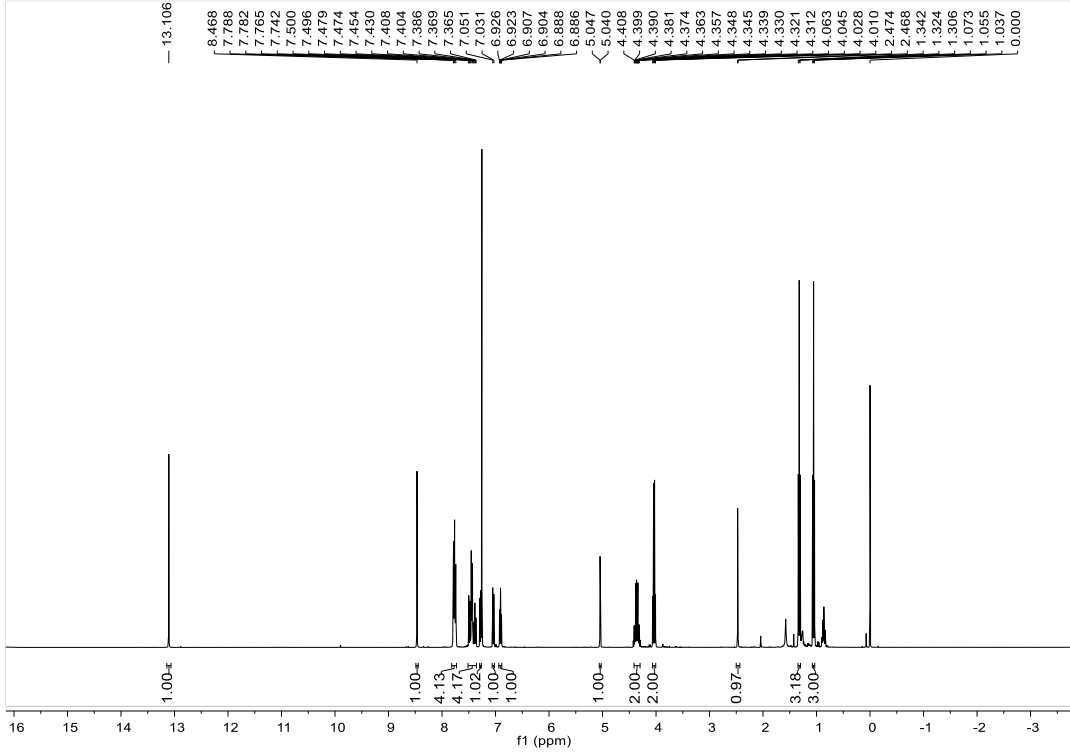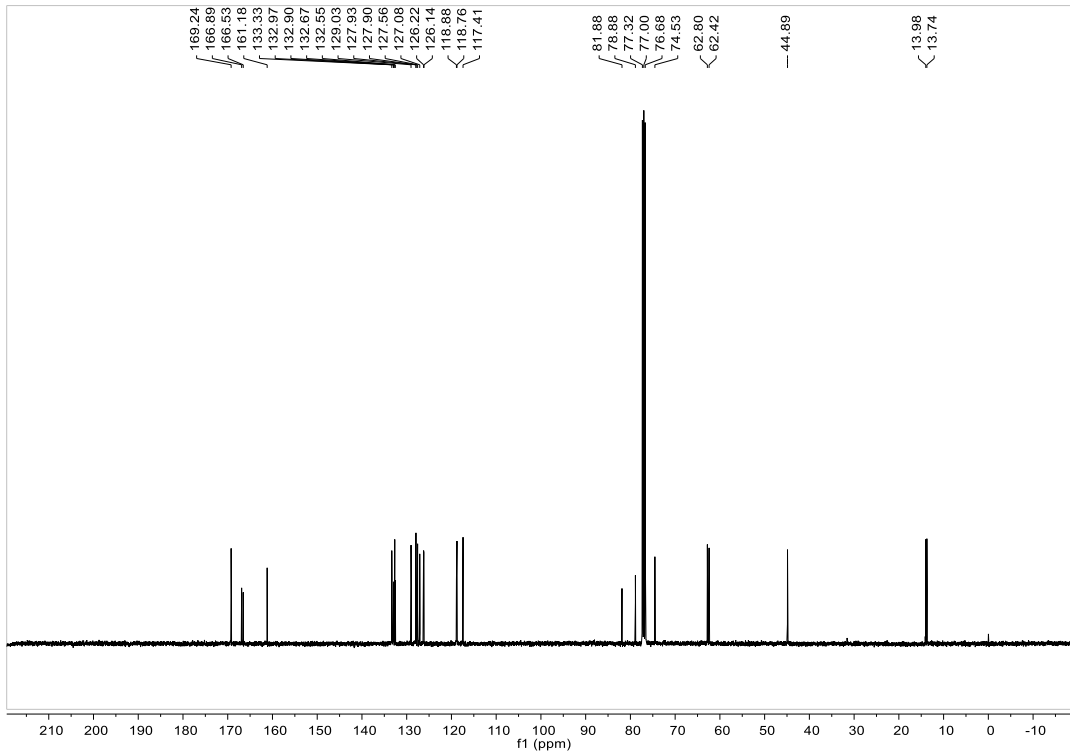

Data File E:\DATA\WRQ\WRQ-05-22\WRQ-05-22 2020-01-06 23-03-15\WRQ-05-22.D  
Sample Name: WRQ-05-22

```
=====
Acq. Operator   : SYSTEM                      Seq. Line :    1
Acq. Instrument : 1260                       Location  :   51
Injection Date  : 1/6/2020 11:04:48 PM      Inj       :    1
                                           Inj Volume: 7.000 µl
Acq. Method     : E:\DATA\WRQ\WRQ-05-22\WRQ-05-22 2020-01-06 23-03-15\WRQ-2-95-5-DAD-1ML-
                 30MIN.M
Last changed    : 1/6/2020 11:52:23 PM by SYSTEM
                 (modified after loading)
Analysis Method : E:\DATA\WRQ\WRQ-05-22\WRQ-05-22 2020-01-06 23-03-15\WRQ-2-95-5-DAD-1ML-
                 30MIN.M (Sequence Method)
Last changed    : 7/21/2020 8:59:28 PM by SYSTEM
                 (modified after loading)
Additional Info : Peak(s) manually integrated
=====
```

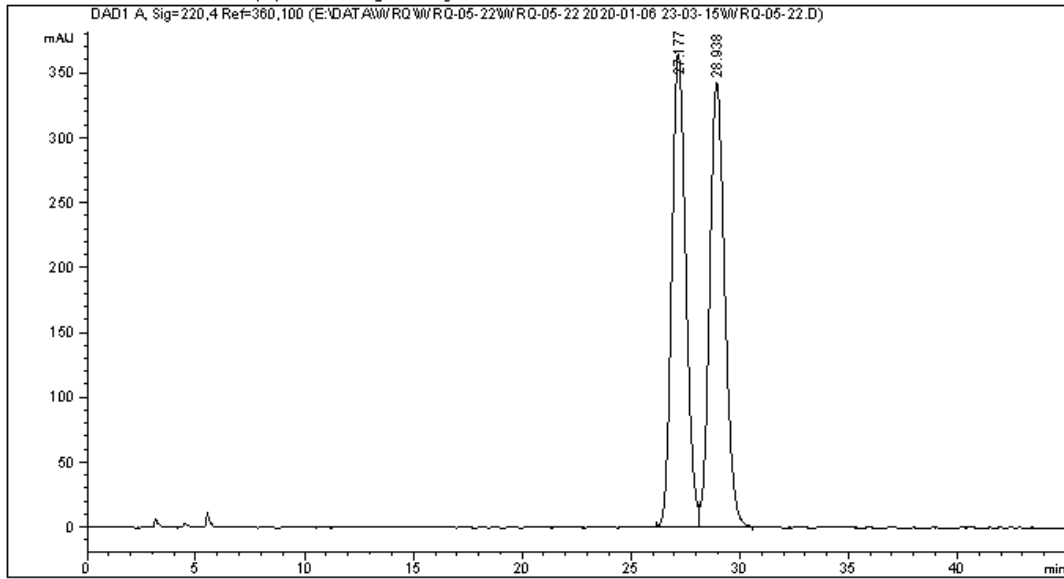

=====  
Area Percent Report  
=====

Sorted By : Signal  
Multiplier : 1.0000  
Dilution : 1.0000  
Do not use Multiplier & Dilution Factor with ISTDs

Signal 1: DAD1 A, Sig=220,4 Ref=360,100

| Peak # | RetTime [min] | Type | Width [min] | Area [mAU*s] | Height [mAU] | Area %  |
|--------|---------------|------|-------------|--------------|--------------|---------|
| 1      | 27.177        | BV   | 0.6639      | 1.62153e4    | 363.14661    | 49.7110 |
| 2      | 28.938        | VB   | 0.6908      | 1.64038e4    | 341.86246    | 50.2890 |

Totals : 3.26191e4 705.00906

1260 7/21/2020 8:59:31 PM SYSTEM

Page 1 of 2

Data File E:\DATA\WRQ\WRQ-05-22\WRQ-05-22 2020-01-06 23-03-15\WRQ-05-221.D  
 Sample Name: WRQ-05-23

```

=====
Acq. Operator   : SYSTEM                      Seq. Line :    2
Acq. Instrument : 1260                      Location  :   52
Injection Date  : 1/6/2020 11:54:17 PM      Inj       :    1
                                           Inj Volume: 7.000 µl

Acq. Method     : E:\DATA\WRQ\WRQ-05-22\WRQ-05-22 2020-01-06 23-03-15\WRQ-2-95-5-DAD-1ML-
                 30MIN.M
Last changed    : 1/6/2020 11:52:23 PM by SYSTEM
Analysis Method : E:\DATA\WRQ\WRQ-05-22\WRQ-05-22 2020-01-06 23-03-15\WRQ-2-95-5-DAD-1ML-
                 30MIN.M (Sequence Method)
Last changed    : 7/21/2020 8:58:57 PM by SYSTEM
                 (modified after loading)
Additional Info : Peak(s) manually integrated
  
```

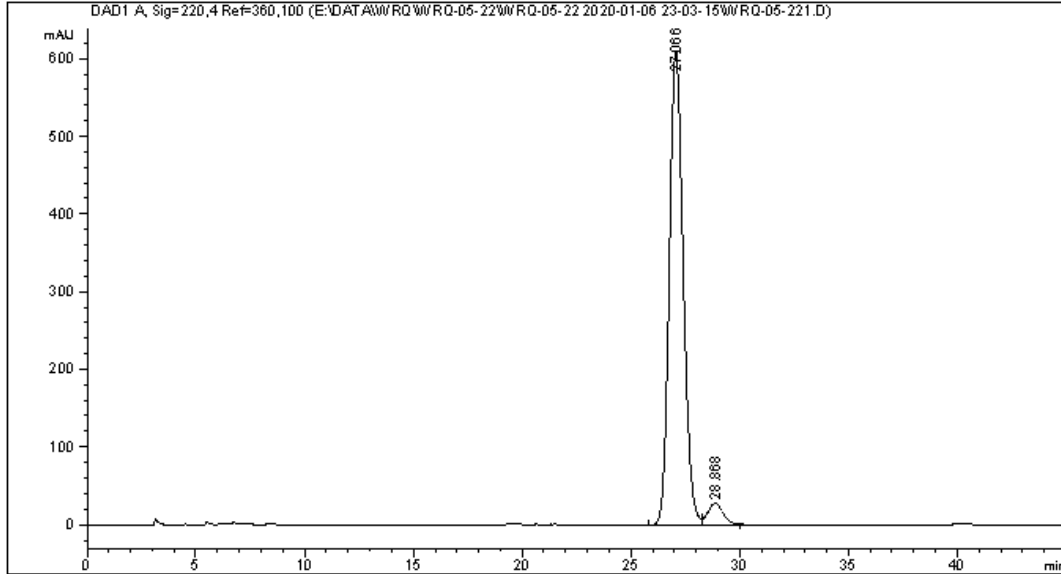

=====  
 Area Percent Report  
 =====

```

Sorted By      : Signal
Multiplier     : 1.0000
Dilution       : 1.0000
Do not use Multiplier & Dilution Factor with ISTDs
  
```

Signal 1: DAD1 A, Sig=220,4 Ref=360,100

| Peak # | RetTime [min] | Type | Width [min] | Area [mAU*s] | Height [mAU] | Area %  |
|--------|---------------|------|-------------|--------------|--------------|---------|
| 1      | 27.066        | MF R | 0.7405      | 2.70678e4    | 609.22577    | 95.4301 |
| 2      | 28.868        | FM R | 0.8004      | 1296.21387   | 26.99238     | 4.5699  |

Totals :                    2.83640e4   636.21815

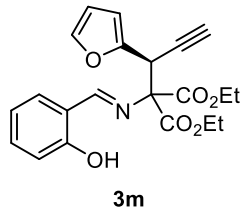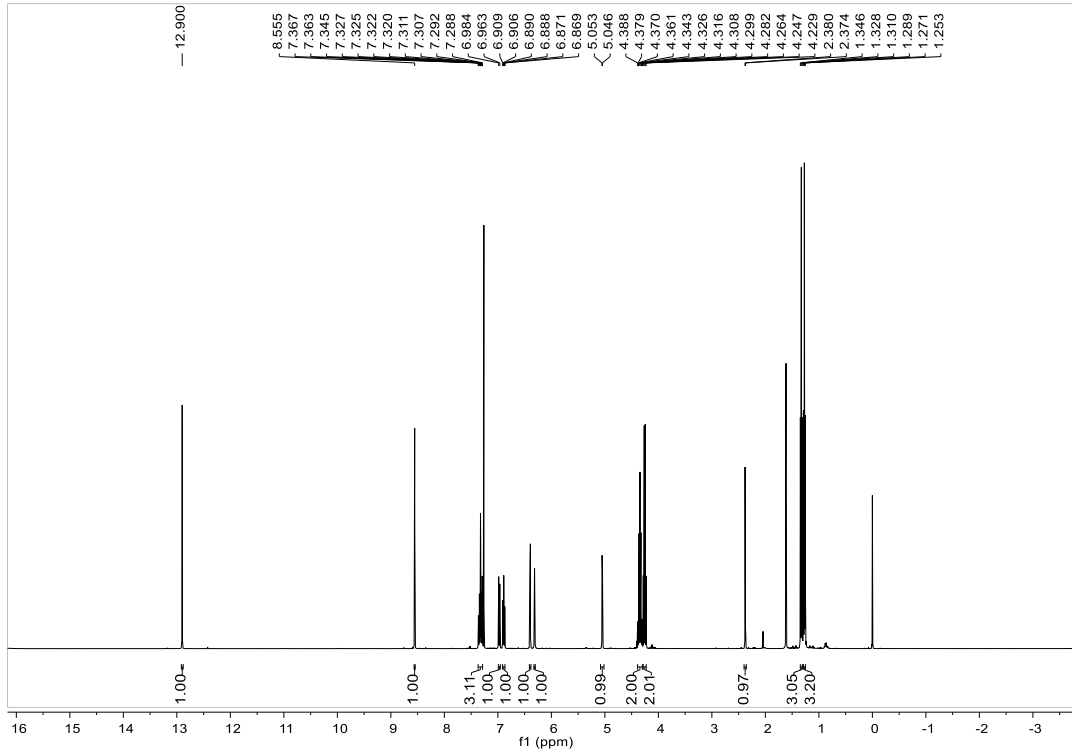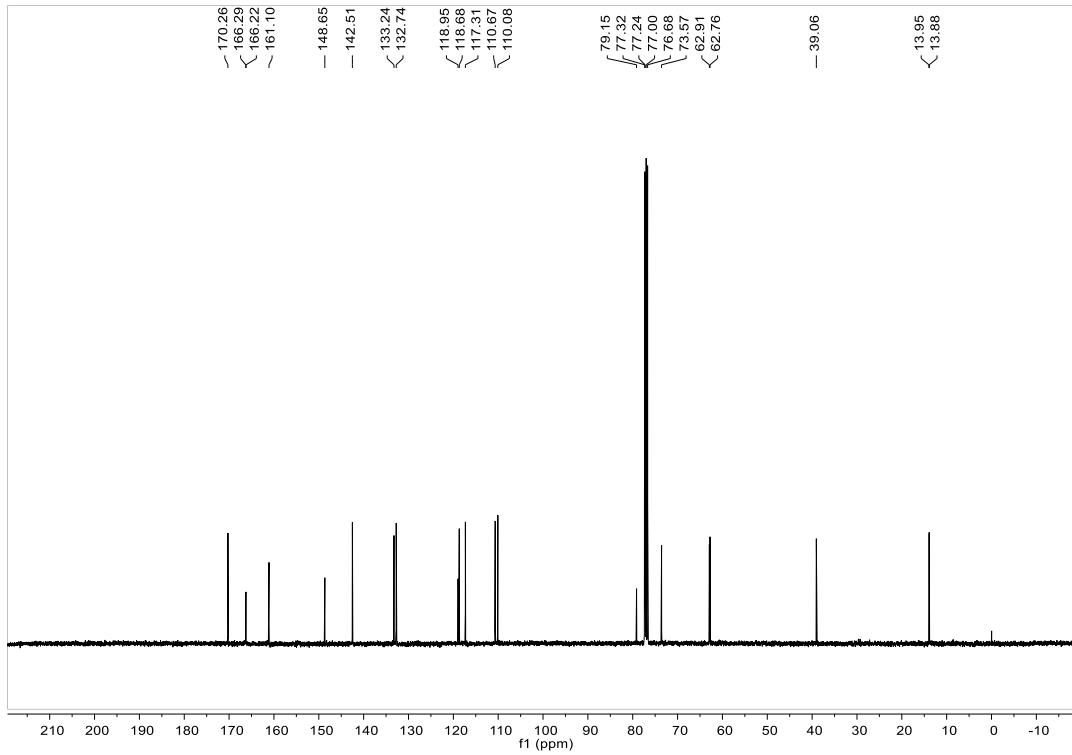

Data File E:\DATA\WR...n-rac\WRQ-05-furan-RAC-ie-95 2020-07-03 22-39-43\WRQ-05-furan-rac.D  
 Sample Name: WRQ-05-furan-rac

```

=====
Acq. Operator   : SYSTEM                      Seq. Line :    1
Acq. Instrument : 1260                       Location  :   63
Injection Date  : 7/3/2020 10:41:20 PM      Inj       :    1
                                           Inj Volume: 15.000 µl

Acq. Method     : E:\DATA\WRQ\WRQ-05-furan-rac\WRQ-05-furan-RAC-ie-95 2020-07-03 22-39-43\WRQ
                  -4-IE-95-5-DAD-1ML-30MIN.M
Last changed    : 7/3/2020 10:39:43 PM by SYSTEM
Analysis Method : E:\DATA\WRQ\WRQ-05-furan-rac\WRQ-05-furan-RAC-ie-95 2020-07-03 22-39-43\WRQ
                  -4-IE-95-5-DAD-1ML-30MIN.M (Sequence Method)
Last changed    : 7/20/2020 8:19:08 PM by SYSTEM
                  (modified after loading)
Additional Info : Peak(s) manually integrated
  
```

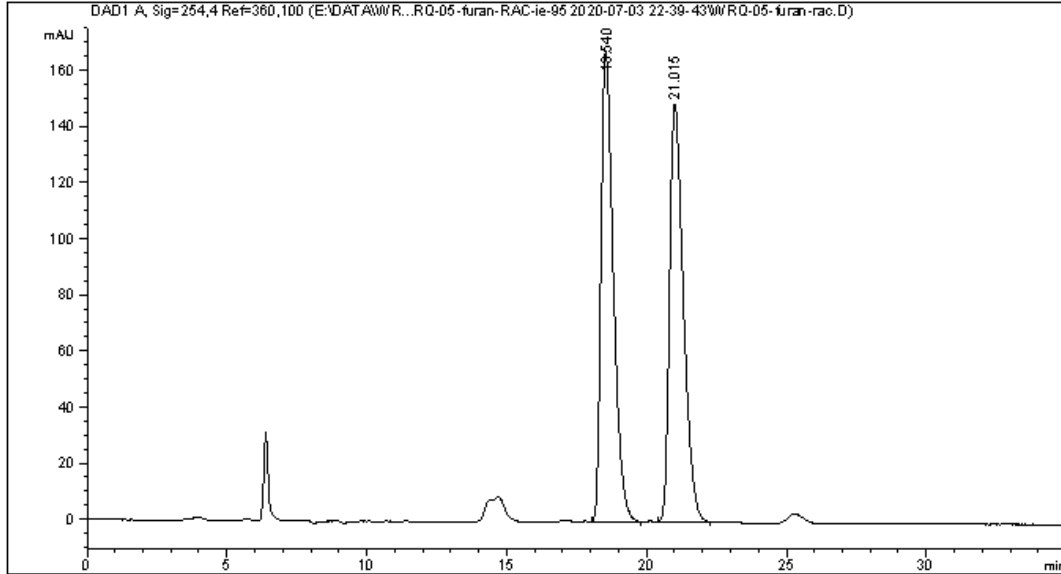

Area Percent Report

```

Sorted By      : Signal
Multiplier     : 1.0000
Dilution      : 1.0000
Do not use Multiplier & Dilution Factor with ISTDs
  
```

Signal 1: DAD1 A, Sig=254,4 Ref=360,100

| Peak # | RetTime [min] | Type | Width [min] | Area [mAU*s] | Height [mAU] | Area %  |
|--------|---------------|------|-------------|--------------|--------------|---------|
| 1      | 18.540        | BB   | 0.4409      | 5114.61133   | 167.67819    | 50.1239 |
| 2      | 21.015        | BB   | 0.5158      | 5089.32129   | 148.88193    | 49.8761 |

Totals : 1.02039e4 316.56012

Data File E:\DATA\WRQ-05-furan-s\WRQ-05-furan-RAC-ie-95 2020-07-03 23-30-38\WRQ-05-furan-s.D  
 Sample Name: WRQ-05-furan-s

```

=====
Acq. Operator   : SYSTEM                      Seq. Line :    1
Acq. Instrument : 1260                        Location  :   64
Injection Date  : 7/3/2020 11:32:10 PM       Inj       :    1
                                           Inj Volume: 15.000 µl
Acq. Method     : E:\DATA\WRQ\WRQ-05-furan-s\WRQ-05-furan-RAC-ie-95 2020-07-03 23-30-38\WRQ-4
                  -IE-95-5-DAD-1ML-30MIN.M
Last changed    : 7/3/2020 11:30:38 PM by SYSTEM
Analysis Method : E:\DATA\WRQ\WRQ-05-furan-s\WRQ-05-furan-RAC-ie-95 2020-07-03 23-30-38\WRQ-4
                  -IE-95-5-DAD-1ML-30MIN.M (Sequence Method)
Last changed    : 7/20/2020 8:31:18 PM by SYSTEM
                  (modified after loading)
  
```

Additional Info : Peak(s) manually integrated

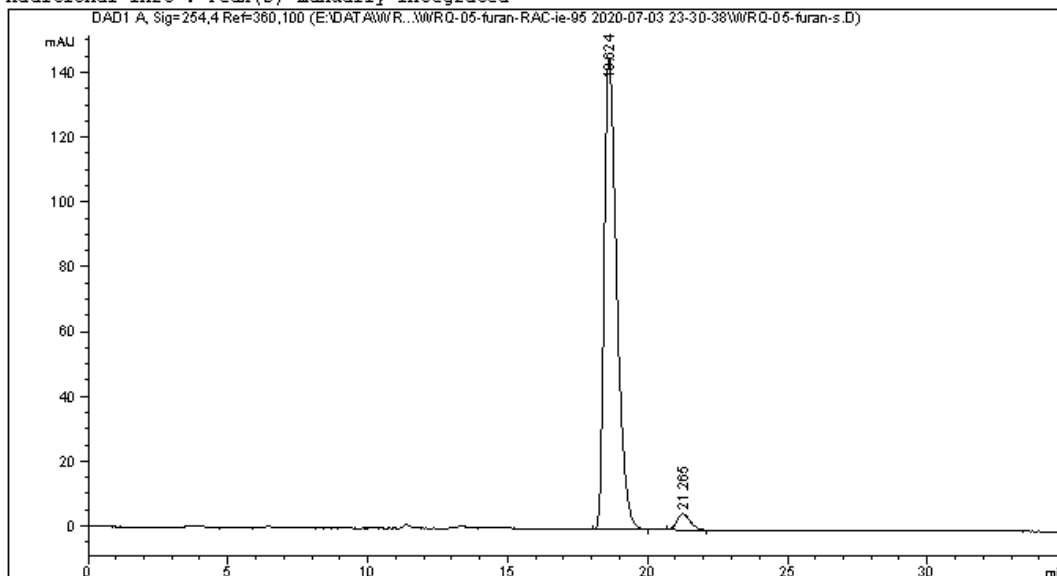

Area Percent Report

```

Sorted By      : Signal
Multiplier     : 1.0000
Dilution       : 1.0000
Do not use Multiplier & Dilution Factor with ISTDs
  
```

Signal 1: DAD1 A, Sig=254,4 Ref=360,100

| Peak # | RetTime [min] | Type | Width [min] | Area [mAU*s] | Height [mAU] | Area %  |
|--------|---------------|------|-------------|--------------|--------------|---------|
| 1      | 18.624        | BB   | 0.4687      | 4531.56299   | 145.35938    | 96.4745 |
| 2      | 21.265        | BB   | 0.3869      | 165.59886    | 5.03218      | 3.5255  |

Totals : 4697.16185 150.39156



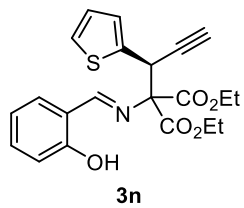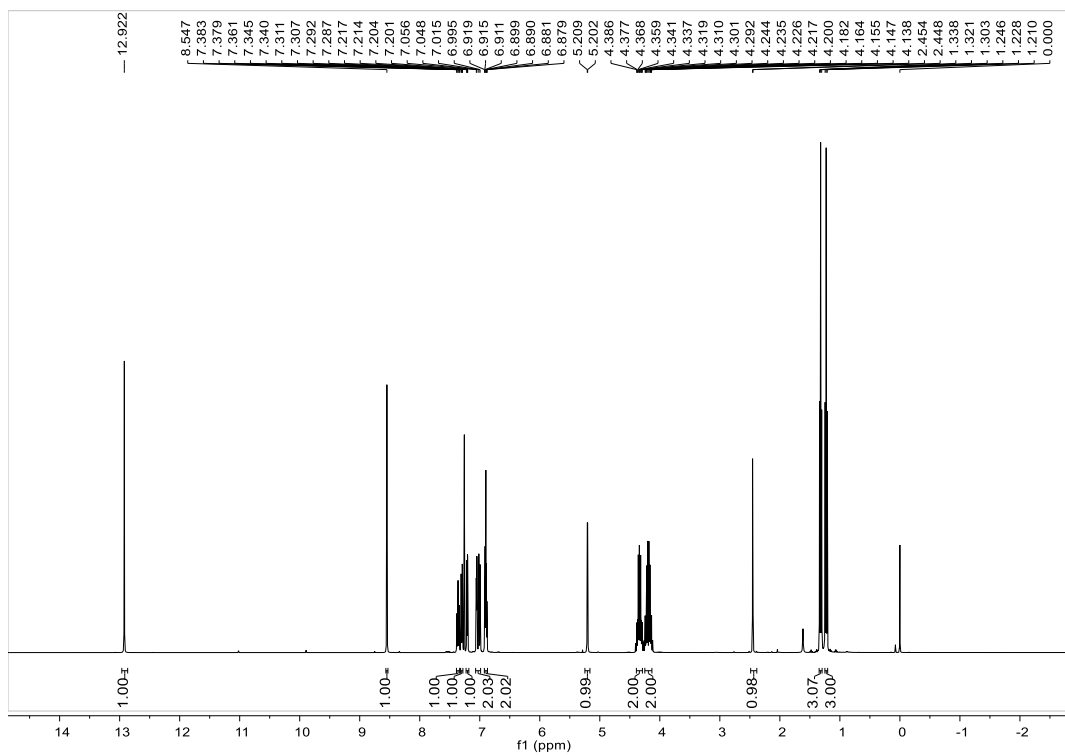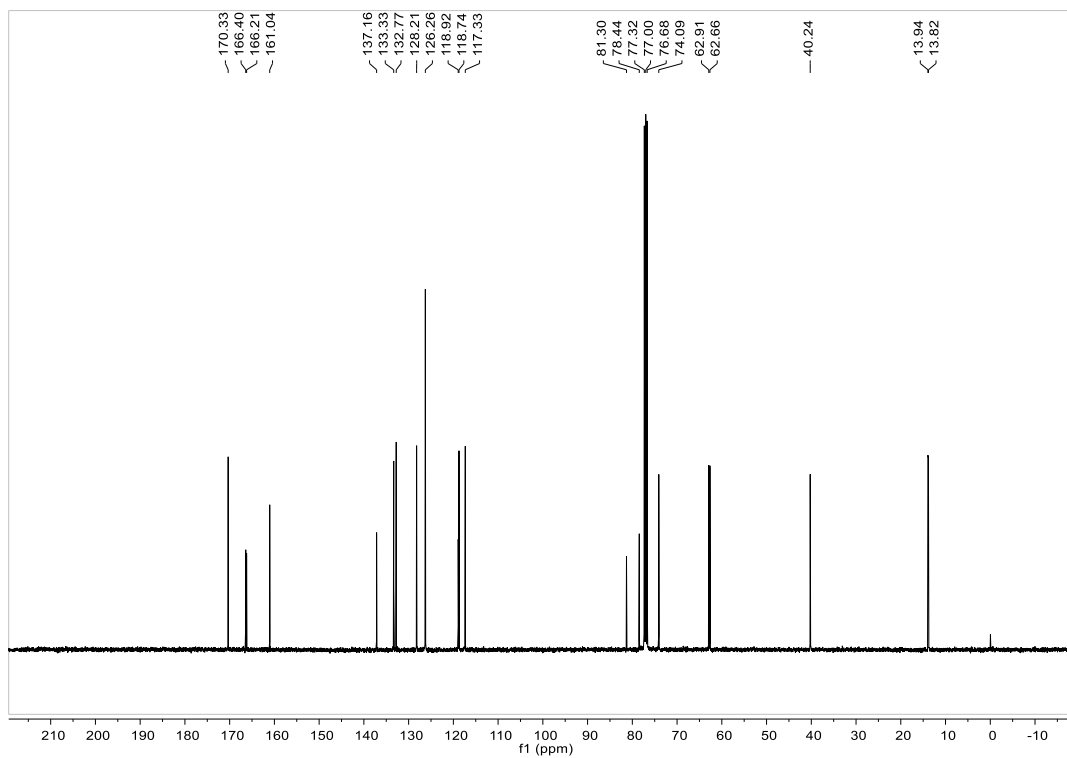

Data File D:\HPLC\Data\20220601\A 2022-06-01 09-44-10\A2.D  
 Sample Name: CGXG-SAIFEN-RAC

```

=====
Acq. Operator   : SYSTEM                      Seq. Line :    3
Sample Operator : SYSTEM
Acq. Instrument : 1260                      Location  :   81
Injection Date  : 6/1/2022 11:22:07 AM      Inj       :    1
                                           Inj Volume: 5.000 µl
Acq. Method     : D:\HPLC\Data\20220601\A 2022-06-01 09-44-10\ADH(1-6)-95-5-SUL-lml-30min-
                220nm.M
Last changed    : 6/1/2022 12:09:45 PM by SYSTEM
                (modified after loading)
Analysis Method : D:\HPLC\Data\20220601\A 2022-06-01 09-44-10\ADH(1-6)-95-5-SUL-lml-30min-
                220nm.M (Sequence Method)
Last changed    : 6/1/2022 12:58:12 PM by SYSTEM
                (modified after loading)
=====
  
```

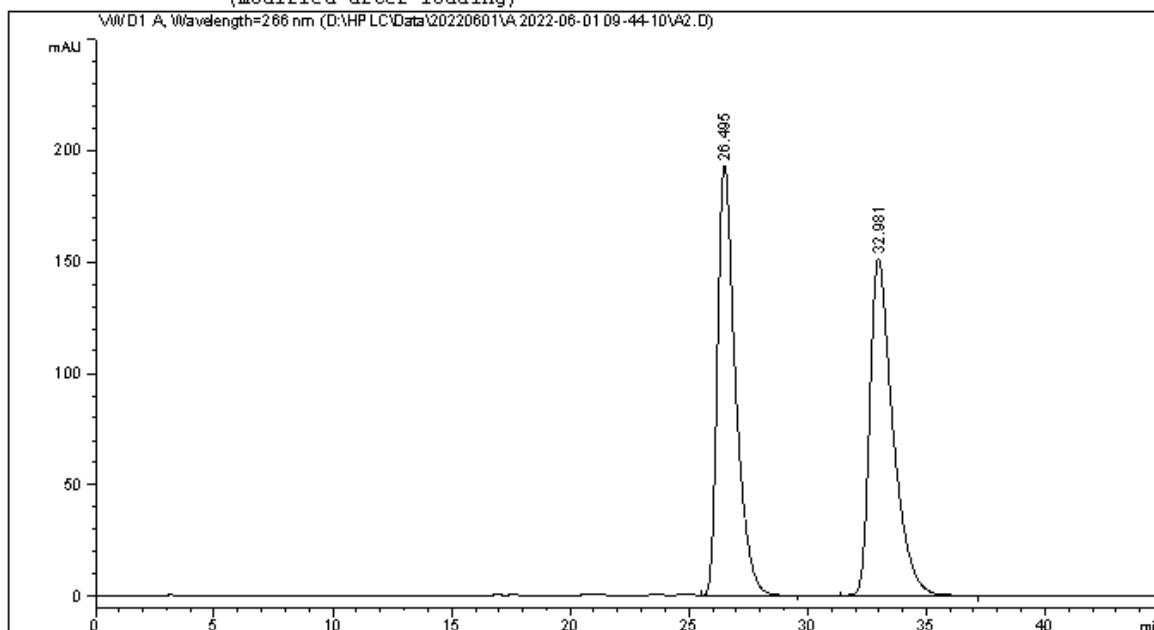

=====  
 Area Percent Report  
 =====

```

Sorted By      :      Signal
Multiplier     :      1.0000
Dilution      :      1.0000
Do not use Multiplier & Dilution Factor with ISTDs
  
```

Signal 1: VWD1 A, Wavelength=266 nm

| Peak # | RetTime [min] | Type | Width [min] | Area [mAU*s] | Height [mAU] | Area %  |
|--------|---------------|------|-------------|--------------|--------------|---------|
| 1      | 26.495        | BB   | 0.7861      | 1.01842e4    | 193.16212    | 49.8009 |
| 2      | 32.981        | BB   | 1.0089      | 1.02656e4    | 151.42755    | 50.1991 |

Totals :                    2.04498e4    344.58968

Data File D:\HPLC\Data\20220601\A 2022-06-01 09-44-10\A1.D  
Sample Name: CGXG-SAIFEN-S

```
=====
Acq. Operator   : SYSTEM                      Seq. Line :    2
Sample Operator : SYSTEM
Acq. Instrument : 1260                      Location  :   82
Injection Date  : 6/1/2022 10:30:51 AM      Inj       :    1
                                           Inj Volume: 5.000 µl
Acq. Method     : D:\HPLC\Data\20220601\A 2022-06-01 09-44-10\ADH(1-6)-95-5-SUL-lml-30min-
                220nm.M
Last changed    : 6/1/2022 11:21:10 AM by SYSTEM
                (modified after loading)
Analysis Method : D:\HPLC\Data\20220601\A 2022-06-01 09-44-10\ADH(1-6)-95-5-SUL-lml-30min-
                220nm.M (Sequence Method)
Last changed    : 6/1/2022 12:58:42 PM by SYSTEM
                (modified after loading)
Additional Info  : Peak(s) manually integrated
=====
```

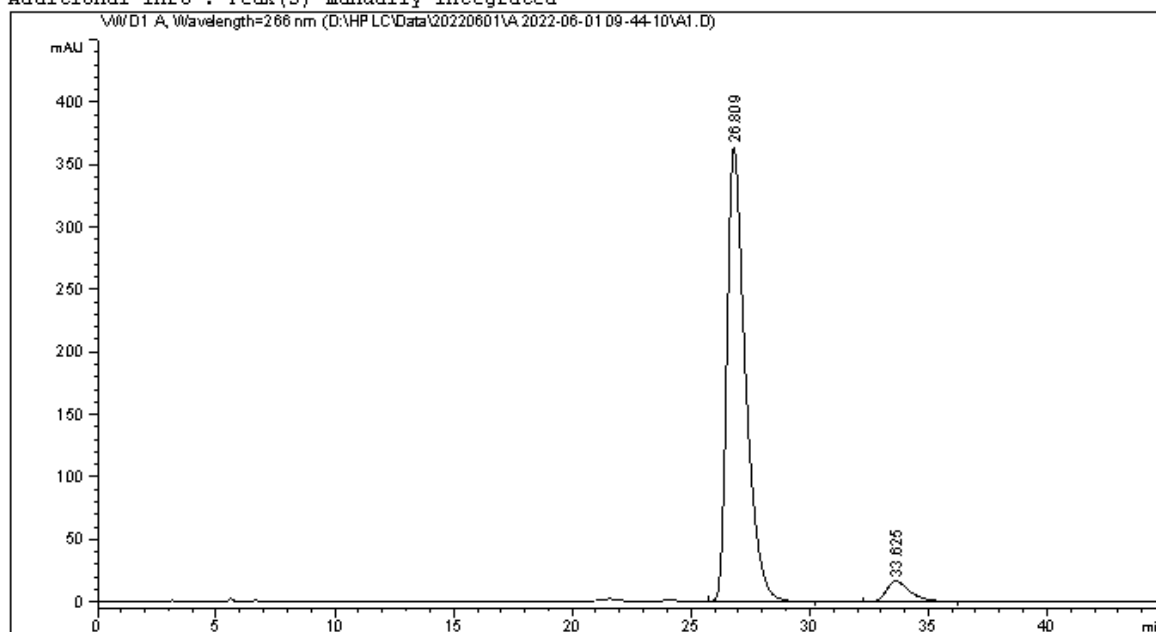

```
=====
                          Area Percent Report
=====
```

```
Sorted By      :      Signal
Multiplier     :      1.0000
Dilution      :      1.0000
Do not use Multiplier & Dilution Factor with ISTDs
```

Signal 1: VWD1 A, Wavelength=266 nm

| Peak # | RetTime [min] | Type | Width [min] | Area [mAU*s] | Height [mAU] | Area %  |
|--------|---------------|------|-------------|--------------|--------------|---------|
| 1      | 26.809        | BB   | 0.8130      | 1.96538e4    | 362.83182    | 94.7681 |
| 2      | 33.625        | BB   | 0.9829      | 1085.04285   | 16.14867     | 5.2319  |

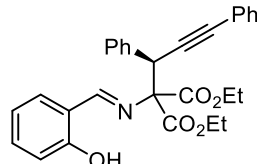

4

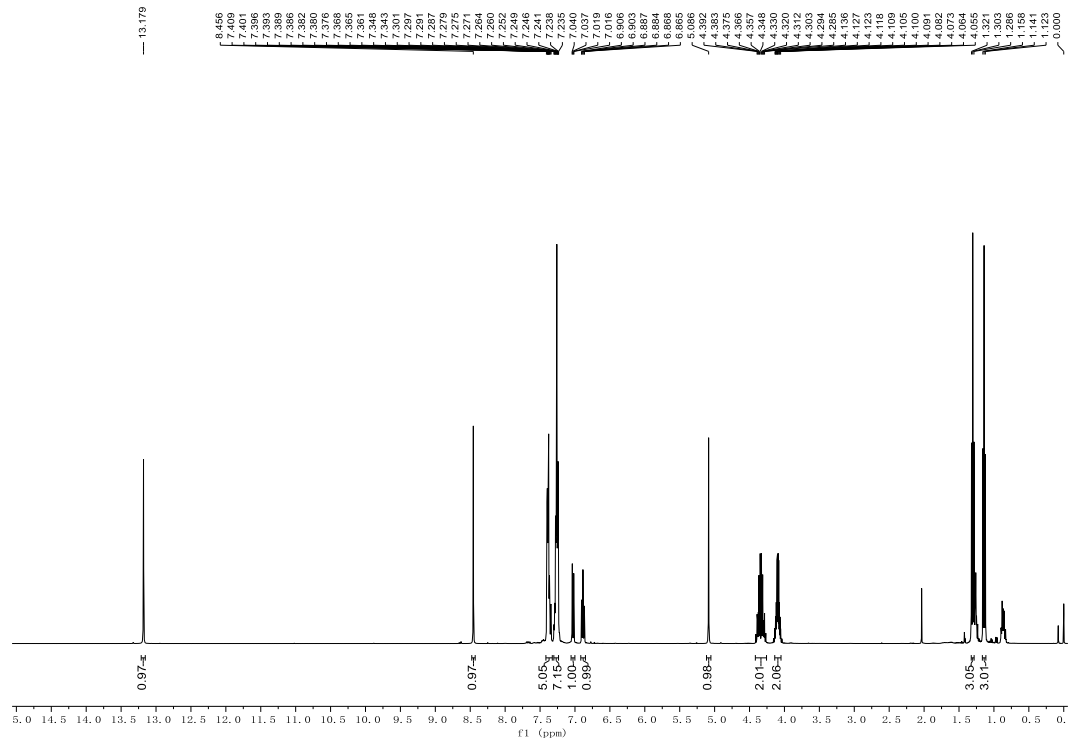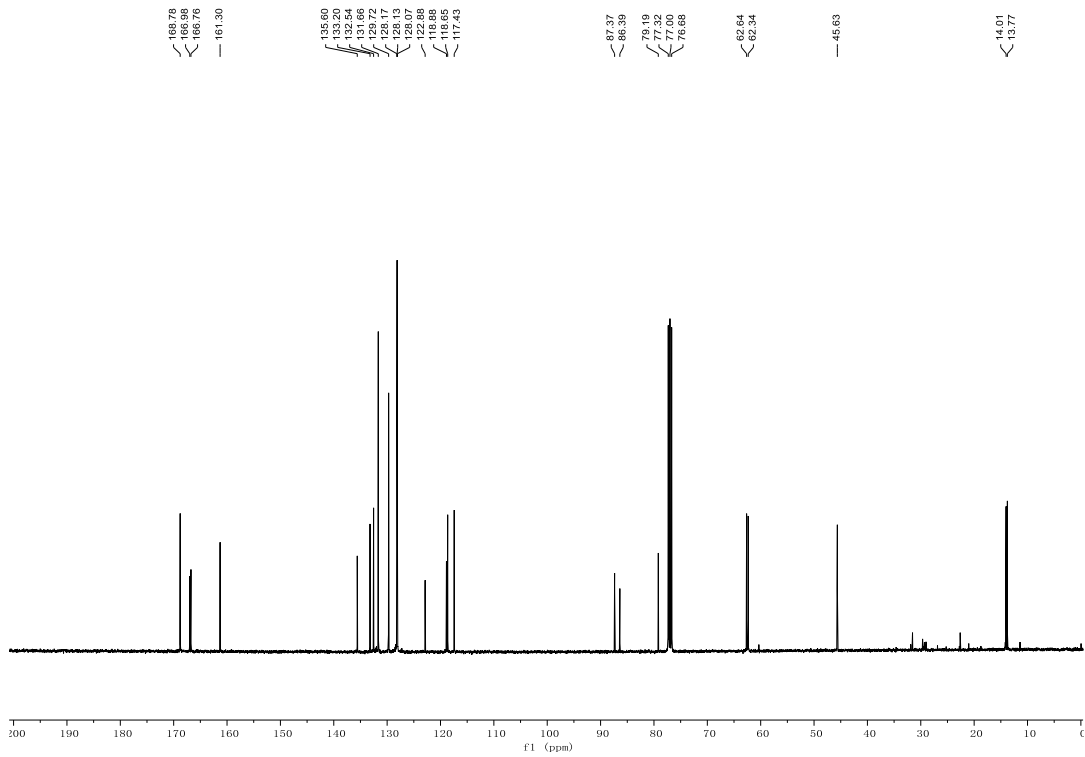

Data File E:\DATA\CGXG\CGXG-SC-15-90B 2021-07-04 09-30-36\CGXG-SC-15-90B.D  
 Sample Name: CGXG-SC-15-90B

```

=====
Acq. Operator   : SYSTEM                      Seq. Line :    1
Acq. Instrument : 1260                        Location  :   31
Injection Date  : 7/4/2021 9:32:09 AM         Inj       :    1
                                           Inj Volume: 5.000 µl

Acq. Method    : E:\DATA\CGXG\CGXG-SC-15-90B 2021-07-04 09-30-36\CGXG-2-IE-95-5-254DAD-1ML-
                 30MIN-SUL.M
Last changed   : 7/4/2021 9:52:00 AM by SYSTEM
                 (modified after loading)
Analysis Method : E:\DATA\CGXG\CGXG-SC-15-90B 2021-07-04 09-30-36\CGXG-2-IE-95-5-254DAD-1ML-
                 30MIN-SUL.M (Sequence Method)
Last changed   : 7/17/2021 5:47:38 PM by SYSTEM
                 (modified after loading)
Additional Info : Peak(s) manually integrated
  
```

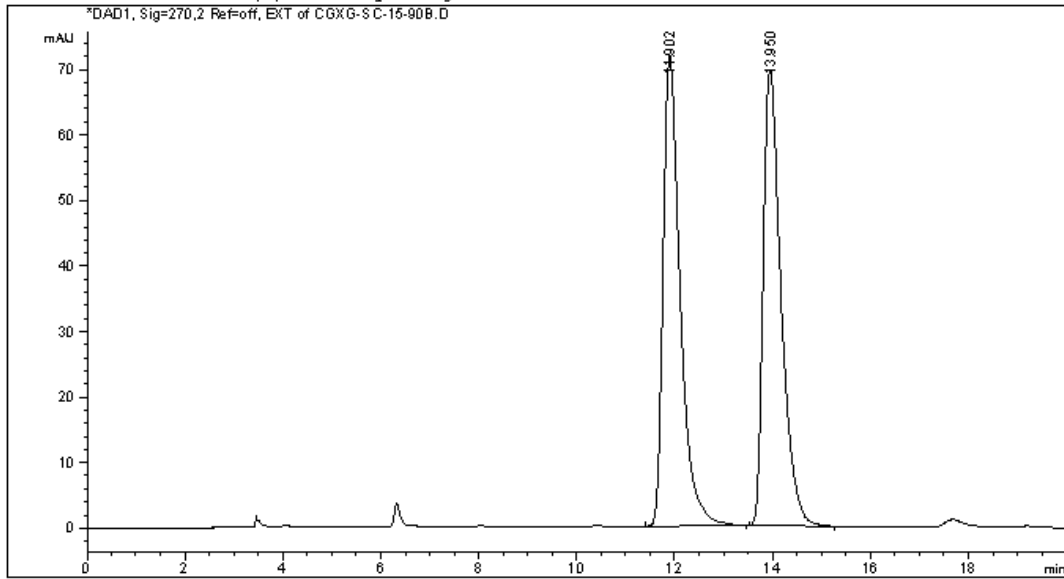

=====  
 Area Percent Report  
 =====

```

Sorted By      :      Signal
Multiplier     :      1.0000
Dilution      :      1.0000
Do not use Multiplier & Dilution Factor with ISTDs
  
```

```

Signal 1: DAD1, Sig=270,2 Ref=off, EXT
Signal has been modified after loading from rawdata file!
  
```

| Peak # | RetTime [min] | Type | Width [min] | Area [mAU*s] | Height [mAU] | Area %  |
|--------|---------------|------|-------------|--------------|--------------|---------|
| 1      | 11.902        | BB   | 0.3600      | 1738.35571   | 71.93020     | 49.7479 |
| 2      | 13.950        | BB   | 0.3757      | 1755.97742   | 69.52423     | 50.2521 |

Data File E:\DATA\CGXG\CGXG-3-SC-15-90A 2021-07-17 08-40-51\CGXG-3-SC-15-90A1.D  
 Sample Name: CGXG-3-SC-15-90A

```

=====
Acq. Operator   : SYSTEM                      Seq. Line :    2
Acq. Instrument : 1260                       Location  :   71
Injection Date  : 7/17/2021 8:53:31 AM      Inj       :    1
                                           Inj Volume: 5.000 µl

Acq. Method     : E:\DATA\CGXG\CGXG-3-SC-15-90A 2021-07-17 08-40-51\CGXG-2-IE-95-5-254DAD-1ML
                  -30MIN-5UL.M
Last changed    : 7/17/2021 9:14:40 AM by SYSTEM
                  (modified after loading)
Analysis Method : E:\DATA\CGXG\CGXG-3-SC-15-90A 2021-07-17 08-40-51\CGXG-2-IE-95-5-254DAD-1ML
                  -30MIN-5UL.M (Sequence Method)
Last changed    : 7/17/2021 5:48:26 PM by SYSTEM
                  (modified after loading)
  
```

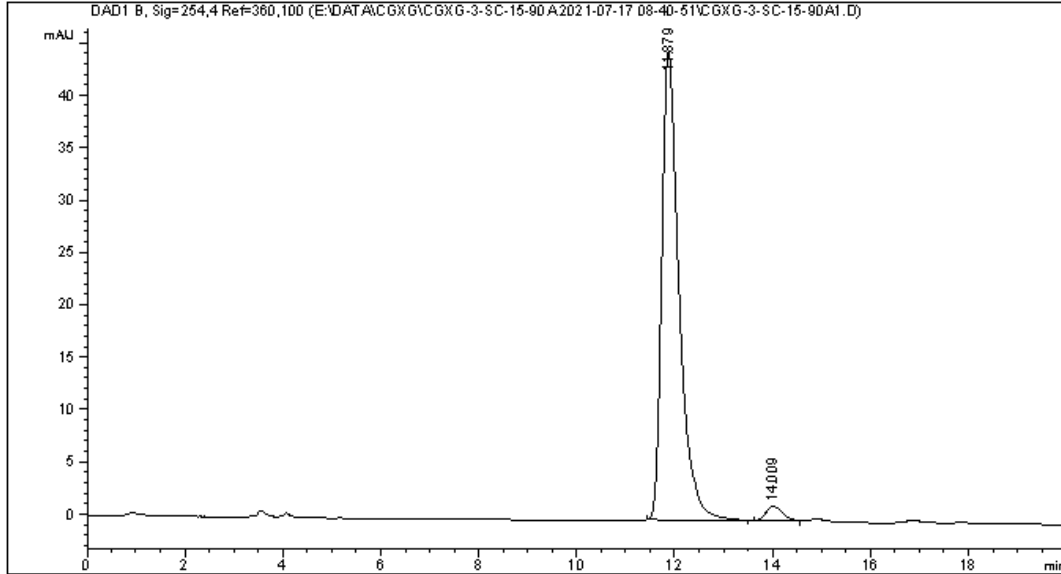

=====  
 Area Percent Report  
 =====

```

Sorted By      :      Signal
Multiplier     :      1.0000
Dilution       :      1.0000
Do not use Multiplier & Dilution Factor with ISTDs
  
```

Signal 1: DAD1 B, Sig=254,4 Ref=360,100

| Peak # | RetTime [min] | Type | Width [min] | Area [mAU*s] | Height [mAU] | Area %  |
|--------|---------------|------|-------------|--------------|--------------|---------|
| 1      | 11.879        | BB   | 0.3616      | 1095.14478   | 44.72906     | 97.1312 |
| 2      | 14.009        | BB   | 0.2731      | 32.34587     | 1.39722      | 2.8688  |

Totals :                    1127.49064    46.12627

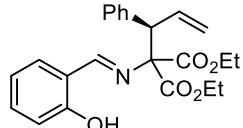

5

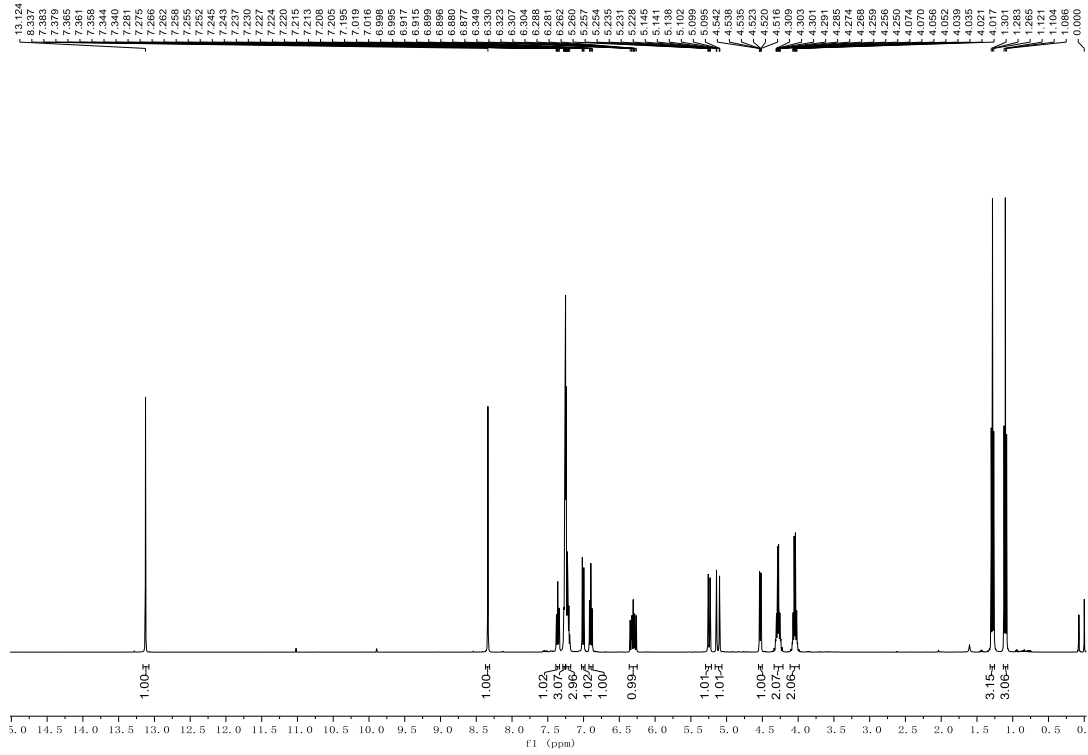

168.28  
167.56  
167.34  
— 161.06

137.76  
136.37  
133.18  
132.53  
128.96  
127.38  
118.94  
118.85  
117.27

79.08  
77.32  
77.00  
76.68

62.42  
62.07  
— 55.10

13.96  
13.76

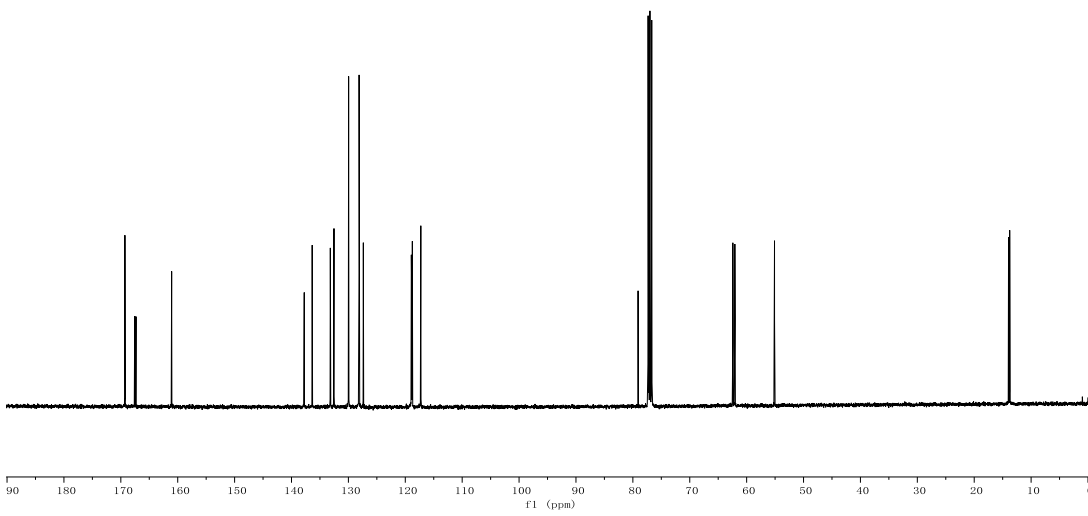

Data File E:\DATA\CGXG\CGXG-3-151-SC-100 2021-07-16 11-53-35\CGXG-3-151-SC-1001.D  
 Sample Name: CGXG-3-151-RAC

```

=====
Acq. Operator   : SYSTEM                      Seq. Line :    2
Acq. Instrument : 1260                       Location  :   71
Injection Date  : 7/16/2021 12:06:12 PM      Inj       :    1
                                           Inj Volume: 5.000 µl

Acq. Method     : E:\DATA\CGXG\CGXG-3-151-SC-100 2021-07-16 11-53-35\CGXG-2-IE-95-5-254DAD-
                  LML-30MIN-SUL.M
Last changed    : 7/16/2021 12:36:31 PM by SYSTEM
                  (modified after loading)
Analysis Method : E:\DATA\CGXG\CGXG-3-151-SC-100 2021-07-16 11-53-35\CGXG-2-IE-95-5-254DAD-
                  LML-30MIN-SUL.M (Sequence Method)
Last changed    : 7/17/2021 5:39:15 PM by SYSTEM
                  (modified after loading)
Additional Info : Peak(s) manually integrated
  
```

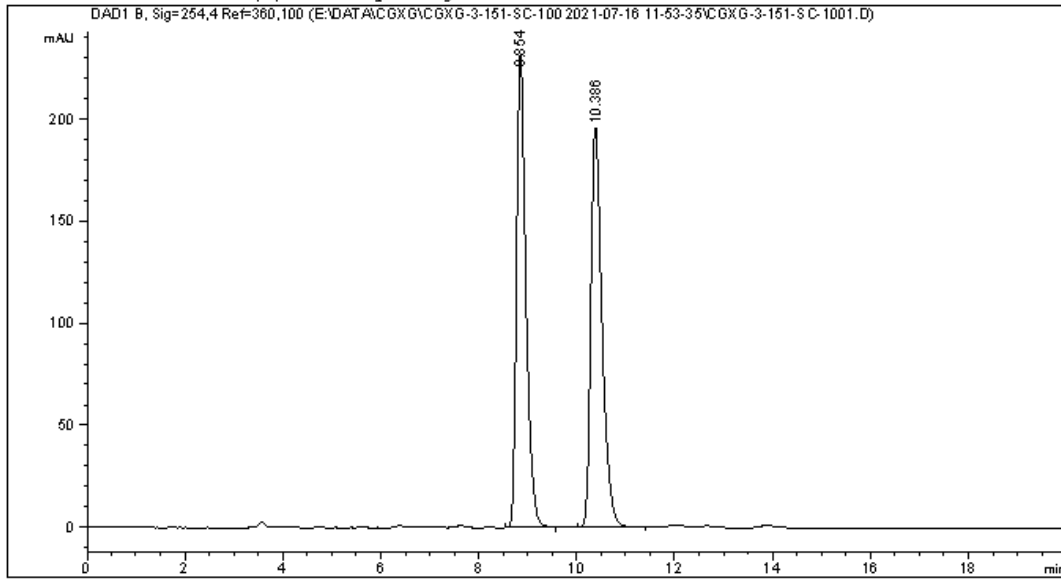

=====  
 Area Percent Report  
 =====

```

Sorted By      :      Signal
Multiplier     :      1.0000
Dilution      :      1.0000
Do not use Multiplier & Dilution Factor with ISTDs
  
```

Signal 1: DAD1 B, Sig=254,4 Ref=360,100

| Peak # | RetTime [min] | Type | Width [min] | Area [mAU*s] | Height [mAU] | Area %  |
|--------|---------------|------|-------------|--------------|--------------|---------|
| 1      | 8.854         | BB   | 0.1989      | 3055.35693   | 231.66972    | 49.6508 |
| 2      | 10.386        | BB   | 0.2365      | 3098.33350   | 195.87973    | 50.3492 |

Totals :                    6153.69043   427.54945



Data File E:\DATA\CGXG\CGXG-3-151-SC-100 2021-07-16 11-53-35\CGXG-3-151-SC-1002.D  
 Sample Name: CGXG-3-151-S

```

=====
Acq. Operator   : SYSTEM                      Seq. Line :    3
Acq. Instrument : 1260                      Location  :   72
Injection Date  : 7/16/2021 12:38:30 PM      Inj       :    1
                                           Inj Volume: 5.000 µl

Acq. Method     : E:\DATA\CGXG\CGXG-3-151-SC-100 2021-07-16 11-53-35\CGXG-2-IE-95-5-254DAD-
                  LML-30MIN-SUL.M
Last changed    : 7/16/2021 1:01:45 PM by SYSTEM
                  (modified after loading)
Analysis Method : E:\DATA\CGXG\CGXG-3-151-SC-100 2021-07-16 11-53-35\CGXG-2-IE-95-5-254DAD-
                  LML-30MIN-SUL.M (Sequence Method)
Last changed    : 7/17/2021 5:39:40 PM by SYSTEM
                  (modified after loading)
Additional Info : Peak(s) manually integrated
  
```

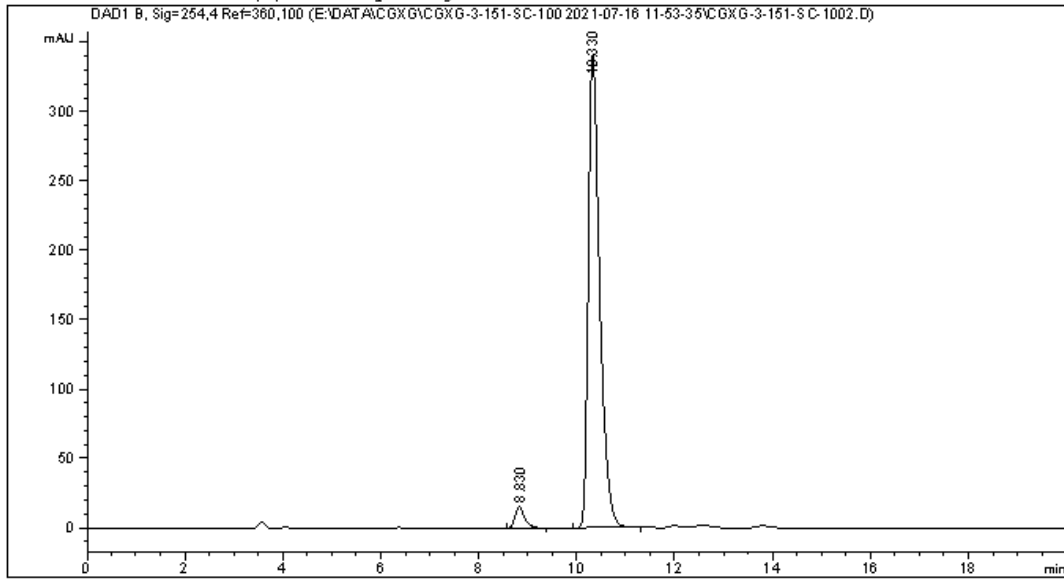

=====  
 Area Percent Report  
 =====

```

Sorted By      :      Signal
Multiplier     :      1.0000
Dilution      :      1.0000
Do not use Multiplier & Dilution Factor with ISTDs
  
```

Signal 1: DAD1 B, Sig=254,4 Ref=360,100

| Peak # | RetTime [min] | Type | Width [min] | Area [mAU*s] | Height [mAU] | Area %  |
|--------|---------------|------|-------------|--------------|--------------|---------|
| 1      | 8.830         | BB   | 0.1970      | 198.56895    | 15.14498     | 3.4739  |
| 2      | 10.330        | BB   | 0.2438      | 5517.49658   | 341.02316    | 96.5261 |

Totals :                    5716.06554   356.16814

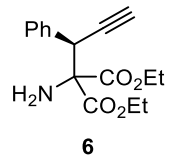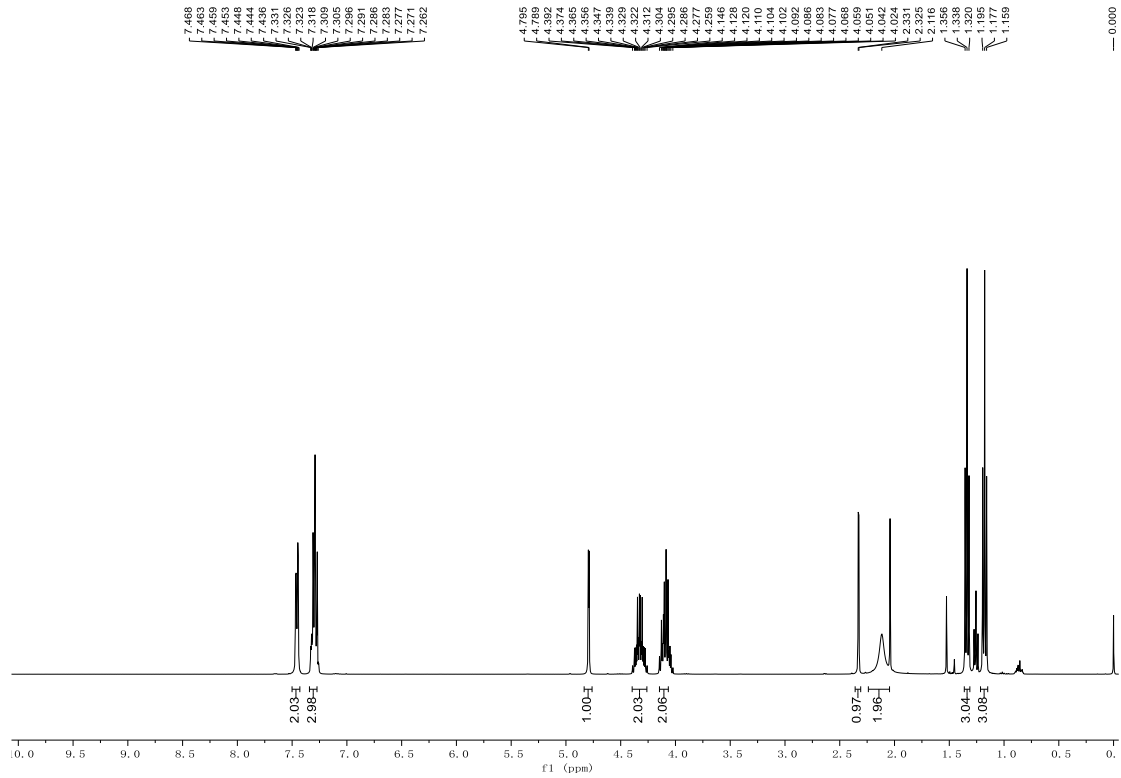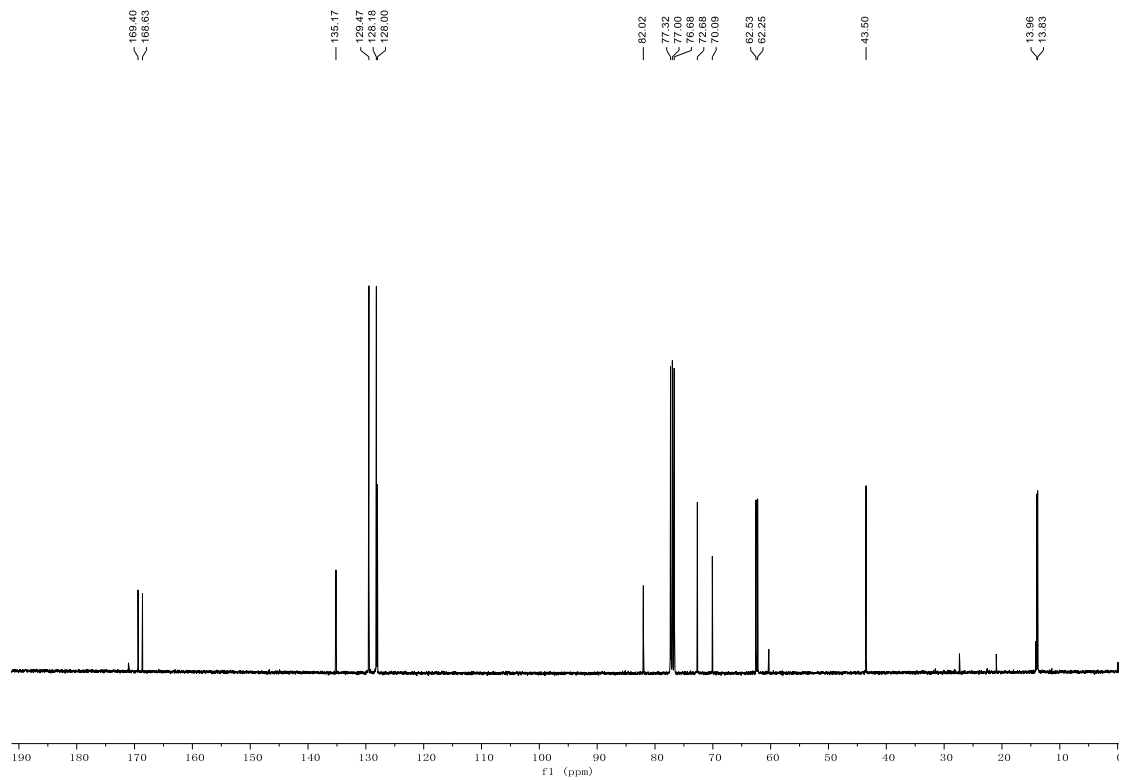

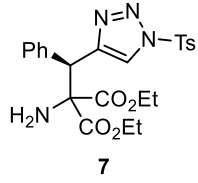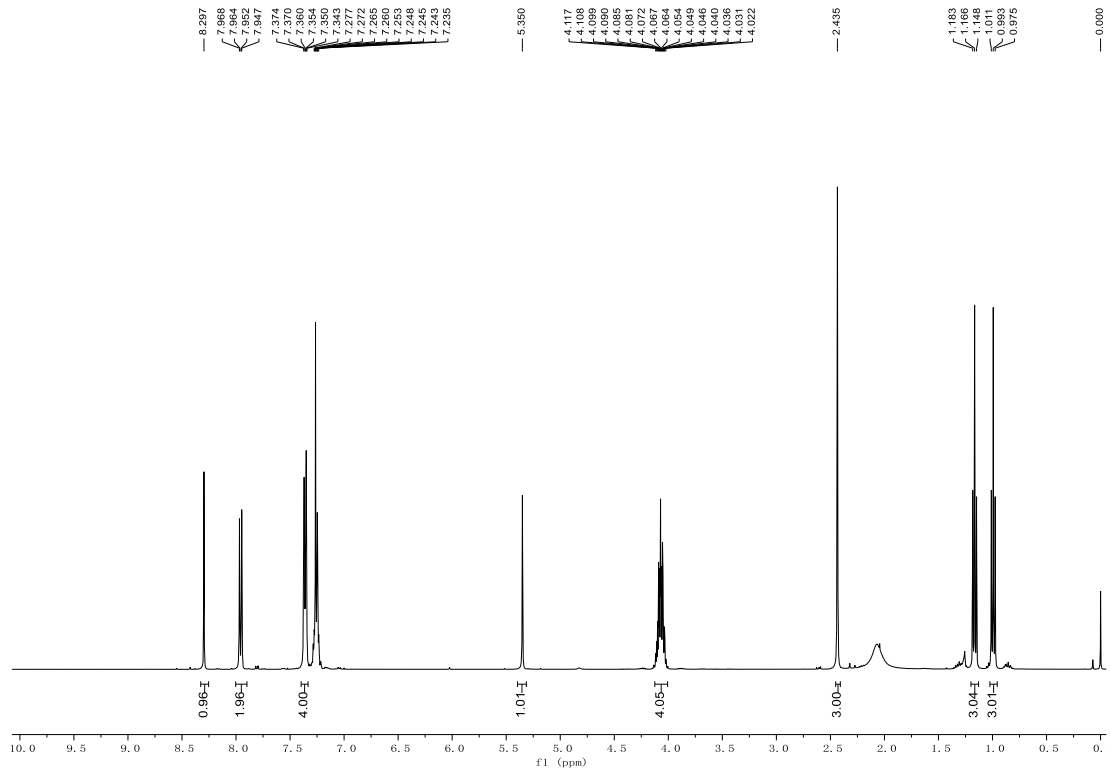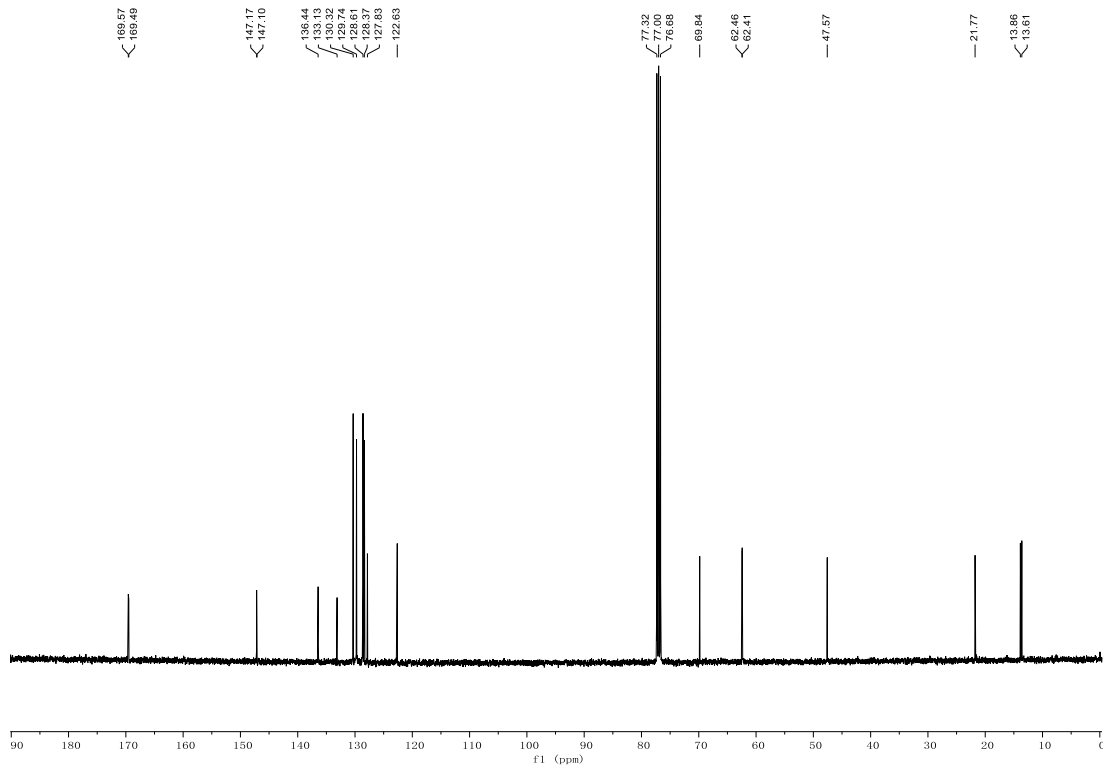

Data File E:\DATA\SC\SC-16-2-5\SC-16-5-RAC-AS-90 2021-04-02 09-54-54\SC-16-2-5.D  
 Sample Name: SC-16-5-RAC-AS-90

```

=====
Acq. Operator   : SYSTEM                      Seq. Line :    1
Acq. Instrument : 1260                      Location  :   81
Injection Date  : 4/2/2021 9:56:17 AM       Inj       :    1
                                           Inj Volume: 5.000 µl

Acq. Method     : E:\DATA\SC\SC-16-2-5\SC-16-5-RAC-AS-90 2021-04-02 09-54-54\SC-1-ASH-90-10-
                  DAD-1ML.M
Last changed    : 4/2/2021 9:54:54 AM by SYSTEM
Analysis Method : E:\DATA\SC\SC-16-2-5\SC-16-5-RAC-AS-90 2021-04-02 09-54-54\SC-1-ASH-90-10-
                  DAD-1ML.M (Sequence Method)
Last changed    : 6/27/2021 10:34:22 PM by SYSTEM
                  (modified after loading)
Additional Info : Peak(s) manually integrated
  
```

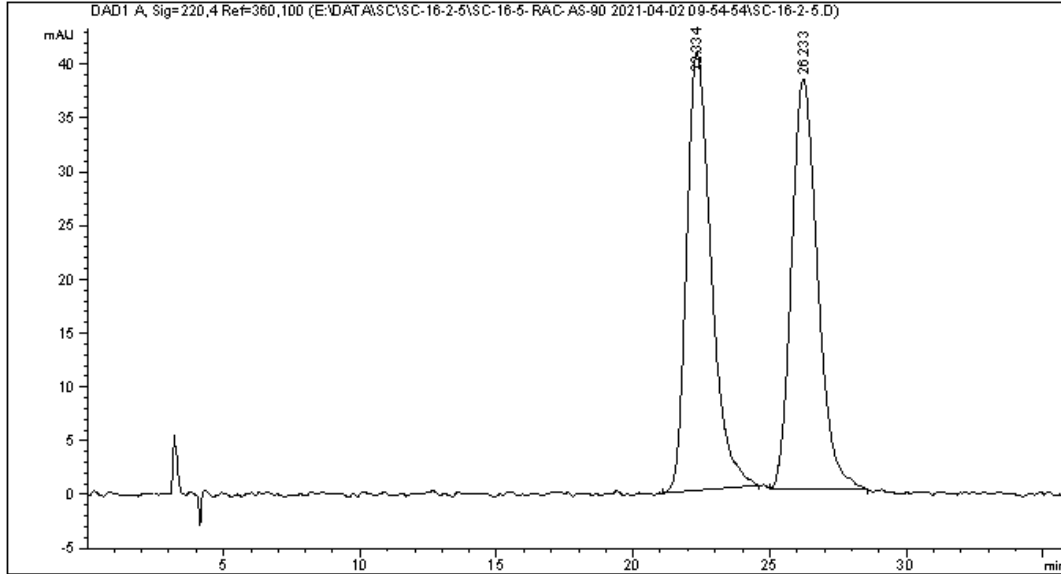

=====  
 Area Percent Report  
 =====

```

Sorted By      :      Signal
Multiplier     :      1.0000
Dilution      :      1.0000
Do not use Multiplier & Dilution Factor with ISTDs
  
```

Signal 1: DAD1 A, Sig=220,4 Ref=360,100

| Peak # | RetTime [min] | Type | Width [min] | Area [mAU*s] | Height [mAU] | Area %  |
|--------|---------------|------|-------------|--------------|--------------|---------|
| 1      | 22.334        | BB   | 0.8360      | 2548.25391   | 40.83508     | 50.1935 |
| 2      | 26.233        | BB   | 0.8144      | 2528.60669   | 38.09251     | 49.8065 |

Totals :                    5076.86060    78.92759

Data File E:\DATA\SC\SC-16-2-5\SC-16-2 2021-04-02 10-34-12\SC-16-2-5.D  
 Sample Name: SC-16-2

```

=====
Acq. Operator   : SYSTEM                      Seq. Line :    1
Acq. Instrument : 1260                       Location  :   82
Injection Date  : 4/2/2021 10:35:35 AM      Inj       :    1
                                           Inj Volume: 5.000 µl

Acq. Method     : E:\DATA\SC\SC-16-2-5\SC-16-2 2021-04-02 10-34-12\SC-1-ASH-90-10-DAD-1ML.M
Last changed    : 4/2/2021 10:34:39 AM by SYSTEM
                  (modified after loading)

Analysis Method : E:\DATA\SC\SC-16-2-5\SC-16-2 2021-04-02 10-34-12\SC-1-ASH-90-10-DAD-1ML.M (
                  Sequence Method)

Last changed    : 6/27/2021 10:33:49 PM by SYSTEM
                  (modified after loading)

Additional Info : Peak(s) manually integrated
  
```

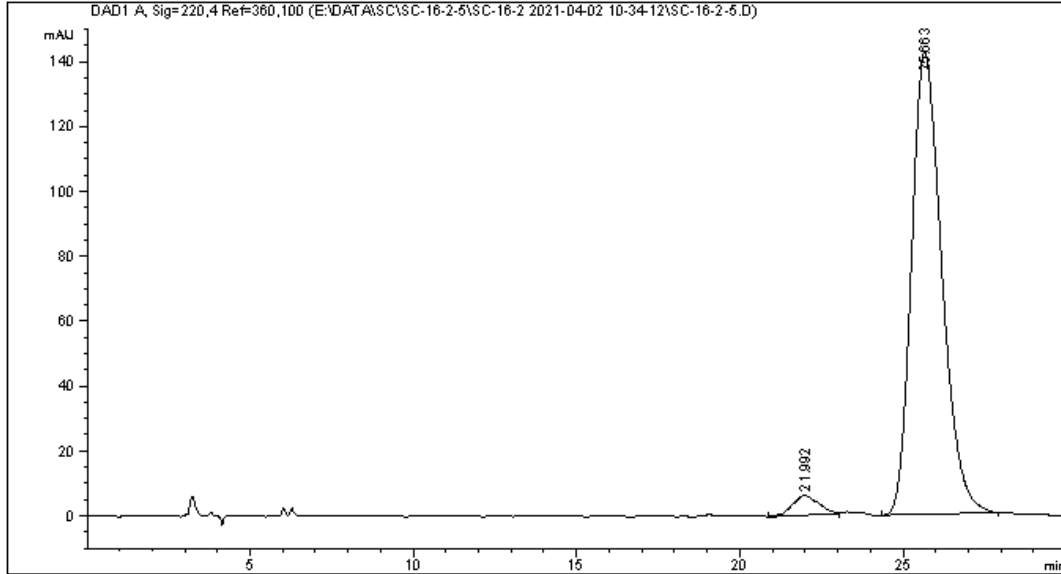

=====  
 Area Percent Report  
 =====

```

Sorted By      :      Signal
Multiplier     :      1.0000
Dilution       :      1.0000
Do not use Multiplier & Dilution Factor with ISTDs
  
```

Signal 1: DAD1 A, Sig=220,4 Ref=360,100

| Peak # | RetTime [min] | Type | Width [min] | Area [mAU*s] | Height [mAU] | Area %  |
|--------|---------------|------|-------------|--------------|--------------|---------|
| 1      | 21.992        | BB   | 0.6461      | 331.77695    | 6.02809      | 3.4881  |
| 2      | 25.663        | BB   | 0.9405      | 9179.81152   | 142.70569    | 96.5119 |

Totals :                    9511.58847   148.73378

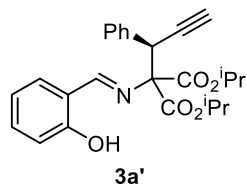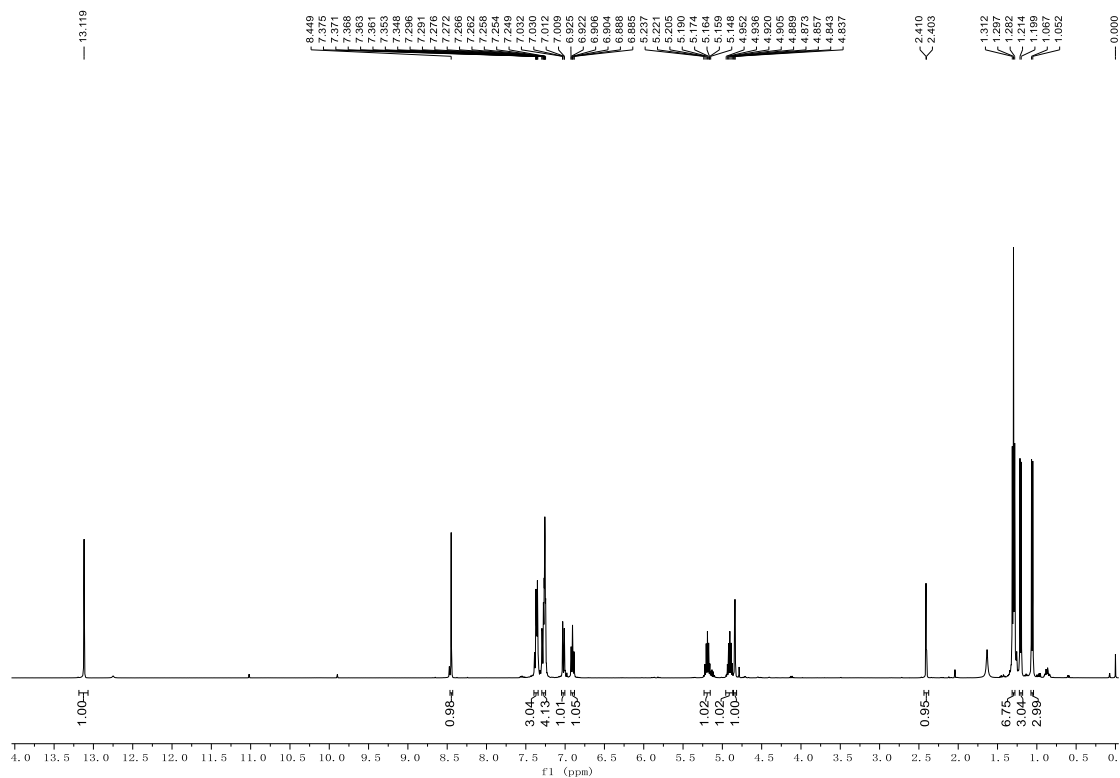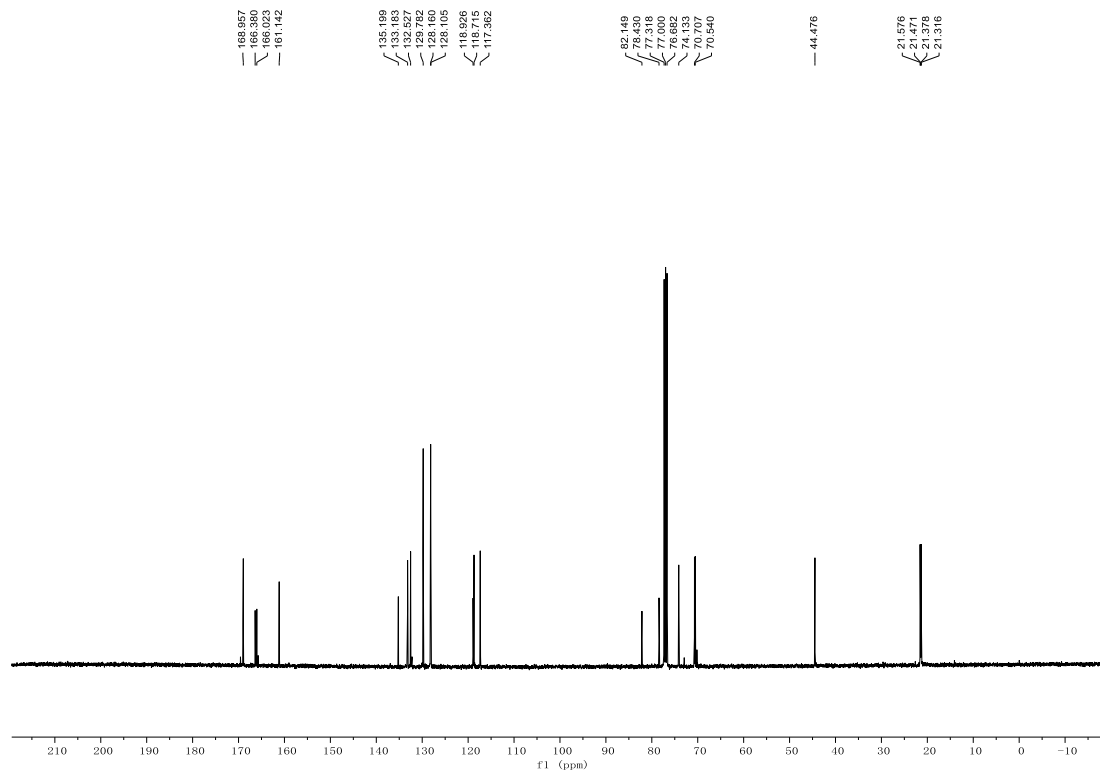

```

=====
Acq. Operator   : 系统                      Seq. Line :    1
Sample Operator : 系统
Acq. Instrument : L200                      Location  :   61
Injection Date  : 6/28/2021 7:06:37 PM      Inj       :    1
                                           Inj Volume: 5.000 µl
Acq. Method     : D:\LC\DATA\CGXG\SC-16-46-rac\SC-16-46-rac 2021-06-28 19-05-53\CGXG-ADH-95-5
                  -262NM-1ML-30MIKN-5UL.M
Last changed    : 6/28/2021 5:23:03 PM by 系统
Analysis Method : D:\LC\DATA\CGXG\SC-16-46-rac\SC-16-46-rac 2021-06-28 19-05-53\CGXG-ADH-95-5
                  -262NM-1ML-30MIKN-5UL.M (Sequence Method)
Last changed    : 7/17/2021 5:35:14 PM by 系统
                  (modified after loading)
Additional Info : Peak(s) manually integrated
  
```

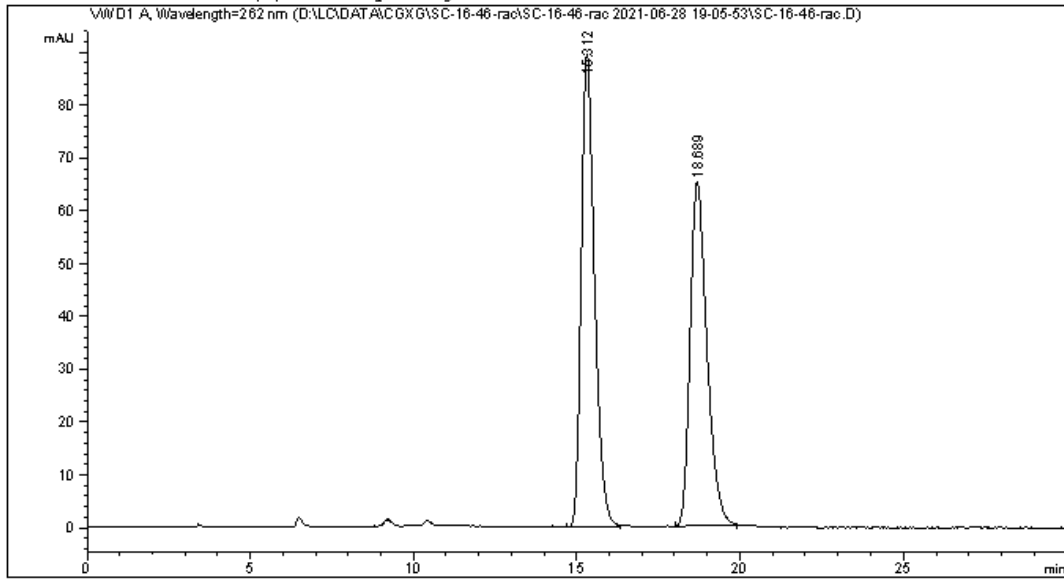

Area Percent Report

```

Sorted By      : Signal
Multiplier     : 1.0000
Dilution       : 1.0000
Do not use Multiplier & Dilution Factor with ISTDs
  
```

Signal 1: VWD1 A, Wavelength=262 nm

| Peak # | RetTime [min] | Type | Width [min] | Area [mAU*s] | Height [mAU] | Area %  |
|--------|---------------|------|-------------|--------------|--------------|---------|
| 1      | 15.312        | VB   | 0.4287      | 2539.73535   | 89.47033     | 52.2218 |
| 2      | 18.689        | BB   | 0.5356      | 2323.62671   | 65.12861     | 47.7782 |

Totals : 4863.36206 154.59894

Data File D:\LC\DATA\CGXG\SC-16-47-opt\SC-16-47-opt 2021-06-28 17-28-11\SC-16-47-opt.D  
Sample Name: SC-16-47-opt

```
=====
Acq. Operator   : 系统                      Seq. Line :    1
Sample Operator : 系统
Acq. Instrument : L200                      Location  :   61
Injection Date  : 6/28/2021 5:28:54 PM      Inj       :    1
                                           Inj Volume: 5.000 µl
Acq. Method     : D:\LC\DATA\CGXG\SC-16-47-opt\SC-16-47-opt 2021-06-28 17-28-11\CGXG-ADH-95-5
                  -262NM-1ML-30MIKN-5UL.M
Last changed    : 6/28/2021 5:23:03 PM by 系统
Analysis Method : D:\LC\DATA\CGXG\SC-16-47-opt\SC-16-47-opt 2021-06-28 17-28-11\CGXG-ADH-95-5
                  -262NM-1ML-30MIKN-5UL.M (Sequence Method)
Last changed    : 7/17/2021 5:34:54 PM by 系统
                  (modified after loading)
Additional Info : Peak(s) manually integrated
=====
```

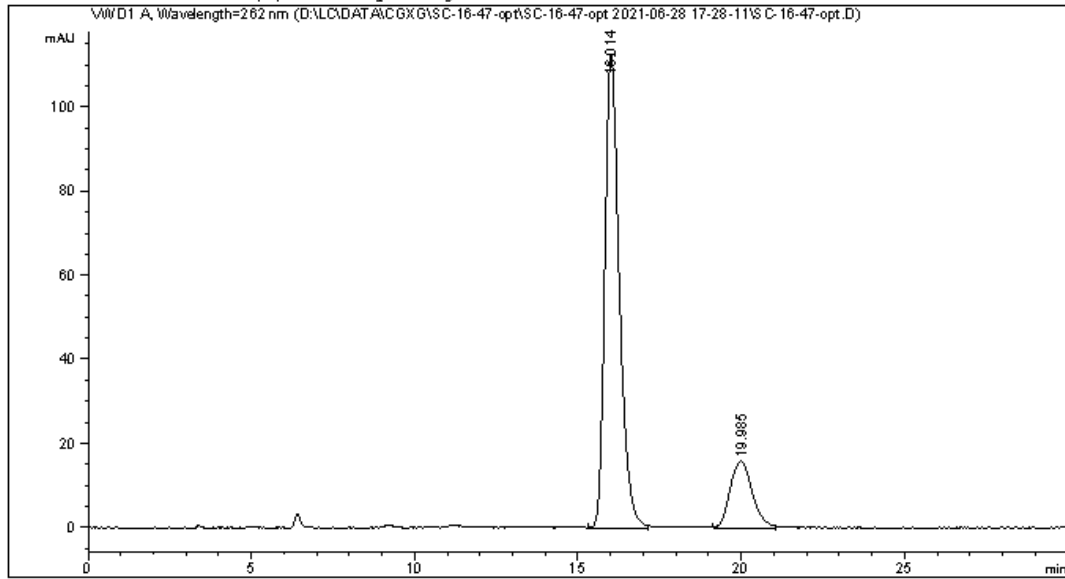

=====  
Area Percent Report  
=====

```
Sorted By      : Signal
Multiplier     : 1.0000
Dilution       : 1.0000
Do not use Multiplier & Dilution Factor with ISTDs
```

Signal 1: VWD1 A, Wavelength=262 nm

| Peak # | RetTime [min] | Type | Width [min] | Area [mAU*s] | Height [mAU] | Area %  |
|--------|---------------|------|-------------|--------------|--------------|---------|
| 1      | 16.014        | BV   | 0.4669      | 3480.48633   | 112.61360    | 82.3388 |
| 2      | 19.985        | VV   | 0.5955      | 746.54651    | 15.82673     | 17.6612 |

Totals :                   4227.03284 128.44033

1200 7/17/2021 5:34:57 PM 系统

Page 1 of 2
